# 1 Somatodendritic HCN channels in 2 hippocampal OLM cells revealed by a 3 convergence of computational 4 models and experiments

5 **Vladislav Sekulić**<sup>1,2\*‡</sup>, **Feng Yi**<sup>3</sup>, **Tavita Garrett**<sup>4</sup>, **Alexandre Guet-McCreight**<sup>1,2</sup>,  
6 **Yvette Y. Lopez**<sup>5</sup>, **Mychael Solis-Wheeler**<sup>5,6</sup>, **Rui Wang**<sup>5</sup>, **Xiaobo Liu**<sup>5,7</sup>, **J. Josh**  
7 **Lawrence**<sup>5,8†</sup>, **Frances K. Skinner**<sup>1,9\*†</sup>

**\*For correspondence:**

[vlad.sekulic@gmail.com](mailto:vlad.sekulic@gmail.com) (VS);  
[john.lawrence@ttuhsc.edu](mailto:john.lawrence@ttuhsc.edu) (JLL);  
[frances.skinner@gmail.com](mailto:frances.skinner@gmail.com) (FS)

†Shared Senior Authors

**Present address:** ‡RIKEN, Japan

8 <sup>1</sup>Krembil Research Institute, University Health Network, Toronto, Ontario, Canada;  
9 <sup>2</sup>Department of Physiology, University of Toronto, Toronto, Ontario, Canada; <sup>3</sup>  
10 Department of Biomedical and Pharmaceutical Sciences, Center for Structural and  
11 Functional Neuroscience, and Center for Biomolecular Structure and Dynamics,  
12 University of Montana, Missoula, Montana, USA; <sup>4</sup>Neuroscience Graduate Program and  
13 Oregon Hearing Research Center and Vollum Institute; Oregon Health and Science  
14 University, Portland, Oregon, USA; <sup>5</sup>Department of Pharmacology and Neuroscience,  
15 Texas Tech University Health Sciences Center, Lubbock, Texas, USA; <sup>6</sup>Honors College,  
16 Texas Tech University, Lubbock, Texas, USA; <sup>7</sup>Graduate School of Biomedical Sciences,  
17 TTUHSC, Lubbock, TX USA; <sup>8</sup>Center of Excellence for Translational Neuroscience and  
18 Therapeutics, Texas Tech University Health Sciences Center, Lubbock, Texas, USA;  
19 <sup>9</sup>Departments of Medicine (Neurology) and Physiology, University of Toronto, Toronto,  
20 Ontario, Canada

---

## 22 Abstract

23 Determining details of spatially extended neurons is a challenge that needs to be overcome. The  
24 oriens-lacunosum/moleculare (OLM) interneuron has been implicated as a critical controller of  
25 hippocampal memory making it essential to understand how its biophysical properties contribute  
26 to function. We previously used computational models to show that OLM cells exhibit theta spiking  
27 resonance frequencies that depend on their dendrites having hyperpolarization-activated cation  
28 channels (h-channels). However, whether OLM cells have dendritic h-channels is unknown. We  
29 performed a set of whole-cell recordings of OLM cells from mouse hippocampus and constructed  
30 multi-compartment models using morphological and electrophysiological parameters extracted  
31 from the same cell. The models matched experiments only when dendritic h-channels were  
32 present. Immunohistochemical localization of the HCN2 subunit confirmed dendritic expression.  
33 These models can be used to obtain insight into hippocampal function. Our work shows that a tight  
34 integration of model and experiment tackles the challenge of characterizing spatially extended  
35 neurons.

## 37 Introduction

38 The challenge of understanding brain function given its many cell types and circuits is being greatly  
39 aided by the development of sophisticated experimental techniques, big data, and interdisciplinary  
40 collaborations (*Ecker et al., 2017*). Furthermore, the use of computational brain models is becoming  
41 more established as an important tool that can bridge across scales and levels (*Bassett et al., 2018*;  
42 *Cutsuridis et al., 2010*; *O’Leary et al., 2015*). It is becoming increasingly clear that it is essential to  
43 consider the unique contributions of specific cell types and circuits in order to understand brain  
44 behaviour (*Luo et al., 2018*). In particular, we know that different inhibitory cell types can control  
45 circuit output and brain function in specific ways (*Abbas et al., 2018*; *Cardin, 2018*; *Kepecs and*  
46 *Fishell, 2014*; *Roux and Buzsáki, 2015*) and, by extension, disease states (*Marín, 2012*).

47 The contribution of a specific cell type to network and behavioural function is necessarily  
48 grounded in its biophysical properties. While immunohistochemical and single-cell transcriptomic  
49 studies provide insight into which ion channels might be present in a particular cell type, how  
50 different cell types contribute to function must necessarily include its activity within circuits (*Kopell*  
51 *et al., 2014*). An individual neuron’s activity largely arises from its ion channel kinetics, densities, and  
52 localization across its neuronal compartments. In this regard, mathematical multi-scale (channel  
53 and cellular), multi-compartment computational models are needed to help provide insights and  
54 hypotheses of how specific cell types contribute to brain function and disease processes. However,  
55 developing such mathematical models come with their own set of caveats and limitations. Creating  
56 such models requires quantitative knowledge of the precise characteristics of the particular cell  
57 type, and it is highly challenging, if not impossible, to obtain comprehensive knowledge of all the  
58 relevant biophysical parameters of each compartment of each cell type experimentally. Conversely,  
59 mathematical models, no matter how detailed, are always a simplification relative to biological  
60 reality and limited by the available experimental data. It is therefore important not to lose sight of  
61 the limitations of both model and experiment by having an ongoing dialogue between the two.

62 It is now well-known that the characteristics of a given cell type are not fixed (*Marder and Goail-*  
63 *lard, 2006*), and thus a component of experimental variability reflects heterogeneity inherent in  
64 specific neuronal populations and thus in circuits. Moreover, such variability is likely to be function-  
65 ally important (*Wilson, 2010*). Previous work has shown that conductance densities for a given ion  
66 channel in an identified cell type can have a two to six-fold range of values (*Goaillard et al., 2009*;  
67 *Ransdell et al., 2013*). Despite this variability in channel conductances, robust neuronal as well as  
68 circuit output is maintained, as most clearly shown in the crustacean stomatogastric ganglion circuit  
69 (*Bucher et al., 2005*; *Schulz et al., 2006*; *Tang et al., 2012*). The conservation of individual neuronal  
70 electrical output despite variable underlying ion channel conductance densities has furthermore  
71 been demonstrated in mammalian CNS neurons (*Swensen and Bean, 2005*), most likely arising  
72 from complex homeostatic mechanisms for maintaining circuit stability that are not fully under-  
73 stood. Therefore, how should one proceed in building cellular, computational models? Averaging  
74 of experimental variables such as conductance densities as a way of accounting for variability  
75 leads to erroneous conductance-based models (*Golowasch et al., 2002*). As a consequence, single,  
76 “canonical” biophysical models cannot capture inherent variability in the experimental ion channel  
77 data. A more desirable approach is to develop multiple models to capture the underlying biological  
78 variability (*Marder and Taylor, 2011*). Indeed, such populations of models representing a given cell  
79 type have been developed to examine, for example, co-regulations between different conductances  
80 that might exist in a given cell type (*Hay et al., 2011*; *Sekulić et al., 2014*; *Soofi et al., 2012*). In this  
81 way, populations of models could help suggest what balance of conductances are important for  
82 cellular dynamics and their function in circuits. Ideally, one should obtain biophysical properties  
83 of a given cell type using recordings from the *same* cell. It is of course unrealistic to consider an  
84 experimental characterization of all the various ion channel types using the same cell of a given  
85 cell type. This impracticality is further enhanced in consideration of channel types in the dendrites  
86 of neurons. Besides needing to patch from the same cell, there is also the practical limitations of

87 invasively investigating the biophysical characteristics of fine dendritic compartments. However,  
88 dendrites are where most synaptic contacts are made and where signal integration in neurons  
89 occurs (*Stuart and Spruston, 2015*). Thus, these aspects must be tackled along with considerations  
90 of cellular variability.

91 In this work we focus on the oriens-lacunosum/moleculare (OLM) cell, an identified inhibitory  
92 cell type in the hippocampal CA1 area (*Maccaferri and Lacaille, 2003; Müller and Remy, 2014*). OLM  
93 cells receive excitatory glutamatergic input predominantly from local CA1 pyramidal neurons and  
94 form GABAergic synapses onto the distal dendrites of CA1 pyramidal neurons, as well as onto  
95 other CA1 inhibitory cells (*Blasco-Ibáñez and Freund, 1995; Klausberger, 2009; Leão et al., 2012;*  
96 *Maccaferri et al., 2000*). Functionally, proposed roles of OLM cells include gating sensory and  
97 contextual information in CA1 (*Leão et al., 2012*), and supporting the acquisition of fear memories  
98 (*Lovett-Barron et al., 2014*). Moreover, OLM cell firing is phase-locked to the prominent theta  
99 rhythms in the hippocampus of behaving animals (*Katona et al., 2014; Klausberger et al., 2003;*  
100 *Klausberger and Somogyi, 2008; Varga et al., 2012*). Although it has long been known that OLM  
101 cells express hyperpolarization-activated cation channels (h-channels) (*Maccaferri and McBain,*  
102 *1996*), it is still unclear whether these channels are present in their dendrites. From a functional  
103 perspective, the consequences of dendritic h-channel expression in OLM cells was explored in our  
104 previous computational study where h-channels were found to modulate the spiking preference of  
105 OLM cell models – incoming inhibitory inputs recruited either a higher or lower theta frequency  
106 (akin to Type 1 or Type 2 theta, respectively - *Kramis et al. (1975)*) depending on the presence  
107 or absence of dendritic h-channels (*Sekulić and Skinner, 2017*). In that computational study, our  
108 OLM cell models were derived from previously built populations of OLM cell multi-compartment  
109 models in which appropriate OLM cell models were found with h-channels present either in the  
110 soma only or uniformly distributed in the soma and dendrites (*Sekulić et al., 2014*). We had  
111 previously leveraged these models and showed that appropriate OLM cell model output could be  
112 maintained, even if h-channel conductance densities and distributions co-vary, so long as total  
113 membrane conductance due to h-channels is conserved (*Sekulić et al., 2015*) – a finding that was  
114 also demonstrated in cerebellar Purkinje neurons (*Angelo et al., 2007*). Moreover, these OLM cell  
115 models were developed using morphological and electrophysiological data obtained from different  
116 OLM cells as well as h-channel characteristics from the literature, resulting in non-uniqueness of  
117 the fitted model parameters (*Holmes et al., 2006; Rall et al., 1992*). Prior to the work here, we  
118 did not actually know whether h-channels were present in the dendrites of OLM cells. Dendritic  
119 patch-clamp experiments have not yet been performed on OLM cells to determine their existence,  
120 and immunohistochemistry studies had so far demonstrated expression of the HCN2 subunit of  
121 h-channels only in the somata of OLM cells (*Matt et al., 2011*).

122 Considering all of the above, we aimed to build “next generation” multi-compartment models of  
123 OLM cells to achieve a two-pronged goal. First, we wanted to determine whether multi-compartment  
124 models built using morphological and electrophysiological data from the *same* cell would produce  
125 *consistent* results regarding h-channel localization to dendrites or not, and second, to determine  
126 the biophysical characteristics of h-channels in OLM cells. We considered our models to be next  
127 generation over previous multi-compartment OLM cell modelling efforts because each model was  
128 built using experimental data from the same cell, including its morphology, passive properties, and  
129 biophysical h-channel characteristics. Using transgenic mice in which yellow fluorescent protein  
130 (YFP) was expressed in somatostatin (SOM)-containing neurons, we visually targeted OLM cells  
131 from CA1 hippocampus, and fully reconstructed three OLM cells for multi-compartment model  
132 development with h-channel characteristics fit to each particular cell. We found that in order to  
133 be compatible with the experimental data, all three models needed to have h-channels present  
134 in their dendrites. Further, we performed immunohistochemical experiments that supported this  
135 prediction of dendritic h-channel expression in OLM cells. Finally, using two of these reconstructed  
136 models, we completed their development into full spiking models by including additional ion  
137 channel currents whose parameters were optimized based on voltage recordings from the same

138 cell. These resulting models and associated experimental data are publicly available and can be  
139 subsequently used to develop further insight into the biophysical specifics of OLM cells and to help  
140 understand their contributions to circuit dynamics and behaviour. This work also demonstrates the  
141 feasibility of combining experimental and computational studies to address the challenging issue  
142 of determining the density and distribution of specific dendritic ion channel types.

## 143 Results

### 144 YFP-positive stratum oriens interneurons from SOM-Cre/Rosa26YFP mice contain 145 a population of oriens-lacunosum/moleculare (OLM) cells

146 Patch-clamp recordings from 45 YFP-positive neurons in the stratum oriens of SOM-Cre/Rosa26YFP  
147 mice were obtained. Of these recordings, 11 of them met criteria for stability (see Methods) and  
148 were morphologically confirmed as OLM interneurons, having horizontal cell body and dendrites  
149 confined to the oriens layer, and perpendicularly projecting axons which ramify in the lacuno-  
150 sum/moleculare layer. Morphological and electrophysiological characteristics for three of these  
151 OLM cells are shown in **Figure 1**. An analysis of the 11 cells is given in **Table 1**. YFP-positive stratum  
152 oriens interneurons from SOM-CRE/Rosa26YFP mice had slow membrane time constants, and high  
153 input resistances, in accordance with our previous study (*Yi et al., 2014*). Action potential half-widths  
154 were larger and membrane time constants were slower than previously reported for YFP neurons  
155 from PV-CRE/Rosa26YFP mice, consistent with the exclusion of PV-positive basket and bistratified  
156 cells from this population. Moreover, this population had considerable hyperpolarization-induced  
157 sag, which, when combined with their higher input resistance, is considered a hallmark feature of  
158 OLM cells (*Maccaferri and Lacaille, 2003*).

**Table 1.** Passive and active properties of OLM cells from SOM-Cre/Rosa26YFP mice.

| <b>Property</b>                | <b>SOM-YFP (n=11)</b> |
|--------------------------------|-----------------------|
| $R_{in}$ (M $\Omega$ )         | 314.3 $\pm$ 33.8      |
| $C_m$ (pF)                     | 107.1 $\pm$ 13.0      |
| Sag ratio (SS/peak)            | 0.89 $\pm$ 0.03       |
| $\tau_m$ (ms)                  | 31.1 $\pm$ 2.5        |
| $I_{hold}$ (pA)                | 3.4 $\pm$ 4.8         |
| First AP half-width ( $\mu$ s) | 595.1 $\pm$ 26.4      |
| First AP height (mV)           | 66.0 $\pm$ 2.7        |
| Adaptation coefficient         | 0.5 $\pm$ 0.1         |
| Frequency at 90 pA (Hz)        | 15.5 $\pm$ 2.1        |
| Frequency at 60 pA (Hz)        | 8.3 $\pm$ 1.5         |
| Frequency at 30 pA (Hz)        | 2.1 $\pm$ 0.8         |

*Values are presented as means  $\pm$  SEM. Abbreviations:  $R_{in}$ , input resistance;  $\tau_m$ , membrane time constant; AP, action potential;  $C_m$ , membrane capacitance; SS, steady state;  $I_{hold}$ , the current injected to hold the recorded cell at -60 mV (not junction potential corrected). Passive properties were extracted at a current injection of -60 pA. Active properties were extracted at a current injection of 90 pA, unless otherwise specified. APs were detected at a derivative threshold of 20 mV/ms. The adaptation coefficient was calculated by dividing the first inter-spike interval by the last inter-spike interval of the AP train during current injection of 90 pA.*

### 159 Multi-compartment model fits to the charging portion of the membrane potential 160 describe passive membrane responses

161 From the 11 usable cells (**Table 1**), three cells were selected for multi-compartment model develop-  
162 ment (**Cell 1**, **Cell 2**, **Cell 3**). We used the NEURON simulation environment (*Hines and Carnevale,*

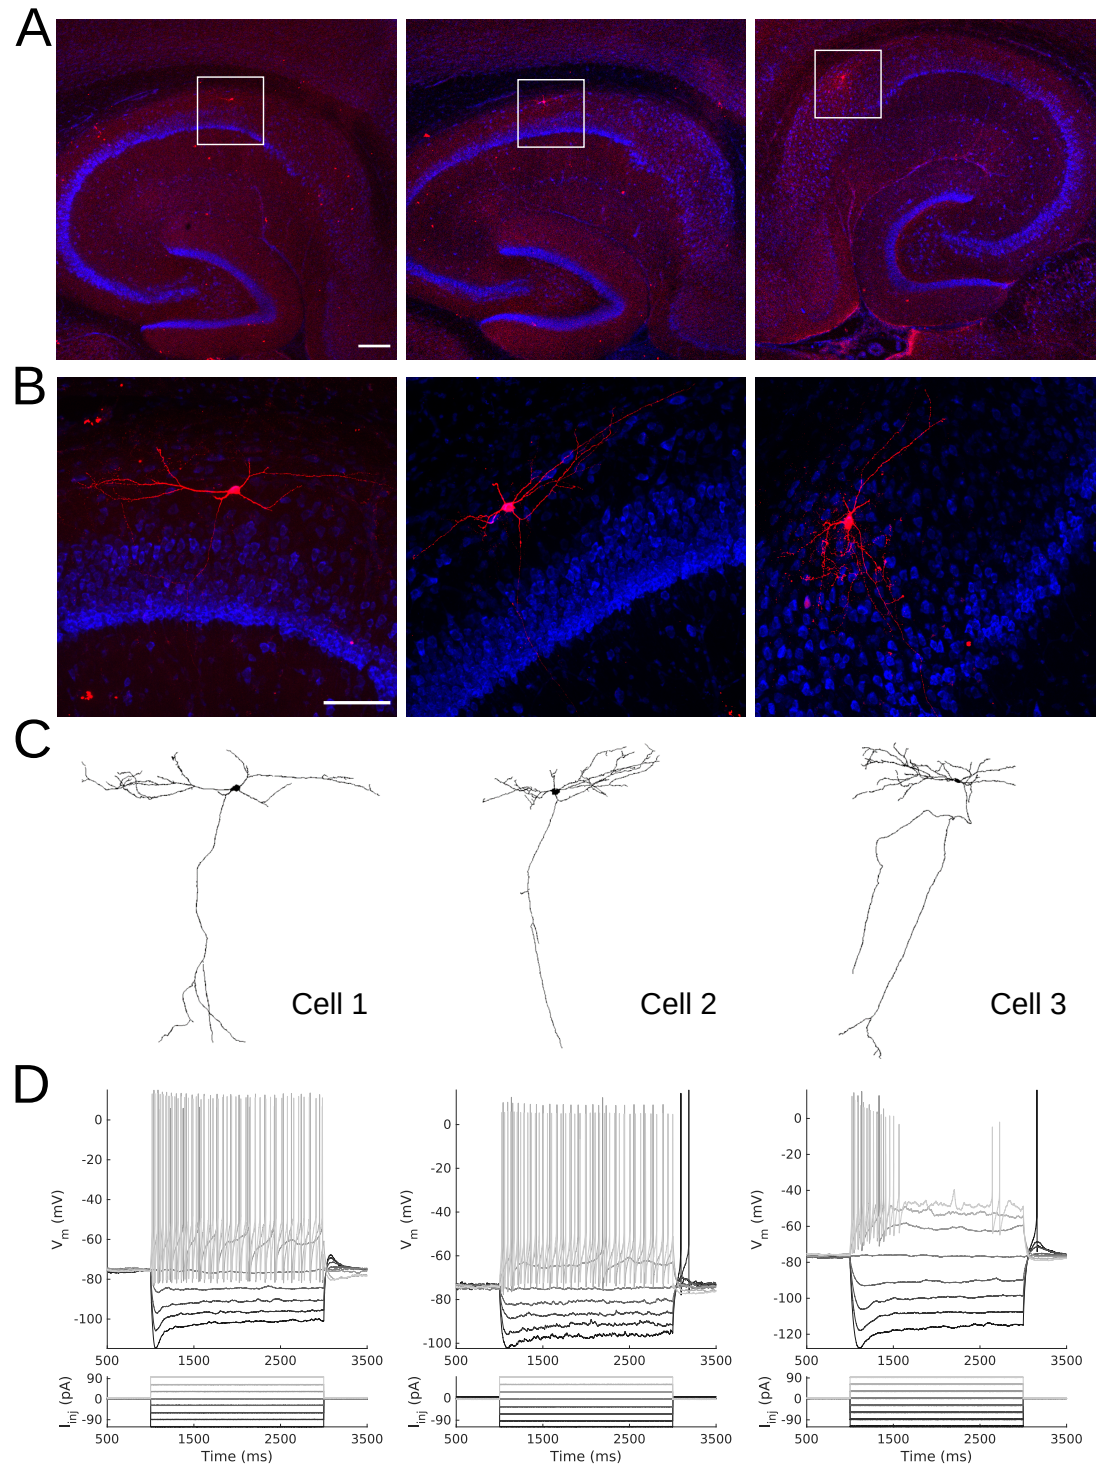

**Figure 1. Morphology and Electrophysiology of OLM interneurons.**

Confocal images of OLM cells at **A.** 4X and **B.** 25X magnification, corresponding to *Cell 1*, *Cell 2*, and *Cell 3* (respectively, left, middle, and right - ordering of cells are the same for remainder of figure). Squares in **A.** indicate boundaries of zoomed images in **B.** Scale bars: 200  $\mu$  and 100  $\mu$  for **A.** and **B.**, respectively. **C.** Reconstructed morphologies for the three cells. **D.** Membrane potential ( $V_m$ ) traces in response to current clamp injections in the presence of synaptic blockers showing intrinsic electrophysiological properties.

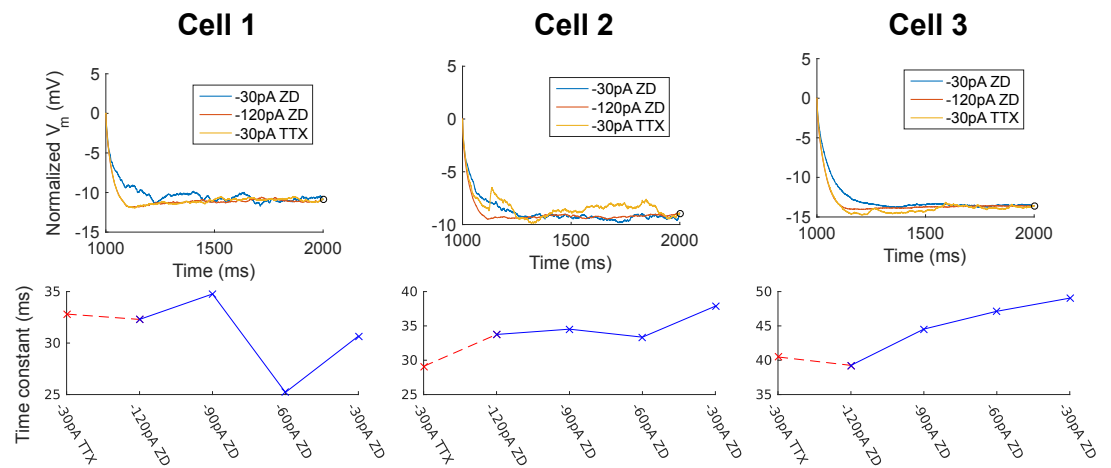

**Figure 2. Passive Properties, Membrane Time Constants.**

(Top) Membrane potential ( $V_m$ ) normalized at steady-state, showing noisier responses of -30pA ZD trace (from protocol #7 in [Table 5](#)) compared to the -120pA ZD trace. (Bottom) Fitted membrane time constants ( $\tau_m$ ) for all current clamp steps with ZD7288 application, as well as the -30pA TTX trace (from protocol #4 in [Table 5](#)), i.e., current clamp step without ZD7288 application, but with other channel blockers present: TTX/4-AP/TEA.

**Figure 2-Figure supplement 1.** Comparison of charging portions of membrane potential ( $V_m$ ) for fitting model passive responses.

**Figure 2-Figure supplement 2.** Model membrane potential responses with scaled dendritic diameters and both unchanged and refitted passive properties.

163 **2001**) to develop our multi-compartment models. [Figure 1A,B](#) shows imaging of the three chosen  
 164 cells, with the reconstructed cell morphologies shown in [Figure 1C](#), and typical electrophysiological  
 165 OLM cell profiles with sag characteristics shown in [Figure 1D](#). Details of the model reconstructions  
 166 are given in the Methods.

167 To capture the passive response of the three cells we used long -120 pA current clamp traces in  
 168 which all synaptic and voltage-gated channels were blocked. This choice was made because we  
 169 found that the -30 pA traces were noisier in general (see [Figure 2](#), top panels), and the -120 pA  
 170 traces best captured the passive response of the cells. This can be seen from a comparison of the  
 171 membrane time constants ( $\tau_m$ ) for different current clamp steps (see [Figure 2](#), bottom panels) and  
 172 consideration of the protocol ordering of the recording session. Full details are provided in the  
 173 Methods. The resulting fitted passive parameters of axial resistivity ( $R_a$ ), specific capacitance ( $C_m$ ),  
 174 leak conductance ( $G_{pas}$ ) and leak reversal potential ( $E_{pas}$ ) (see [Table 6](#) in Methods, top of [Table 2](#)  
 175 and as summarized in [Table 4](#) later) in conjunction with the respective cell morphologies form the  
 176 “backbone” of the OLM cell models.

### 177 **Low specific capacitances are a robust feature of OLM cells**

178 From our model fits we found that the  $C_m$ 's obtained were much lower than the  $\approx 0.9\text{-}1\mu\text{F}/\text{cm}^2$   
 179 that have been previously reported as a “standard” value in mammalian neurons ([Gentet et al.,](#)  
 180 [2000](#)). These values indicated the possibility of errors in the process of reconstructing the cell  
 181 morphologies. In particular, we investigated our estimations of dendritic diameter, which is a  
 182 particularly prominent source of possible errors in morphological reconstruction of neurons ([Jaeger,](#)  
 183 [2001](#)). For instance, although fine dendritic processes with diameters between 0.5 and  $2\mu\text{m}$  can  
 184 be resolved using confocal microscopy, their apparent diameters will generally seem larger than  
 185 their true size due to the point spread function of the optical system ([Jacobs et al., 2010](#)). To assess  
 186 whether our low fitted  $C_m$  values reflected compensation for overestimated dendritic diameters  
 187 or whether they may reflect lower specific capacitance in biological OLM cells, we turned to cable  
 188 theoretic considerations.

189 **Holmes et al. (2006)** showed that when either the diameter  $d$  or length  $l$  are multiplied by a  
 190 constant factor  $x$ , the derived changes in membrane resistivity ( $R_m$ ),  $R_a$ , and  $C_m$  needed to maintain  
 191 an identical voltage response occur when  $R_m$  is scaled by  $x$ ,  $C_m$  by  $1/x$ , and  $R_a$  by  $x^2$ . Note that  
 192 since  $G_{pas}$  corresponds to the inverse of  $R_m$ , the necessary change for  $G_{pas}$  is rather to scale it by  
 193  $1/x$ . If we consider re-scaled dendritic diameters of our OLM models by scaling values ( $d_s$ ) of 0.5  
 194 and 1.5 to represent large changes, and 0.9 and 1.1 to represent small changes, the resulting  
 195 values of  $G_{pas}$ ,  $C_m$ , and  $R_a$  as predicted by cable theory are shown in **Table 2**. To confirm these  
 196 predictions, we first re-scaled the original reconstructed diameters for each compartment in two  
 197 of the models (*Cell 1* and *Cell 2*) using these four scaling values (0.5, 1.5, 0.9, 1.1). We used our  
 198 unchanged passive properties previously obtained and examined the responses to a -120pA current  
 199 clamp step. This served to assess the resulting changes in the  $V_m$  responses attributable to errors in  
 200 electrotonic properties solely due to changing the diameters. We found that changes in diameters  
 201 produced deviations in the  $V_m$  response roughly proportional to the magnitude of the scaled  
 202 dendritic diameters (**Figure 2-Figure Supplement 2A**). The largest change was when the diameters  
 203 were halved across all compartments ( $d_s = 0.5$ ). We then re-fitted the passive properties of the  
 204 two models under each case of re-scaled dendritic diameters, obtaining nearly identical model  $V_m$   
 205 responses to the -120pA current clamp step (**Figure 2-Figure Supplement 2B**). We found that the  
 206 refitted values of  $R_m$ ,  $C_m$ , and  $R_a$  for the various cases of scaled dendritic diameters,  $d_s$ , were in  
 207 excellent agreement with the values predicted by cable theory (**Table 2**). Thus, we were able to use  
 208 the cable theoretic predictions to provide implicit limits on how much the fitted parameters could  
 209 be expected to deviate solely due to errors in morphological considerations.

**Table 2.** Re-fitted passive properties for models with scaled dendritic diameters.

|               |            | <b>fitted values</b> |                             |                                     |                                      |                | <b>cable theory</b>           |                                       |                                        |  |
|---------------|------------|----------------------|-----------------------------|-------------------------------------|--------------------------------------|----------------|-------------------------------|---------------------------------------|----------------------------------------|--|
|               | $d_s$      | RMSE (mV)            | $R_a$ ( $\Omega\text{cm}$ ) | $C_m$ ( $\mu\text{F}/\text{cm}^2$ ) | $G_{pas}$ ( $\text{S}/\text{cm}^2$ ) | $E_{pas}$ (mV) | $R_a^*$ ( $\Omega\text{cm}$ ) | $C_m^*$ ( $\mu\text{F}/\text{cm}^2$ ) | $G_{pas}^*$ ( $\text{S}/\text{cm}^2$ ) |  |
| <b>Cell 1</b> | <b>1.0</b> | 0.3602               | 141.85                      | 0.2698                              | $7.933 \times 10^{-6}$               | 49.05          |                               |                                       |                                        |  |
|               | 0.5        | 0.3665               | 36.87                       | 0.5278                              | $1.556 \times 10^{-5}$               | 49.09          | 35.46                         | 0.5396                                | $1.586 \times 10^{-5}$                 |  |
|               | 1.5        | 0.3959               | 386.51                      | 0.1592                              | $4.768 \times 10^{-6}$               | 49.28          | 319.16                        | 0.1799                                | $5.288 \times 10^{-6}$                 |  |
|               | 0.9        | 0.3766               | 121.35                      | 0.2802                              | $8.342 \times 10^{-6}$               | 49.18          | 114.89                        | 0.2998                                | $8.814 \times 10^{-6}$                 |  |
|               | 1.1        | 0.3827               | 195.82                      | 0.2269                              | $6.750 \times 10^{-6}$               | 49.20          | 171.63                        | 0.2453                                | $7.211 \times 10^{-6}$                 |  |
| <b>Cell 2</b> | <b>1.0</b> | 0.9818               | 285.78                      | 0.2799                              | $9.242 \times 10^{-6}$               | 54.74          |                               |                                       |                                        |  |
|               | 0.5        | 0.9104               | 64.78                       | 0.6484                              | $2.085 \times 10^{-5}$               | 54.60          | 72.44                         | 0.5598                                | $1.848 \times 10^{-5}$                 |  |
|               | 1.5        | 1.0486               | 707.21                      | 0.1624                              | $5.480 \times 10^{-6}$               | 54.85          | 643.01                        | 0.1866                                | $6.161 \times 10^{-6}$                 |  |
|               | 0.9        | 0.9676               | 226.97                      | 0.3201                              | $1.051 \times 10^{-5}$               | 54.71          | 231.48                        | 0.3110                                | $1.029 \times 10^{-5}$                 |  |
|               | 1.1        | 0.9958               | 350.50                      | 0.2470                              | $8.198 \times 10^{-6}$               | 54.77          | 345.79                        | 0.2545                                | $8.401 \times 10^{-6}$                 |  |

$d_s$  is the scaled diameter.  $R_a^*$ ,  $C_m^*$  and  $G_{pas}^*$  are the values as predicted from cable theory and are given by  

$$R_a^* = R_a \times d_s^2, C_m^* = C_m \times 1/d_s, \text{ and } G_{pas}^* = G_{pas} \times 1/d_s$$

210 All of our models were found to have consistent but low  $C_m$  values as shown in **Table 6** (0.27 for  
 211 *Cell 1*, 0.28 for *Cell 2*, and 0.31 for *Cell 3*, units of  $\mu\text{F}/\text{cm}^2$ ). Let us suppose that the diameter estimates  
 212 in our morphological reconstructions were nevertheless overestimates of the true diameters. Then,  
 213 the cable theoretic predictions, as confirmed by our simulations, would suggest that even if we  
 214 halved the average diameters, the expected  $C_m$  in the cells would only increase to about  $0.58 \mu\text{F}/\text{cm}^2$ ,  
 215 taking the average of the re-fitted  $C_m$  of *Cell 1* and *Cell 2*. We considered it unlikely that our diameters  
 216 were this much in error. That is, a scaling factor of 0.5 implies that the minimum diameter, which is  
 217  $0.35 \mu\text{m}$  in *Cell 1* and  $0.32 \mu\text{m}$  in *Cell 2*, would had to have been reduced to  $0.17 \mu\text{m}$  and  $0.16 \mu\text{m}$   
 218 for *Cell 1* and *Cell 2*, respectively, which are unreasonably small. If we nevertheless consider these

219 scaled diameter values as possible ranges, we are led to the consideration that  $C_m$  in OLM cells  
220 may be within the range of 0.2-0.6  $\mu\text{F}/\text{cm}^2$ . We also note that if we compute  $C_m$  for these three cells  
221 directly from experimental capacitance and surface area values, then they are also low, as shown  
222 in **Table 3**. Due to these analyses, we decided to keep the values of  $C_m$  obtained from the passive  
223 property fitting procedure for each model as we proceeded to build upon this passive backbone.

**Table 3.** Specific capacitance computed directly from experiment.

| <b>Parameter</b>                    | <b>Cell 1</b> | <b>Cell 2</b> | <b>Cell 3</b> |
|-------------------------------------|---------------|---------------|---------------|
| Capacitance (pF)                    | 62.8          | 123.7         | 79.6          |
| Surface area ( $\mu\text{m}^2$ )    | 29,378.1      | 35,158.5      | 21,990.3      |
| $C_m$ ( $\mu\text{F}/\text{cm}^2$ ) | 0.21          | 0.35          | 0.36          |

*Capacitance properties were extracted at a current injection of -60 pA.*

### 224 **H-channels inserted into OLM cell models with constrained passive properties do** 225 **not yield ideal fits**

226 Using h-channel current ( $I_h$ ) parameter values estimated from the experimental data (see Methods),  
227 we inserted h-channels into our OLM cell multi-compartment models' 'backbone' of morphological  
228 reconstructions and passive property fits. The h-channel parameters extracted from each of the  
229 OLM cells in this work included the  $I_h$  reversal potential ( $E_h$ ), the time constants of activation and  
230 deactivation of  $I_h$  ( $\tau_h$ ), the steady-state activation curve of  $I_h$  ( $r_\infty$ ), and the  $I_h$  maximum conductance  
231 density ( $G_h$ ) (**Figure 3**).

232 We demonstrated in our previous work that OLM cell models exhibited a tradeoff between total  
233 membrane  $G_h$  and the dendritic distribution of h-channels so that if the total  $G_h$  was conserved,  
234 the resulting model output would be appropriate (**Sekulić et al., 2015**). Now, for the first time, we  
235 have a measure of total  $G_h$ . Thus, a key prediction for the resulting multi-compartment models is  
236 that the total  $G_h$  will constrain the distribution of h-channels to allow the models to appropriately  
237 capture the OLM cell electrophysiological characteristics. To consider this, we added an additional  
238 parameter to our models termed  $H_{dist}$ , which is defined as the centripetal extent for which h-  
239 channels are inserted in the dendrites. It is defined by a real-valued number in the range of [0, 1]  
240 and represents the fraction of maximum dendritic path length from the soma on a per-cell basis.  
241 Compartments with a path length from the soma that was smaller than any given  $H_{dist}$  value were  
242 included when subsequently inserting h-channels, whereas those compartments whose distance  
243 from soma exceeded  $H_{dist}$  were excluded. The boundary condition of  $H_{dist} = 0$  is defined as the case  
244 where h-channels are only present in somatic compartments and not present in the dendrites. A  
245 non-zero value for  $H_{dist}$  meant that the amount of dendrite specified by  $H_{dist}$  itself had h-channels  
246 in addition to the somatic compartments.  $H_{dist} = 1$  refers to full somatodendritic presence of  
247 h-channels, i.e., uniform distribution in the dendrites and soma. The per-cell  $I_h$  parameters were  
248 inserted into each of the three models and two cases of  $H_{dist}$  were initially considered to test the  
249 boundary cases: either no dendritic h-channels ( $H_{dist} = 0$ ) or full, uniform distribution of h-channels  
250 in the dendrites ( $H_{dist} = 1$ ). The resulting h-channel conductance density was calculated by dividing  
251 total  $G_h$  by the resulting surface area of only somatic or somatodendritic compartments. These  
252 values and the other h-channel parameters are given in **Table 8** in the Methods. The  $V_m$  output of  
253 each of the three models being developed here, with boundary conditions of  $H_{dist} = 0$  or 1 for the  
254 case of -120pA current clamp injection, compared to the experimental TTX trace for each cell, is  
255 shown in **Figure 4A**. These models do not fully match the experimental traces. Although we did  
256 explore  $H_{dist}$  values that were between 0 and 1 (not shown), it is clear that given the fits shown in  
257 **Figure 4A**, it is unlikely that changing  $H_{dist}$  to a value between 0 (somatic expression only) to 1 (full  
258 somato-dendritic expression) would improve the fits to the experimental data.



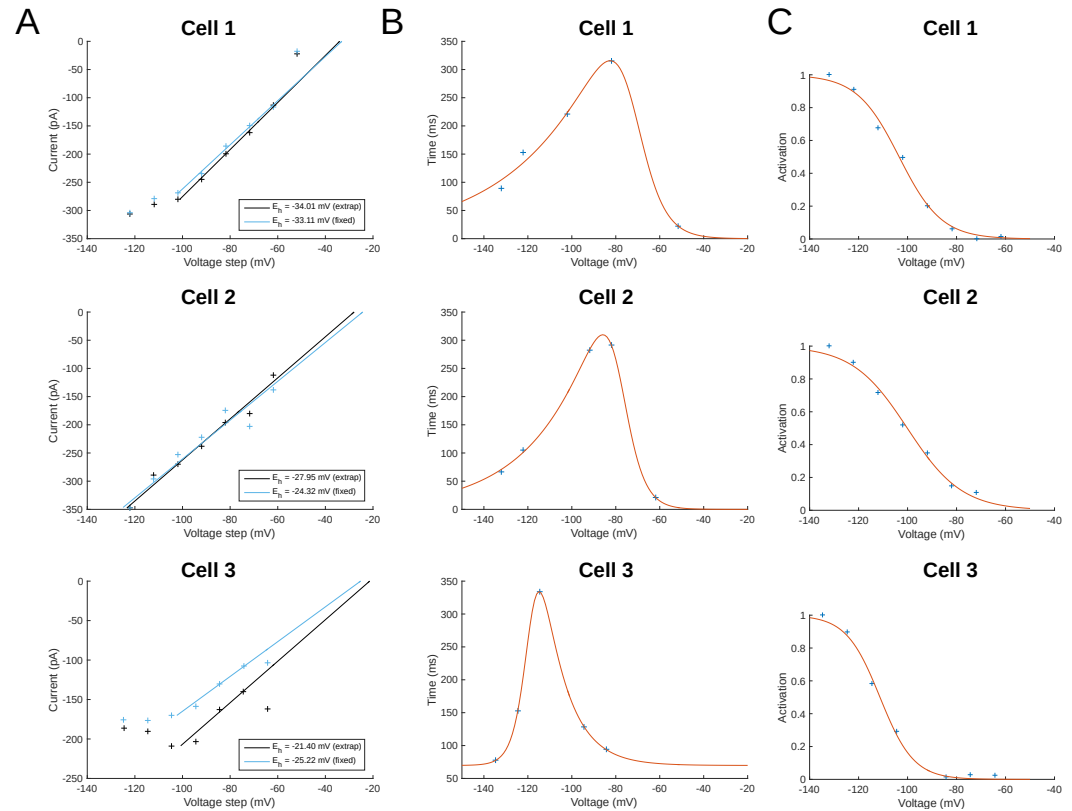

**Figure 3.  $I_h$  Properties from Fitting to Experimental Data.**

**A.**  $I_h$  reversal potential as determined from current-voltage obtained from tail currents. See text in Methods for difference between 'extrap' and 'fixed' values in plots. **B.** Time constants ( $\tau_h$ ) or kinetics of activation and deactivation. **C.** Steady-state activation curves ( $r_\infty$ ).

**Figure 3-Figure supplement 1.** Experimental traces and fits for reversal potential and time constants of activation and deactivation.

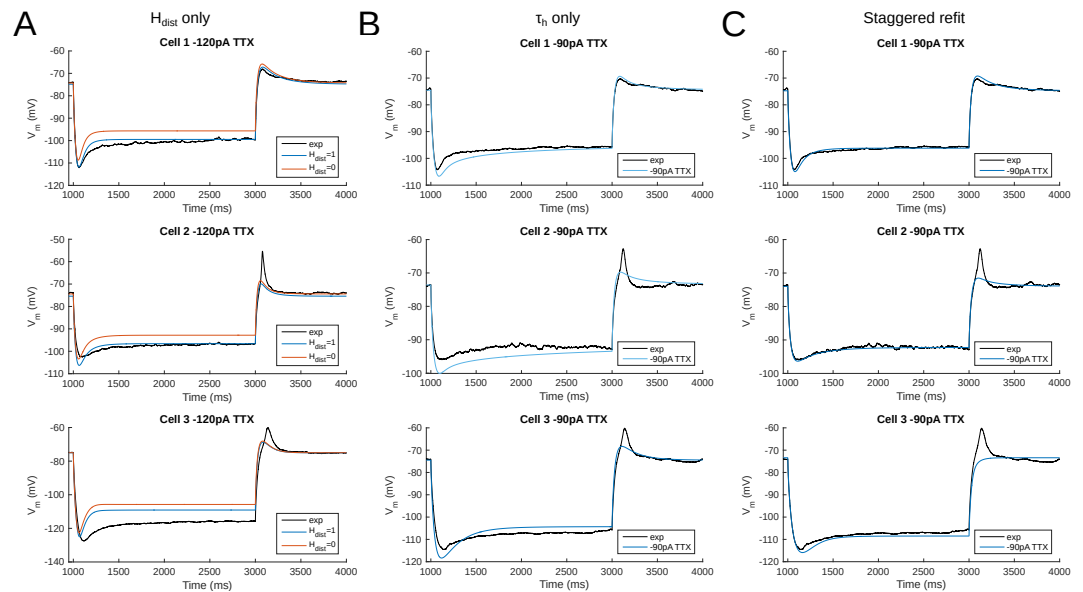

**Figure 4. Fitting and Staggered Re-fitting of  $I_h$  and Passive Property Parameters Show That Only OLM Cell Models with Dendritic H-channels Reproduce Experimental Traces.**

**A.** Boundary conditions of  $H_{dist}$  parameter [0, 1] showing inappropriate fits when putting all experimentally derived parameters together. **B.** Re-fitting only  $\tau_h$  does not provide good fits ( $H_{dist}=1$ ). **C.** Staggered re-fitting of parameters results in good fits. Shown in B and C are -90pA TTX traces which are “test” traces not used for fitting (-120pA TTX trace was used for fitting).

**Figure 4–Figure supplement 1.** Simultaneous fitting of all passive and  $I_h$  parameters leads to overfitting of the experimental traces and poor model generalization - Cell 3 as an example.

**Figure 4–Figure supplement 2.** Traces for Cell 1 model compared to experiment after staggered re-fitting.

**Figure 4–Figure supplement 3.** Traces for Cell 2 model compared to experiment after staggered re-fitting.

**Figure 4–Figure supplement 4.** Traces for Cell 3 model compared to experiment after staggered re-fitting.

259 **A staggered re-fitting procedure yields consistent and generalized model fits for**  
260 **OLM cells with dendritic h-channels**

261 Given the suboptimal match of our models with the experimental data, even with model parameters  
262 determined from experiment on a per-cell basis, we considered the possibility that one or more  
263 of the parameters were mismatched between the experimental cells and the parameter values  
264 derived from the recordings. We considered re-fitting the various parameters in the model to  
265 ensure that  $I_h$  and passive parameters resulted in correct output for each cell. However, due to the  
266 sheer number of parameters present in the model, care needed to be taken in how the parameters  
267 were adjusted as there are many interdependencies between the fitted parameters. For instance,  
268 when  $I_h$  is present, the trajectory of the  $V_m$  response upon a step of hyperpolarizing current in a  
269 cell depends not just on  $C_m$  and  $R_a$ , but also on the time constants of activation and deactivation  
270 of h-channels ( $\tau_h$ ) and, to a degree, the h-channel steady-state activation curve ( $r_\infty$ ). Therefore, if  
271 there is error in the model  $V_m$  response compared to the experimental trace in this portion of the  
272 trace (**Figure 4A**), the mismatch between model and experiment may have been either due to the  
273 passive parameters, or due to  $\tau_h$  or  $G_h$ , which gated by the activation, determines the amount of  $I_h$ .  
274 The problem, then, is how to attribute errors in any particular portion of a  $V_m$  trace to any given  
275 parameter in the model.

276 We noted that the initial mismatch in the case of  $H_{dist}=1$  and for *Cell 1* and *Cell 2* seem primarily  
277 to be located in the initial hyperpolarizing phase and the sag portion. Because the  $\tau_h$  functions  
278 were constructed using a limited set of data, it was reasonable to suppose that a large source of  
279 mismatch in this portion of  $V_m$  could be due to errors in the  $\tau_h$  function itself. We thus re-fitted the  
280 parameters for  $\tau_h$ , namely  $t_1, t_2, t_3, t_4, t_5$  for all three cells, against each respective -120pA trace and  
281 then compared the models' responses to the other current clamp steps to see how much of the  
282 error could be accounted for by re-fitting  $\tau_h$  alone (**Figure 4B**). This re-fitting of  $\tau_h$  alone could not  
283 address the mismatch in  $V_m$  between model and experiment although it may have played some  
284 role, as evidenced by improving the match in  $V_m$  in some cases. Thus other parameter re-fitting  
285 needed to be considered. Detailed considerations including "overfitting" are given in the Methods.

286 We adopted the following approach and rationale. Since the passive properties were not as  
287 tightly constrained as the  $I_h$  properties, and could account for some of the mismatch in both the  
288 transient and steady state portions of the traces, we re-fitted them first. That is,  $R_a, C_m, G_{pas}, E_{pas}$ .  
289 Turning to the  $I_h$  properties, we first re-fitted the total  $G_h$ , which determines the per-compartment  
290 conductance density, as well as the steady-state activation curve  $r_\infty$  since it determines the voltage  
291 dependency of how many channels are open. We could not fit  $G_h$  and  $r_\infty$  in the reverse order  
292 because any error in  $G_h$  – that is, how  $I_h$  scales with voltage when all channels are opened – could  
293 be accounted for by refitting  $r_\infty$  by "flattening" it, thus lowering the total number of channels that  
294 are open at any given voltage. This would not be physiologically correct since the model would then  
295 imply that  $I_h$  is never fully activated, i.e.,  $r_\infty$  does not reach 1. Thus, by re-fitting  $G_h$  first, followed by  
296  $r_\infty$ , we increased the likelihood that  $r_\infty$  did not diverge too much from the experimental data points  
297 obtained from the protocol for  $I_h$  activation. Finally, we re-fitted  $\tau_h$ . If the passive properties and  
298 steady-state  $I_h$  due to  $G_h$  and  $r_\infty$  accounted for much of the mismatch in  $V_m$ , then the last step of  
299 re-fitting  $\tau_h$  should allow for any mismatch due to  $\tau_h$  to be corrected for.

300 Using this approach, which we termed a "staggered" re-fitting, we show the model outputs in  
301 **Figure 4C** where only the -120 pA TTX traces were used for fitting the parameters, with the -90pA TTX  
302 traces provided test data to validate the fits. We note that the results with this approach were more  
303 successful than the previous approaches. By fitting the parameters in such a way that the ones most  
304 likely to be responsible for errors in particular portions of the mismatched model  $V_m$  traces were  
305 fitted first, the resulting fits were more generalizable than the case of either re-fitting the passive  
306 properties alone, or re-fitting  $\tau_h$  alone, since the staggered re-fitted values were able to match all  
307 of the other current clamp traces that were not used for fitting. This is shown in **Figure 4-Figure**  
308 **Supplement 2** for *Cell 1*, **Figure 4-Figure Supplement 3** for *Cell 2*, and **Figure 4-Figure Supplement 4**

**Table 4.** Comparison of final fitted model parameters using either  $H_{dist}=0$  or  $H_{dist}=1$ , and with model parameters before staggered re-fitting (**Table 6** and **Table 8**), starting fits, shown here for easy reference.

| Parameter                            | Cell 1                |                       |                       | Cell 2                |                       |                       | Cell 3                |                       |                       |
|--------------------------------------|-----------------------|-----------------------|-----------------------|-----------------------|-----------------------|-----------------------|-----------------------|-----------------------|-----------------------|
|                                      | Starting Fits         | $H_{dist}=0$          | $H_{dist}=1$          | Starting Fits         | $H_{dist}=0$          | $H_{dist}=1$          | Starting Fits         | $H_{dist}=0$          | $H_{dist}=1$          |
| $R_a$ ( $\Omega\text{cm}$ )          | 141.85                | 34.4                  | 125.2                 | 285.78                | 285.4                 | 348.1                 | 94.83                 | 211.8                 | 317.9                 |
| $C_m$ ( $\mu\text{F}/\text{cm}^2$ )  | 0.27                  | 0.20                  | 0.27                  | 0.27                  | 0.37                  | 0.38                  | 0.30                  | 0.52                  | 0.58                  |
| $G_{pas}$ ( $\text{S}/\text{cm}^2$ ) | $7.93 \times 10^{-6}$ | $7.36 \times 10^{-6}$ | $7.58 \times 10^{-6}$ | $9.24 \times 10^{-6}$ | $1.16 \times 10^{-5}$ | $1.19 \times 10^{-5}$ | $7.48 \times 10^{-6}$ | $8.26 \times 10^{-6}$ | $8.68 \times 10^{-6}$ |
| $E_{pas}$ (mV)                       | -49.0                 | -64.0                 | -64.6                 | -54.7                 | -61.5                 | -61.8                 | -69.1                 | -75.7                 | -76.1                 |
| $E_h$ (mV)                           | -34.0                 | -34.0                 | -34.0                 | -27.9                 | -27.9                 | -27.9                 | -25.2                 | -25.2                 | -25.2                 |
| $V_{1/2}$ (mV)                       | -103.4                | -103.1                | -103.7                | -100.1                | -100.6                | -99.6                 | -111.3                | -108.4                | -113.8                |
| $k$ (mV)                             | 8.63                  | 9.99                  | 9.99                  | 11.16                 | 9.93                  | 9.99                  | 6.88                  | 9.39                  | 9.99                  |
| $t_1$ (ms)                           | 8.03                  | 12.30                 | 8.56                  | 8.98                  | 12.73                 | 11.28                 | 35.09                 | 36.77                 | 41.84                 |
| $t_2$ (ms)                           | 0.025                 | 0.063                 | 0.029                 | 0.035                 | 0.071                 | 0.056                 | 0.24                  | 0.25                  | 0.29                  |
| $t_3$ (ms)                           | -4.40                 | -22.87                | -6.91                 | -8.49                 | -20.38                | -19.28                | -4.28                 | -3.22                 | -4.03                 |
| $t_4$ (ms)                           | 0.15                  | 0.39                  | 0.18                  | 0.19                  | 0.36                  | 0.34                  | 0.088                 | 0.084                 | 0.089                 |
| $t_5$ (ms)                           | $7.32 \times 10^{-6}$ | 0.026                 | $4.35 \times 10^{-5}$ | $3.57 \times 10^{-7}$ | $3.54 \times 10^{-6}$ | 0.006                 | 69.72                 | 5.69                  | 4.29                  |
| <b>Total <math>G_h</math></b>        | <b>4.17</b>           | <b>1.91</b>           | <b>3.12</b>           | <b>3.64</b>           | <b>0.75</b>           | <b>2.14</b>           | <b>2.20</b>           | <b>0.77</b>           | <b>1.82</b>           |

309 for Cell 3. As shown in **Figure 4B** and **Figure 4-Figure Supplement 1**, the other approaches clearly  
 310 cannot capture other current clamp traces not used for the fitting. All of these staggered re-fitted  
 311 values are shown in **Table 4**,  $H_{dist}=1$  column.

312 All the models in the staggered re-fit were done with  $H_{dist}=1$ , because that value was the one that  
 313 provided the closest fit to the experimental traces (**Figure 4A**) when only passive properties were  
 314 fit to the  $V_m$  traces and  $I_h$  parameter values were obtained from the voltage clamp protocols. We  
 315 examined whether using  $H_{dist}=0$  and applying our staggered re-fitting approach could also produce  
 316 good, generalizable fits to the experimental data. The models with  $H_{dist}=0$  fitted the experimental  
 317  $V_m$  traces well in all four current clamp steps as it did for  $H_{dist}=1$ , and we show the comparison to  
 318 the -90pA TTX trace for  $H_{dist}$  values of both 0 and 1 in **Figure 5A**, noting that the -120 pA TTX trace  
 319 was used for the fitting. The staggered re-fitted values for  $H_{dist}=0$  are also shown in **Table 4**. From a  
 320 comparison across **Table 4** of parameter values for  $H_{dist}=0, 1$  and original  $I_h$  parameter values fit to  
 321 the experimental data, it is clear that the re-fitted parameter values using  $H_{dist}=0$  are inappropriate.  
 322 Specifically, the total  $G_h$  (shown in bold in **Table 4**) for the case of  $H_{dist}=1$  was reasonably close to  
 323 what was measured directly from the I-V plot of the reversal potential experimental protocol, unlike  
 324  $H_{dist}=0$ , which exhibited  $G_h$  values that were much less than half of the experimentally-derived  
 325 values. Given that this parameter was taken from the slope of the I-V plot, the values from  $H_{dist}=0$ ,  
 326 if correct, would imply that the recorded current values were double the “true” values in the cell.  
 327 This is graphically depicted in **Figure 5B**. We deemed this unlikely, and concluded that the relatively  
 328 small divergence in the re-fitted  $G_h$  with  $H_{dist}=1$  compared to the experimental case indicated a  
 329 much more reasonable error. Hence, the fact that it was possible to match the experimental  $V_m$   
 330 traces using both  $H_{dist}=0$  and  $H_{dist}=1$  did not mean that they were equally valid. The benefit of  
 331 having directly measured experimental values representing  $G_h, \tau_h, r_\infty$  from the *same* cell meant  
 332 that we could confidently state that models with  $H_{dist}=0$ , though they fitted the  $V_m$  traces, were not  
 333 appropriate models because they did not match the experimentally-derived values. Thus, only when  
 334 h-channels were spread into the dendrites did we find models whose  $V_m$  responses matched the  
 335 experimental traces and whose total  $G_h$  and other parameter values were in reasonable agreement  
 336 with the experimentally measured values. We thus predict that the experimental cells in the dataset  
 337 used here have h-channels expressed in their dendrites, with biophysical characteristics as given in  
 338 **Table 4**,  $H_{dist}=1$ .

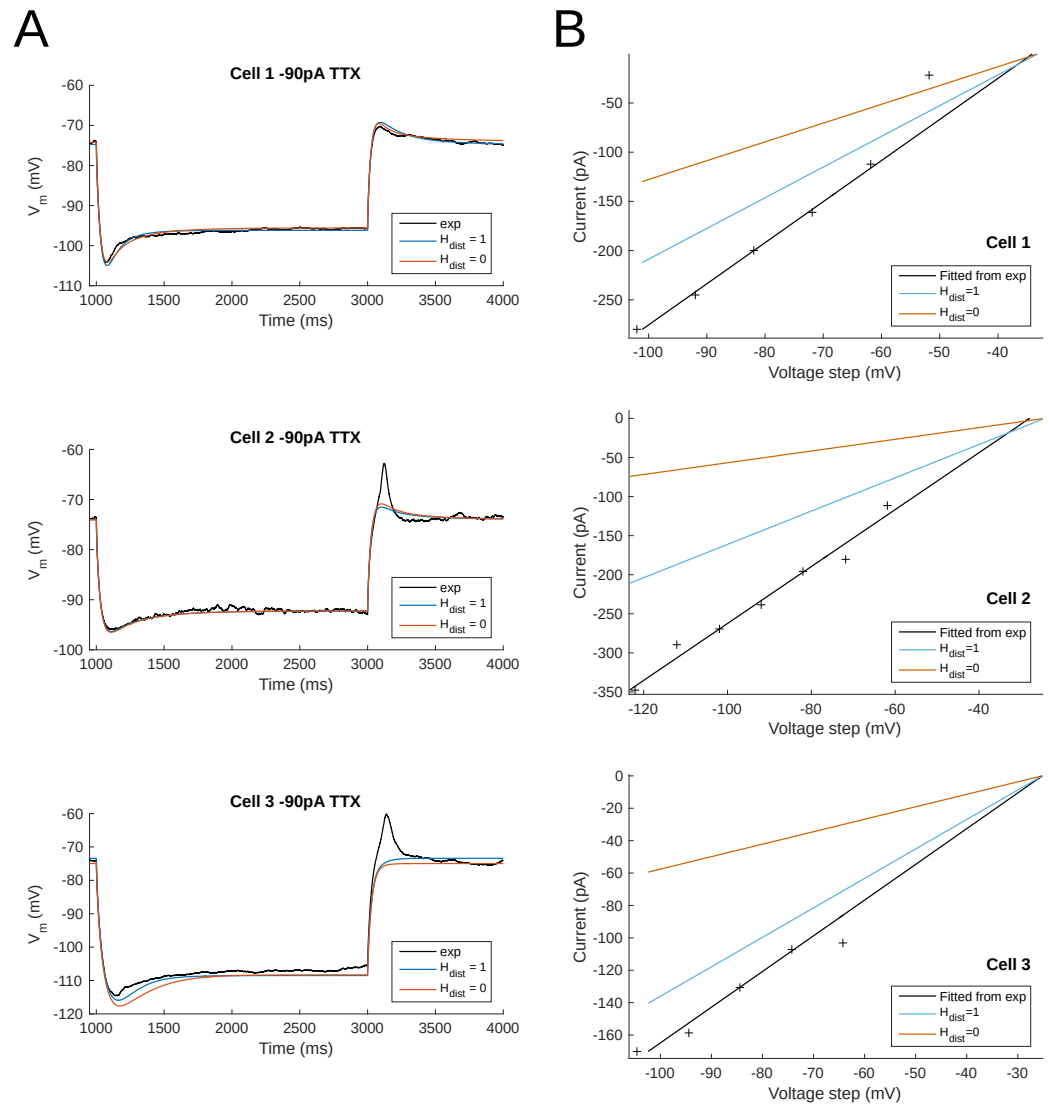

**Figure 5. Only OLM Cell Models with Dendritic H-channels are Experimental Data Appropriate.**

**A.** Using a staggered re-fitting, both  $H_{dist}=0$  or 1 are good fits to the experimental data. Note that the -90pA TTX traces are “test” traces and were not used for fitting (-120pA TTX used for fitting),  $H_{dist}=0$  or 1. **B.**  $H_{dist}=1$  is clearly more appropriate than  $H_{dist}=0$  relative to the experimental data as shown in plotting I-V curves.

339 **Immunohistochemistry reveals dendritic HCN2 channel expression in OLM cells**  
340 H-channels are encoded in HCN genes (HCN1-4) (*Santoro et al., 2000; Santoro and Baram, 2003*).  
341 For all three cells where the h-channel experimental data was analyzed, the slowest component of  
342 the time constant activation function is around 300 ms, whereas the fast component is less than  
343 100 ms for all three cells. These values coincide with the fast component of the time constant of  
344 activation of  $I_h$  measured in CA1 pyramidal neurons and oriens/alveus interneurons (of which OLM  
345 cells are a population); in both cases, about 100 ms was the fast component and is indicative of  
346 heteromeric isoforms of HCN1 and HCN2 subtypes (*Santoro et al., 2000*). Thus, the biophysical  
347 properties of  $I_h$  were most consistent with the expression of HCN1 and HCN2 channels.

348 Transgenic deletion of HCN1 and/or HCN2 using CRE/loxP technology has provided additional  
349 evidence that HCN1 and HCN2 subunits are the dominant HCN subunits expressed in hippocampal  
350 stratum oriens interneurons (*Matt et al., 2011*). HCN1 and HCN2 subunits likely form heteromers  
351 that exhibit intermediate biophysical properties and cAMP sensitivity (*Ullens and Tytgat, 2001*).  
352 Given the context that HCN1 channel subunits are localized to dendrites of CA1 pyramidal cells  
353 (*Lörincz et al., 2002*), whether similar trafficking principles apply to other cell types motivated our  
354 studies. Matt and colleagues detected HCN2 immunoreactivity on the somata of somatostatin-  
355 positive neurons in the stratum oriens layer. Because somatostatin-immunoreactivity was confined  
356 to the somata, it was not clear whether HCN2 immunoreactivity extended to dendritic regions (*Matt*  
357 *et al., 2011*). Moreover, a previous study demonstrated that HCN4 immunoreactivity is present  
358 in somatodendritic regions of parvalbumin-positive subpopulations in stratum oriens, but it is not  
359 clear whether OLM cells were included in this HCN4-containing subpopulation of stratum oriens  
360 interneurons (*Hughes et al., 2013*). To investigate the subcellular localization of HCN channels,  
361 we employed HCN2 immunocytochemistry in *Chrna2-CRE:tdTomato* mice. Unlike somatostatin,  
362 which labels several hippocampal interneuron subpopulations, the *Chrna2* gene encodes for the  
363  $\alpha 2$  nicotinic acetylcholine receptor, which has an expression pattern that is highly restricted to  
364 hippocampal OLM cells (*Mikulovic et al., 2015; Urban-Ciecko and Barth, 2016*). Using this transgenic  
365 mouse as a tool for visualizing OLM dendrites, we investigated whether HCN2 immunoreactivity  
366 was present in the somata only, or extended to dendritic regions of OLM cells.

367 Although there is 100% HCN2 sequence identity between rat and mouse HCN2, no publication  
368 exists that tests the specificity of the HCN2 antibody in mouse. Therefore, we investigated the  
369 specificity of the HCN2 antibody using Western blot (see *Figure 6-Figure Supplement 1*). Using  
370 protein homogenate isolated from mouse hippocampus, we detected a band at 95 kD, which is the  
371 expected molecular weight for HCN2, confirming specificity of the HCN2 antibody. In accordance  
372 with previous studies (*Mikulovic et al., 2015; Leão et al., 2012*), tdTomato-positive neurons were  
373 observed in the stratum oriens layer of hippocampus (*Figure 6*), consistent with the expected  
374 anatomical localization of OLM cells. HCN2 immunoreactivity was detected to be co-localized to  
375 OLM cells in the stratum oriens, as observed previously (*Matt et al., 2011*). At higher magnification  
376 (*Figure 6D,E,H,I*), we observed HCN2 immunoreactivity on proximal dendrites of OLM cells (as  
377 indicated by arrows). These data were taken from ventral slices of hippocampus, but we also  
378 observed HCN2 immunoreactivity in OLM cell dendrites using dorsal slices, but they were of  
379 lower abundance (compare *Figure 6* with *Figure 6-Figure Supplement 2*). We also obtained HCN1  
380 immunoreactivity in OLM cells from dorsal and ventral hippocampal slices (see *Figure 6-Figure*  
381 *Supplement 3*). In summary, these immunohistochemical observations independently corroborate  
382 our modelling results that HCN-containing channels are present on both somata and dendrites of  
383 OLM cells.

### 384 **Optimized full spiking models of OLM cells recapitulate both depolarizing and hy-** 385 **perpolarizing responses to current step stimuli**

386 We have so far developed three multi-compartment models of OLM cells with fitted passive and  
387  $I_h$  parameter values. H-channels are present in the dendrites of these models as found to be the  
388 most appropriate distribution given the experimental data, and now confirmed with immunohisto-

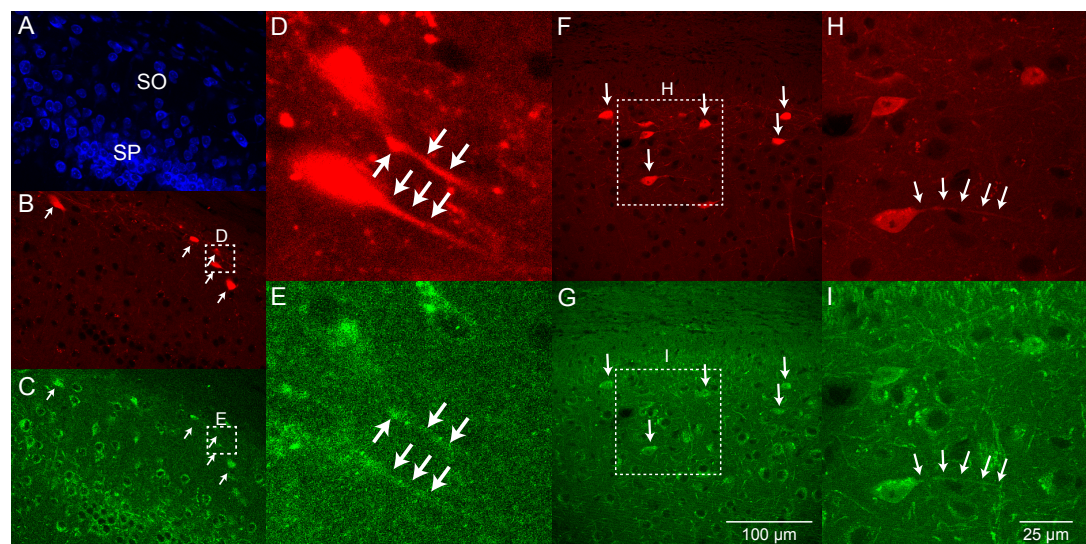

**Figure 6. Evidence for HCN2-containing Channels on Dendrites of OLM Cells.**

**A.** Neurotrace 435, **B.** endogenous tdTomato, and **C.** HCN2 immunofluorescence were imaged in hippocampal slices from *Chrna2-CRE:tdTomato* mice. **D.** Expanded view of two OLM cells illustrating **E.** HCN2 immunofluorescence on OLM cell proximal dendrites. **F., H.** tdTomato images of additional OLM cells with **G., I.** dendritic HCN2 immunofluorescence. Slices obtained from ventral hippocampal CA1. Scale bar in **G.** applies to zoomed out images in **A., B., C., F., G.** Scale bar in **I.** applies to zoomed in images in **D., E., H., I.**

**Figure 6-Figure supplement 1.** Western blots.

**Figure 6-Figure supplement 2.** HCN2 in dorsal hippocampal OLM cells

**Figure 6-Figure supplement 3.** HCN1 immunofluorescence in hippocampal OLM cells

389 chemical studies (**Figure 6**). We now focus on two of the OLM cell models - *Cell 1* and *Cell 2* - and  
390 move forward to include a full repertoire of ion channel types as used in previous OLM cell models  
391 (**Lawrence et al., 2006b**), thus creating full spiking models available for use in further studies.

392 To do this, we optimized the parameter values to depolarizing steps of the particular cell, where  
393 most voltage-gated ion channels were expected to be activated. Details of the approach used  
394 is given in the Methods. In brief, we used BluePyOpt (**Van Geit et al., 2016**) to perform multi-  
395 objective optimizations that provided sets of parameter values which generated appropriate OLM  
396 cell voltage output at +30 pA, +60 pA and +90 pA depolarizing steps (protocol #2 in **Table 5** in the  
397 Methods), and we did our fitting using holding currents in line with the experimental data (4 pA  
398 for *Cell 1* and -5 pA for *Cell 2*). We note that our fits were done using the specific experimental  
399 data sets and not to a set of experimental data with variances associated with electrophysiological  
400 features. The resulting best fits are shown in **Figure 7**, and the next four top fits are shown in  
401 **Figure 7-Figure Supplement 3**. The optimized spiking model features relative to the experimental  
402 data are shown in **Figure 7-Figure Supplement 4A**, and the optimized parameter values are given  
403 in **Figure 7-Figure Supplement 4B,C** and the Methods. Similar outputs were obtained in these top  
404 five ranked optimized models and all performed well in terms of capturing electrophysiological  
405 feature measurements (**Figure 7-Figure Supplement 4A**). *Cell 2* in particular had more difficulty with  
406 the “AHP\_depth efeature”, which is likely because the model failed to attain a high-enough spike  
407 threshold, and thus the resulting “AHP\_depths” were too low. While we tried to encourage the  
408 models to reach higher spike thresholds by allowing the sodium voltage-dependencies to vary as  
409 free parameters in the optimizations (**Figure 7-Figure Supplement 4C**), in the end, the models could  
410 not fully capture the adaptation in spike threshold that was seen experimentally (i.e. the spike  
411 threshold appeared to increase during spiking at higher frequencies). These top models also had  
412 similar optimized parameter values (**Figure 7-Figure Supplement 4B,C**), though this may be a result  
413 of over-constraining the optimizations (see approach and parameter ranges in the Methods).

414 To ensure that the full spiking models did not affect the  $I_h$  fits, we applied hyperpolarizing steps

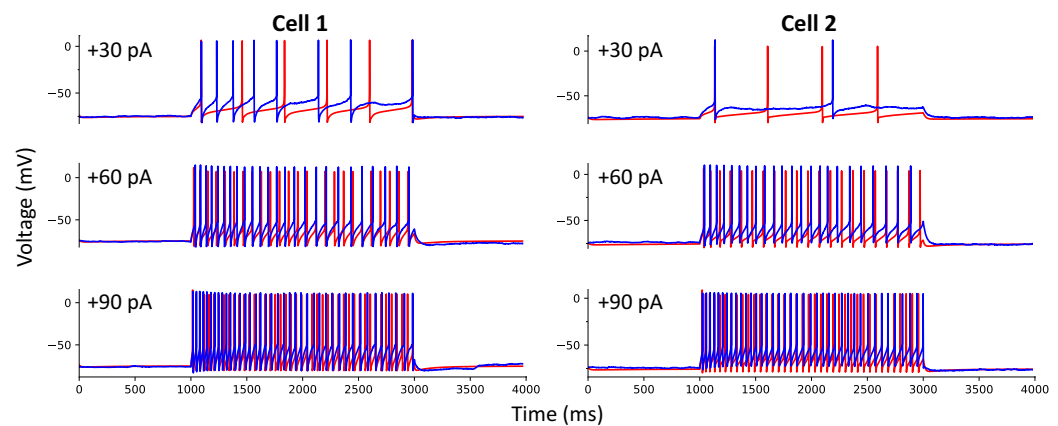

**Figure 7. Full Spiking Optimized OLM Cell Models.**

The most highly ranked optimized models for *Cell 1* and *Cell 2* are plotted in red, and the experimental data is plotted in blue. Model parameters were optimized using depolarizing +30 pA, +60 pA, and +90 pA current step recordings from protocol #2 in [Table 5](#) specific for *Cell 1* and *Cell 2*.

**Figure 7-Figure supplement 1.** Adding spiking currents does not affect the fit to hyperpolarizing steps.

**Figure 7-Figure supplement 2.** Currentscapes for top spiking models.

**Figure 7-Figure supplement 3.** Other top optimized spiking models.

**Figure 7-Figure supplement 4.** Optimized spiking model features and parameters.

415 to the full spiking models as done experimentally, and found that they were in full agreement with  
416 the experimental data, as shown in [Figure 7-Figure Supplement 1](#). It was expected that adding the  
417 full set of ion channel mechanisms would not affect the model's ability to match the hyperpolarizing  
418 steps since the additional currents are not active at these hyperpolarized values. This can be  
419 appreciated by looking at the contributions from the different currents at the different current steps  
420 using "currentscapes", a novel visualization technique ([Alonso and Marder, 2019](#)). In [Figure 7-Figure](#)  
421 [Supplement 2](#), it is clear that only  $I_h$  and the leak current are active during the hyperpolarization  
422 steps, and not other ionic currents. In fact, contributions from all other currents during these  
423 hyperpolarization steps were minimized beyond being able to see them on the plots and outward  
424 current can become non-existent since the reversal potential for potassium is passed.

425 Taking advantage of our generated currentscapes ([Figure 7-Figure Supplement 2](#)), we were able  
426 to easily observe several features in our optimized models. A prominent feature was the large  
427 contributions from A-type potassium currents during both the baseline periods as well as during  
428 spiking regime activities. Since we minimized slow delayed rectifier potassium conductance on  
429 purpose in order to achieve better fits (see Methods and [Figure 7-Figure Supplement 4](#)), it was not  
430 surprising that the major contribution of outward currents during spikes was from fast delayed rec-  
431 tifier potassium. However, it was perhaps surprising that M-type and calcium-activated potassium  
432 currents provided such large contributions to outward currents, despite having considerably smaller  
433 conductances relative to the other outward ion channel types ([Figure 7, Figure Supplement 4](#)). Par-  
434 ticularly, M-type exhibited larger current contributions during the after-hyperpolarization periods  
435 (AHP) at higher spike rates. In terms of inward current contributions, we did not see any observable  
436 contributions from the L-type and T-type calcium channel types. Mostly, inward current contribu-  
437 tions in the spiking regimes were from sodium channels. However,  $I_h$  provided some observable  
438 contributions during the spike recovery periods, and also provided a larger contribution leading up  
439 to the first spike.

440 We note that our goal was to obtain spiking models that could adequately recapitulate the  
441 data for the particular cell, that is, starting idealized "base" models of OLM cells. These base  
442 models should be further explored for degeneracy and can be leveraged for additional insights  
443 and hypothesis generation moving forward (see Discussion). However, they represent the most  
444 comprehensive multi-compartment models of OLM cells to date, having been produced using



445 morphologies and electrophysiological recordings obtained from the same biological OLM cells.

## 446 Discussion

447 In this work, we obtained a set of recordings from OLM cells in hippocampal CA1 that allowed us  
448 to explicitly link morphological, passive and h-channel biophysical parameters within the same  
449 cell. From this set, we constructed three “next generation” experimentally-constrained multi-  
450 compartment models of CA1 OLM cells. The models developed here are considered next generation  
451 in that, unlike all previous computational models of OLM cells (*Skinner and Ferguson, 2018*), we have  
452 here for the first time characterized the h-channels on an individual cell basis, and further, matched  
453 morphology and electrophysiology to constrain two full spiking models of OLM cells. Our models  
454 robustly predicted that h-channels are expressed on the dendrites of OLM cells. Moreover, through  
455 an independent line of experiments, we confirmed this to be the case using immunohistochemical  
456 staining of HCN2-containing subunits. These lines of evidence converge on the conclusion that  
457 h-channel expression extends into the dendrites of OLM cells. Our models can be used in future  
458 studies to explore the synaptic and network consequences of dendritic HCN channel expression in  
459 OLM cells within the context of hippocampal microcircuit function.

## 460 Computational and experimental investigations in OLM cells converge on somato- 461 dendritic HCN channel expression

462 The existence of h-channels, mixed cation channels that activate with hyperpolarization, has long  
463 been known since first discovered as “funny” currents in the heart (*Brown et al., 1979*), and in the  
464 CNS, they contribute to maintenance of the RMP, pacemaking ability, and synaptic integration (*Biel  
465 et al., 2009; Lörincz et al., 2002; Magee, 1998*). The contribution of h-channels in pyramidal cells to  
466 subthreshold resonance and spiking output features in hippocampus and cortex has been much  
467 studied (*Biel et al., 2009; Narayanan and Johnston, 2012; Santoro and Baram, 2003; Zemankovic  
468 et al., 2010*). In particular, it is known that the distribution of HCN1-containing channels increases  
469 from soma to distal dendrite and as such, have been shown to control the temporal summation  
470 of synaptic inputs from dendrites to soma (*Magee, 1998; Vaidya and Johnston, 2013*). However,  
471 h-channels in cerebellar Purkinje neurons are uniformly distributed in their dendrites and do  
472 not strongly affect temporal summation to the soma (*Angelo et al., 2007*). For interneurons, and  
473 OLM cells in particular, it is known that they express HCN channels, as seen by a large sag upon  
474 hyperpolarization (*Maccaferri and McBain, 1996*). However, prior to this work, it has been entirely  
475 unknown whether OLM cells express h-channels on their dendrites.

476 H-channels in OLM cells have been implicated in pacemaking and oscillatory activities of the  
477 hippocampus (*Gloveli et al., 2005; Maccaferri and McBain, 1996*), and theta (4-12 Hz) rhythms in  
478 particular (*Maccaferri and Lacaille, 2003; Rotstein et al., 2005*). Subsequent experimental studies  
479 found that OLM cells did not have any preferred spiking frequency response to broadband artificial  
480 synaptic inputs (*Kispersky et al., 2012*). *Kispersky et al. (2012)* did find, however, that OLM cells  
481 exhibited a phase-locked spiking preference to theta frequency modulated inputs, but this spike re-  
482 sonance did not depend on h-channels. However, these frequency modulated synaptic inputs were  
483 delivered exclusively to the soma of OLM cells via dynamic clamp technology. Using computational  
484 model databases of OLM cells in the absence or presence of h-channels in dendritic compartments,  
485 our previous studies revealed that OLM cells modelled to be in a simplified *in vivo*-like scenario  
486 could exhibit a theta frequency spiking resonance when inputs were delivered to their dendrites  
487 (*Sekulić and Skinner, 2017*). We further found that a high or low theta frequency spike resonance  
488 was possible and is respectively dependent on whether h-channels were present in the dendrites  
489 or not of the OLM cell models, reminiscent of Type 1 and 2 theta rhythms in the behaving animal  
490 (*Kramis et al., 1975*). Our modeling work examining dendritic distributions of h-channels in OLM  
491 cells found that the distributions could vary so long as total conductance was conserved (*Sekulić  
492 et al., 2015*), as was also found in Purkinje cells (*Angelo et al., 2007*). Thus a motivating factor in  
493 the present study was to constrain this extra ‘free parameter’ by obtaining direct measurements of

494 the total conductance in OLM cells. In doing this, we were able to show that our OLM cell models  
495 best matched the experimental data if h-channels are present in the dendrites. Interestingly, while  
496 the total h-channel conductance ranged from 2.2-4.2 nS in the three cells that were fully analyzed  
497 (**Table 4**), the conductance density in each of the three cells is about 0.1 pS/ $\mu\text{m}^2$ , which is the value  
498 found in highly ranked OLM cell models from our previously developed model databases (**Sekulić**  
499 **et al., 2014; Sekulić and Skinner, 2017**). **Zemankovics et al. (2010)** obtained total conductance val-  
500 ues averaging approximately 4 nS, which are near the upper limit of our measurements. However,  
501 total h-channel conductance values were obtained in OLM cells in rat, which had a two-fold larger  
502 measured capacitance (208 pF) than our mouse OLM cells (107 pF). Therefore, given the difference  
503 in measured surface area between rat and mouse, our data is in accordance with this previous  
504 study. Compared to **Maccaferri and McBain (1996)** who obtained a mean reversal potential of -32.9  
505 mV, an activation curve with a half-activation voltage ( $V_{1/2}$ ) of -84.1 mV, and slope factor ( $k$ ) of -10.2  
506 mV, our reversal potentials ranged from -25.2 to -34 mV, with model  $V_{1/2}$  fits of -99.6 to -113.8 mV,  
507 and  $k$  of -9.99 mV (**Table 4**). The voltage-dependence of the time constant yielded fits that were  
508 different but with overlapping values for the three cells (**Figure 3B**).

509 This model prediction was borne out by our immunohistochemistry studies showing HCN2 in the  
510 dendrites of OLM cells. Specifically, we found expression of HCN2 in dendrites of ventral (**Figure 6**)  
511 and dorsal (**Figure 6-Figure Supplement 2**) OLM cells. Although we attempted to obtain evidence of  
512 HCN1 localization, the low signal-to-noise of the antibody staining did not permit an unambiguous  
513 determination of HCN1 channels on OLM cell dendrites of either ventral or dorsal populations  
514 (**Figure 6-Figure Supplement 3**). A previous study found HCN2 expression in somatic regions of  
515 OLM cells, but did not examine dendritic expression (**Matt et al., 2011**). As far as we know, our  
516 study is the first to present immunohistochemical evidence for the expression of h-channels in the  
517 dendrites of a significant population of OLM cells. Moreover, given the evidence that HCN1 subunits  
518 are expressed in OLM cells (**Matt et al., 2011**), dendritic localization of HCN2 subunits, formation  
519 of heterodimers with HCN2 subunits (**Ulens and Tytgat, 2001**), and biophysical properties of OLM  
520 cell h-channels consistent with HCN1/2 expression (**Figure 3**), it is possible that HCN1 subunits are  
521 co-expressed with HCN2 subunits on OLM cell dendrites. As such, there may be common cellular  
522 rules for subcellular trafficking of HCN1/HCN2 subunits in OLM and CA1 pyramidal cells (**Lörincz**  
523 **et al., 2002**).

### 524 **Cellular and synaptic consequences of somatodendritic HCN channels in OLM cells** 525 **on hippocampal microcircuit operations**

526 In building our next generation OLM cell models using morphological and electrophysiological data  
527 from the same cell, we were able to robustly show, and thus predict, the presence of h-channels  
528 in the dendrites of OLM cells. In doing this, it was critically important that the experimental data  
529 came from the same cell. Recently OLM cells were discovered to be comprised of parvalbumin-  
530 and 5HT3 subtypes (**Chittajallu et al., 2013**). With the advent of sophisticated genetic sequencing  
531 techniques (**Cembrowski and Spruston, 2019; Harris et al., 2018**), additional OLM cell subtypes  
532 can be recognized. Whether Chrna2-expressing OLM cells are a distinct OLM subpopulation or  
533 preferentially fall into an existing subclass is not yet known. Moreover, it was noted that CA1  
534 pyramidal cells have a continuous, rather than discrete, variation on the longitudinal axis of the  
535 hippocampus, indicating this as an organizational principle (**Cembrowski et al., 2016**), and structural-  
536 functional correlations are apparent for ventral, intermediate and dorsal regions of the long axis  
537 (**Fanselow and Dong, 2010**). Given this observation, it is interesting to note that *Cell 1* and *Cell 2*  
538 from an intermediate CA1 region have more similar characteristics than *Cell 3* which is from a more  
539 ventral CA1 region (see **Figure 3**).

540 It has been proposed that OLM cells play a gating role (**Leão et al., 2012**), akin to earlier work  
541 by **Blasco-Ibáñez and Freund (1995)** who showed that “horizontal SOM+ interneurons” (i.e., puta-  
542 tive OLM cells) could act as a switch controlling activation of local pyramidal cells via Schaeffer  
543 collaterals or perforant path input from entorhinal cortex. Further work has shown that OLM

544 cells in intermediate regions of CA1 exert a bidirectional control on learning and memory (*Siwani*  
545 *et al., 2018*), and ventral OLM cells control Type 2 theta rhythms and are associated with increased  
546 risk-taking (*Mikulovic et al., 2018*). In a recent modeling study, OLM cells were shown to be critical  
547 in producing a robust intrinsic theta output (*Chatzikalymniou and Skinner, 2018*), which suggests  
548 that their neuromodulation may be key to the maintenance of theta rhythms.

549 OLM cells receive inputs from various sources that include local excitatory and inhibitory CA1  
550 neurons, and medial septal/diagonal band of Broca (MS-DBB) inputs (*Chamberland et al., 2010*;  
551 *Lawrence et al., 2006a*; *Leão et al., 2012*; *Lovett-Barron and Losonczy, 2014*). Excitatory inputs  
552 from MS-DBB glutamatergic neurons have activity that precedes and controls the initiation of  
553 both hippocampal theta activity as well as animal locomotion (*Fuhrmann et al., 2015*). OLM cells  
554 also receive cholinergic inputs from a separate population of MS-DBB cells, whose activation onto  
555 muscarinic receptors promotes excitability and enhances oscillatory activity of OLM cells at theta  
556 frequencies (*Lawrence et al., 2006a,c*). Still further, OLM cells receive GABAergic inputs from a third  
557 population of MS-DBB neurons that express GABA, thought to rhythmically inhibit and thus pace  
558 OLM cells at theta frequencies (*Borhegyi et al., 2004*; *Gulyás et al., 1990*). The interpretation of  
559 rhythmic inhibition by MS-DBB GABAergic cells of OLM cell activity at theta frequencies nevertheless  
560 leading to recruitment of OLM cell theta frequency firing is supported by our modeling work (*Sekulić*  
561 *and Skinner, 2017*) where we showed that modulation of inhibitory synaptic input preferentially  
562 enhances spike recruitment of OLM cell models at theta frequencies. At a behavioural level, recent  
563 work has shown that selective optogenetic silencing of MS-GABAergic neurons to reduce theta did  
564 not affect memory if it occurred outside of REM sleep (*Boyce et al., 2016*). The exact mechanisms  
565 of theta transmission from the MS-DBB to the hippocampus are likely to be complex and depend  
566 on the specific timing of the incoming excitatory and inhibitory pathways. It is possible that  
567 spatial as well as temporal patterning of synaptic inputs onto the dendritic trees of OLM cells are  
568 precisely arranged to be able to recruit OLM cell activity during theta rhythms. Thus, the dendritic  
569 distributions of voltage-gated channels, including but perhaps not limited to HCN1/2 channels,  
570 may be arranged in conjunction with the spatial pattern of synaptic inputs to allow OLM cells  
571 to participate in hippocampal theta activity in a behavioural context-dependent way. The cAMP-  
572 dependent neuromodulation of somatodendritic HCN1/2 channels in OLM cells by synaptically  
573 released norepinephrine onto beta-adrenergic receptors (*Maccafèrri and McBain, 1996*; *Sekulić*  
574 *and Skinner, 2017*) will increase cellular excitability. Combined with increased activation of MS-  
575 DBB GABAergic afferents, this neuromodulation would promote rebound spiking in OLM cells and  
576 facilitate hippocampal encoding and novelty detection operations.

### 577 **Exposing and exploiting limitations in experiments and multi-compartment model** 578 **development, and a 'cycling' strategy**

579 It was initially unexpected that a model with fitted passive properties and morphologies obtained  
580 in conjunction with h-channel parameters extracted from the same cell did not produce voltage  
581 recordings that matched those from experiment when all channel types except h-channels were  
582 blocked (*Figure 4A*). To explain why this may be the case, some general issues in building multi-  
583 compartment models directly from limited experimental data need to be considered.

584 The experimental data obtained from the OLM cells here, used to extract both passive and  
585 h-channel characteristics, were not perfectly optimal. In an attempt to constrain as many distinct  
586 parameters within the same cell as possible, we deliberately sacrificed depth for breadth so that  
587 practical choices were inevitable in the distribution of efforts. There are inherent limitations to cell  
588 stability that require rapid succession through a sequence of experimental protocols (*Table 5*). In our  
589 hands, the limit of stability was approximately thirty minutes. In this time, we were able to obtain  
590 recordings, bath changes, and biocytin fills that allowed us to do reconstructions, and obtain passive  
591 property and h-channel biophysical properties, but having several protocols prevented multiple  
592 sweeps of any given protocol. The I-V relation for determining maximum conductance and reversal  
593 potential was not always linear across all voltage steps, as required from theoretical perspectives

594 in the mathematical model formulations. Furthermore, there was some error associated with  
595 fitting the Boltzmann function describing the steady-state activation curves to all data points  
596 obtained from the h-channel activation protocol. Indeed, due to inherent biological variability and  
597 experimental constraints, some measure of error is expected whenever experimental data is fitted  
598 to theoretical or mathematical models, such as a Boltzmann function for the activation curves, or a  
599 dual exponential function for the time constant of activation. Accordingly, although we obtained  
600 the requisite experimental data for fully characterizing h-channels and fitting to mathematical  
601 models of them, we should not expect that the resulting parameters will necessarily result in fully  
602 appropriate cellular output when initially used. That is, even when inserted into multi-compartment  
603 models built of the same cells from which the h-channel characteristics were obtained, there may  
604 be error in the resulting model's  $V_m$ 's output compared to that of the experimental recordings. In  
605 essence, this is due to the accumulation of errors in estimating the various parameters used, and is  
606 compounded with increasing number of experimentally-constrained parameters in the model.

607 To overcome this, we found that an approach of a staggered re-fitting of the parameters in  
608 the model was able to produce generalizable results so that the  $V_m$  output could match all of the  
609 experimental traces including those for which it was not specifically optimized. This procedure can  
610 be thought of as correcting for errors in the procedures for extracting the parameter values from  
611 the experimental data, using the same principles for correcting for errors in the morphological  
612 reconstructions by fitting the passive properties. Having many recordings from the same cell allowed  
613 us to do a staggered re-fitting of model parameters that avoided overfitting and allowed validation,  
614 as well as consideration of the voltage dependence of h-channel activation time constants. It may  
615 be possible to use more sophisticated optimization schemes to obtain generalized fits, but the  
616 challenge of fitting detailed multi-compartment models with many parameters to experimental  
617 data is recognized, and has led to use of two-stage fitting processes (*Hay et al., 2011; Roth and Bahl,*  
618 **2009**). We note that our staggered re-fitting can be considered as a form of two-stage fitting where  
619 in our situation, we determined how to proceed with the re-fitting stages based on how robust the  
620 experimental recordings were considered to be. A further limitation of the electrophysiological  
621 data was that our recordings were somatic. Due to the relatively compact nature of OLM cell  
622 dendrites, this is not a major limitation unlike what it may be for pyramidal cells which have  
623 extended dendritic trees. However, in the end, we obtained a strong prediction of h-channels being  
624 present in the dendrites since all three individual model fits supported this interpretation, indicating  
625 the robustness of our staggered re-fitting procedure.

626 We obtained specific capacitance values that were lower than the 'typical' values of  $1.0 \mu\text{F}/\text{cm}^2$   
627 (*Gentet et al., 2000*). This intriguing result requires experimental validation in the form of nucleated  
628 patch recordings as done previously for directly measuring the specific capacitance in other neurons  
629 (*Eyal et al., 2016; Gentet et al., 2000*). It is unlikely that our low specific capacitance values are due  
630 to surface area estimation errors, as even if we had overestimated our surface areas by double,  
631 specific capacitance values would still be  $\approx 0.5 \mu\text{F}/\text{cm}^2$  (see **Table 2**). It is interesting to note that in  
632 the case of human neurons where values of  $\approx 0.5 \mu\text{F}/\text{cm}^2$  were reported (*Eyal et al., 2016*), another  
633 group has reported values of  $\approx 0.9 \mu\text{F}/\text{cm}^2$  (*Beaulieu-Laroche et al., 2018*).

634 Clearly, it is important to keep in mind what one's goal(s) are in the building of a multi-  
635 compartment model in the first place. Without making some simplifying assumptions, such as  
636 uniform passive properties, and having constraining experimental data, we are necessarily faced  
637 with the curse of dimensionality (*Almog and Korngreen, 2016*). In our original multi-compartment  
638 models of OLM cells (*Saraga et al., 2003*), we were motivated to include dendrites because of  
639 clear evidence of highly active dendrites (*Martina et al., 2000*) in OLM cells. Moving forward, we  
640 expanded the extent of ion channels present in the models when recordings specific to M-channels  
641 in OLM cells were performed (*Lawrence et al., 2006b*). A key notion in experimentally-constrained  
642 computational modelling is that the models are never complete. There should always be a re-  
643 reciprocal transfer of knowledge between model and experiment where experimental data is used  
644 to constrain models which, in turn, both point out gaps in our understanding of the underlying

645 cellular neurophysiology as well as generate hypotheses, refine protocols, and consider additional  
646 measurable parameters that can then be incorporated into future model revisions.

647 A particular conceptualization of the role of computational modelling in neuroscience is to  
648 help resolve, or at least reframe, these basic concerns of how “realistic” detailed models can be.  
649 Rather than the idea of obtaining a detailed model as a crystallized end point of any given study,  
650 we consider the role of the detailed modelling as an integral component of a cyclical process  
651 of knowledge generation in neuroscience. We have expressed this as the experiment-modelling  
652 cycling approach (*Sekulić and Skinner, 2018*). Although the approach was initially formulated in  
653 the context of population or database modelling, it can be generalized for any computational  
654 model whose goal is to explain experimental data, develop hypotheses and make predictions.  
655 This conceptualization states from the outset that the goal of modelling is not to find optimal or  
656 realistic models per se, but rather to develop models in such a way that a specific physiological  
657 question is raised and can lead to experimental examinations. In our initial studies, we asked  
658 the question of whether OLM cells expressed h-channels in their dendrites and thus built OLM  
659 cell model databases that either did or did not have h-channels in their dendrites (*Sekulić et al.,*  
660 *2014*). The most relevant aspect of this approach in terms of answering the question of whether  
661 models are realistic or not is the recognition that the process is cyclical. Thus, we consider that an  
662 essential goal in multi-compartment modeling is the back-and-forth cycling between experiments  
663 and models that leads to continual refinement of the model relative to the biological cell, thus  
664 allowing for the generation of predictions for further experiments, and thus knowledge generation  
665 in neuroscience.

#### 666 **Limitations and future work**

667 Although doing more than three full reconstructions, analysis and multi-compartment model  
668 building may be desirable, we felt that consistently obtaining best matches with dendritic h-channels  
669 in all three of our models when fit with data from the same cell was enough to allow for conclusions  
670 as to dendritic expression of h-channels in OLM cells. Also, we focused on uniform h-channel  
671 distribution in the dendrites since our starting models using either no h-channels or h-channels  
672 fully and uniformly distributed in the dendrites did not match the experimental data (*Figure 4A*).  
673 Considering distributions that were not uniformly distributed (e.g., distributed only in proximal  
674 dendrites) would be unlikely to capture the data given that the total h-channel conductance would  
675 remain the same.

676 Our development of full spiking OLM cell models here, as based on *Cell 1* and *Cell 2*, are available  
677 for future use and provided online (see Methods). In particular, it would be interesting to use  
678 currentscape visualization analyses (*Alonso and Marder, 2019*) to help disentangle the interacting  
679 dynamics, perhaps using it to direct how one might best reduce the model complexity to allow  
680 dynamical system analyses to be applied, as well as applying sensitivity analysis techniques such  
681 as uncertainty (*Tennøe et al., 2018*). In turn, this could help decipher how OLM cells preferentially  
682 respond to different theta frequencies based on their biophysical profile as shown in our previous  
683 computational models (*Sekulić and Skinner, 2017*). Further, these models now provide a foundation  
684 or canonical start for the creation of new databases designed to address specific biophysical  
685 questions as done in our original database that was developed to ask whether h-channels were  
686 present in the dendrites (*Sekulić et al., 2014*). Interestingly, co-regulation of h-channels and A-type  
687 channels are apparent in the currentscapes (see *Figure 7-Figure Supplement 2*) as was observed in  
688 our original OLM cell databases.

689 We have previously shown that using virtual networks, or creating *in vivo*-like representations  
690 with multi-compartment cellular models, as done with our earlier OLM cell models (*Sekulić and*  
691 *Skinner, 2017*), can lead to insights of circuit function from cellular specifics. We have also created *in*  
692 *vivo*-like states with interneuron-specific interneuron models (*Guet-McCreight and Skinner, 2019*),  
693 and used them to make links between *in vitro* and *in vivo* studies (*Luo et al., 2018*). In essence, it  
694 seems possible that an understanding of the contribution of biophysical cellular details to circuits

695 in the behaving animal can emerge by using virtual networks.

696 In a review, *Almog and Korngreen (2016)* demonstrate the limitations associated with the re-  
697 usability of layer 5 pyramidal cell models, and also state that there is a need for proving that multi-  
698 compartment models are valid within the context of network simulations. These are challenging  
699 issues to consider but an important step that they suggest is to ensure that models are linked  
700 with the experimental data. Along these lines, neuroinformatic tool developments (e.g., Nexus -  
701 <https://bluebrainnexus.io>) can help reduce the workload.

702 In conclusion, we have achieved our goal and our work has shown that if the development of  
703 multi-compartment models are done for a specific cell type in which ion channel characterization  
704 and morphological and passive data can be obtained from the same cell for several cells, it is  
705 possible to determine their ion channel distribution and biophysical characterization.

## 706 **Methods and Materials**

### 707 **Ethics statement**

708 All procedures were performed in accordance with the University of Montana (Animal Use Protocols  
709 026-11 and 017-14) and Texas Tech University Health Sciences Center (Animal Use Protocols 15025,  
710 15031 and 16037) Institutional Animal Care and Use Committees.

### 711 **Brain slice preparation**

712 Transverse hippocampal slices were prepared as described previously *Yi et al. (2014)*. Briefly, SOM-  
713 CRE<sup>+/+</sup>:Rosa26YFP<sup>+/+</sup> (SOM-YFP) mice of both genders (9-10 weeks) were anesthetized with isoflurane  
714 and then transcardially perfused with ice-cold partial sucrose solution (PSS) containing (mM): 80  
715 NaCl, 2.5 KCl, 24 NaHCO<sub>3</sub>, 0.5 CaCl<sub>2</sub>, 4 MgCl<sub>2</sub>, 1.25 NaH<sub>2</sub>PO<sub>4</sub>, 25 glucose, 75 sucrose, 1 ascorbic  
716 acid, 3 sodium pyruvate, saturated with 95% O<sub>2</sub>/5% CO<sub>2</sub>, pH 7.4 *Bischofberger et al. (2006)*. After  
717 carefully extracting, blocking, and mounting the brain, transverse hippocampal slices (300 μm)  
718 were cut in ice-cold oxygenated PSS with a 1200 S Vibratome (with Vibrocheck accessory; Leica  
719 Microsystems, Bannockburn, IL, USA), and then were incubated in warm (36°C) oxygenated PSS at  
720 least 30 min before use.

### 721 **Chemical reagents**

722 DL-APV was purchased from R&D Systems (Minneapolis, MN, USA). Tetrodotoxin (cat# 5651), TEA  
723 (cat# 2265), 4-AP (cat# A78403), DNQX (cat# D0540), SR-95531 (cat# S106), and ZD7288 hydrate  
724 (cat# Z3777) were purchased from Sigma-Aldrich, Inc. (Saint Louis, MO, USA). Salts and chemicals  
725 for saline solutions, including biocytin, were also purchased from Sigma-Aldrich, Inc.

### 726 **Western Blot methods**

727 Mouse hippocampi and the whole brains (without hippocampi) were collected separately, sonicated  
728 and lysed in Radioprecipitation Assay Lysis buffer (5M NaCl, 0.5M EDTA pH 8.0, 1M Tris pH 8.0, 1% NP-  
729 40, 10% sodium deoxycholate, 10% SDS). Halt™ Protease inhibitor cocktail 100x (ThermoFisher, cat#  
730 87786) was added before use. The denatured samples were resolved on a 4-20% Mini-PROTEAN TGX  
731 Stain-Free precast protein gel (Bio-Rad, cat# 4568094) and transferred to a nitrocellulose membrane  
732 (0.45 μm, Bio-Rad, cat# 1620115). The membrane was then blocked in 6% milk (diluted in TBS) for 45  
733 min at room temperature, incubated with primary antibody (1:200, rabbit anti-HCN2, Alomone, cat#  
734 APC-030) in 2% milk overnight at 4°C, followed by goat-anti-rabbit secondary antibody (1:10,000,  
735 IRDye 800CW, LI-COR) in 2% milk for 1 hour at room temperature. TBST was used for all the washes  
736 after antibody incubation (5 x 5 minutes). The near infrared immunoreactivity bands were imaged  
737 using Odyssey CLx Imaging System (LI-COR) and converted to grayscale with Photoshop.

### 738 **Electrophysiological recordings and analyses**

739 Hippocampal slices were transferred to a recording chamber and submerged in artificial cere-  
740 brospinal fluid (ACSF) solution containing (mM): 125 NaCl, 2.5 KCl, 25 NaHCO<sub>3</sub>, 2 CaCl<sub>2</sub>, 1 MgCl<sub>2</sub>, 1.25  
741 NaH<sub>2</sub>PO<sub>4</sub> and 20 glucose, saturated with 95% O<sub>2</sub>/5% CO<sub>2</sub>, pH7.4, at 34–35°C. SOM-YFP cells in the  
742 CA1 stratum oriens layer of hippocampus were visualized using IR-Dodt contrast and fluorescence

743 video-microscopy (Zeiss Axiovision 4.7) on either a Patch Pro 2000 (Scientifica Ltd, Uckfield, East  
744 Sussex, UK) or Infrapatch (Luigs and Neumann, Ratingen, Germany) on an upright Zeiss microscope  
745 (Axio Examiner; Carl Zeiss Microscopy, LLC, Thornwood, NY, USA). On the Patch Pro 2000, live YFP-  
746 positive cells were visualized with a 505 nm LED (LED4C11-SP; Thorlabs) driven by a four-channel  
747 LED driver (DC4100; Thorlabs). On the Infrapatch rig, a 505 nm LED was controlled by the Colibri  
748 LED illumination system (Carl Zeiss Microscopy). Patch pipettes (2-4 M $\Omega$ ) were fabricated using a  
749 two-step vertical electrode puller (PC-10; Narishige, East Meadow, NY, USA) and filled with internal  
750 solution containing (mM): 110 potassium gluconate, 40 KCl, 10 HEPES, 0.1 EGTA, 4 MgATP, 0.3  
751 Na<sub>2</sub>GTP, 10 phosphocreatine and biocytin 0.2%, titrated to pH 7.2 with KOH, osmolarity 295-305  
752 mOsm/L. Whole cell recordings were made using a Multiclamp 700B amplifier (Molecular Devices,  
753 Union City, CA, USA), filtered at 4 kHz, and digitized at 20 kHz (Digidata 1440A; Molecular Devices).  
754 Current and voltage traces were acquired on a PC running Axograph X (Axograph Scientific, Sydney,  
755 Australia). Solutions were heated to 34-35°C with an inline solution heater (HPT-2, Scientifica;  
756 SH-27B/TC-324B, Warner, Hamden, CT, USA). Access resistance ( $R_s$ ) was monitored during recording.  
757 Cells with initial  $R_s$  less than 20 M $\Omega$  were recorded. If  $R_s$  changed more than 20% during the course  
758 of the whole cell recording, the data were excluded from further analyses. In all recordings, the  
759 AMPA receptor antagonist DNQX (25  $\mu$ M), the NMDA receptor antagonist DL-APV ( $\mu$ M), and the  
760 GABA<sub>A</sub> receptor antagonist SR-95531 (gabazine; 5  $\mu$ M) were included in the ACSF. For blocking  
761 intrinsic voltage-gated channels to obtain  $I_h$ , TEA (10 mM), 4-AP (5 mM), and TTX (1  $\mu$ M) were applied.  
762 The  $I_h$ -specific blocker ZD7288 (10  $\mu$ M) was used to obtain the  $I_h$ -sensitive current and to constrain  
763  $I_h$  parameters on a per-cell basis.

764 The order of protocols is important to consider during the subsequent procedures of obtaining OLM  
765 cell passive properties in light of varying stages of cell health and deterioration as the recordings  
766 progressed. The chronological order of current clamp and voltage clamp experimental protocols  
767 performed are shown in **Table 5**. The approximate length of experiment for a given cell patched  
768 was at most 30 min. At the end of the recording, pipettes were withdrawn to outside-out patch  
769 configuration. Slices were kept on the rig for several minutes to facilitate diffusion of biocytin  
770 to distant subcellular compartments. Electrophysiological data were analyzed with Axograph X.  
771 The junction potential was calculated to be 11.88 mV and was subtracted from all experimentally  
772 recorded voltage values prior to use in subsequent data analysis and creation of multi-compartment  
773 computational models.

### 774 **Visualization of biocytin-filled cells and confocal imaging**

775 During electrophysiological experiments, recorded SOM-YFP cells were filled with biocytin for post  
776 hoc morphological reconstruction. After recording, slices were fixed overnight at 4°C in 0.1 M  
777 phosphate-buffered saline (PBS) containing 4% paraformaldehyde. After several washes in PBS,  
778 and 2 hours permeabilization with 0.3% Triton X-100 in PBS at room temperature, slices were  
779 incubated overnight at 16°C in PBS with Alexa 633-conjugated streptavidin (final concentration 1  
780  $\mu$ g/mL, catalogue no. S-21375; Invitrogen). Slices were cryopreserved in 30% sucrose containing PBS  
781 and then re-sectioned at 100-150  $\mu$ m thickness using a sliding freezing microtome (HM430; Thermo  
782 Scientific, Waltham, MA, USA). After staining with Neurotrace 435/455 (1:100 in PBS) and mounting  
783 on gelatin-coated slides in Vectashield (catalogue no. H-1400; Vector Laboratories), sections were  
784 imaged with a Fluoview FV-1000 confocal imaging system (Olympus) with a 60 $\times$  objective. Confocal  
785 stacks (800  $\times$  800 pixels; 0.2  $\mu$ m z-step) of SOM-YFP cells were flat projected, rotated and cropped in  
786 PhotoShop 13.0 or ImageJ for display.

### 787 **Morphological reconstruction of OLM cells**

788 ImageJ was used as a general purpose image processor including greyscale conversion and bleach  
789 correction (*Schneider et al., 2012*). XuvTools was used for stitching of confocal images (*Emmen-  
790 lauer et al., 2009*). Bitplane Imaris was used for viewing reconstructions in 3D and for validating  
791 the z-stack. Finally, volume reconstruction and specification of geometric models of neuronal  
792 morphologies was performed using Neuromantic (*Myatt et al., 2012*). Confocal microscope images

**Table 5.** Order of experimental protocols performed on OLM cells.

| <b>Order</b> | <b>Description of procedure</b>                                                                                                                                                                                                                                                                                                                                                                                         |
|--------------|-------------------------------------------------------------------------------------------------------------------------------------------------------------------------------------------------------------------------------------------------------------------------------------------------------------------------------------------------------------------------------------------------------------------------|
| #1           | Voltage clamp seal test.                                                                                                                                                                                                                                                                                                                                                                                                |
| #2           | Wash-in of synaptic blockers (DNQX/APV/Gabazine).<br>Current clamp 2s-long steps from -120pA to +90pA in 30pA steps.                                                                                                                                                                                                                                                                                                    |
| #3           | Voltage clamp protocol for activating $I_h$ : Holding potential at -40mV, with a 1.2s-long step at progressively hyperpolarized potentials to -120mV, in -10mV increments.                                                                                                                                                                                                                                              |
| #4           | Wash-in of TEA, 4-AP and TTX, then current clamp protocol as in step #2.                                                                                                                                                                                                                                                                                                                                                |
| #5           | Same protocol for $I_h$ activation as step #3, but now in the presence of TTX/4-AP/TEA.                                                                                                                                                                                                                                                                                                                                 |
| #6           | $I_h$ reversal potential protocol in voltage clamp mode: Holding potential at -40mV, followed by a prepulse to -120mV for 1.2sec to fully activate h-channels. Then, a depolarized relaxation step at -110mV was performed for 1s before returning to the holding potential.<br>Repeated multiple times, with the relaxation steps becoming successively more depolarized at 10mV intervals across each repeated sweep. |
| #7           | Wash-in of ZD7288, then current clamp protocol performed as in step #2.                                                                                                                                                                                                                                                                                                                                                 |
| #8           | Same protocol for $I_h$ activation as steps #3 and #5, but now also in the presence of the h-channel blocker ZD7288.                                                                                                                                                                                                                                                                                                    |

The "order" column displays the sequential order in which the protocols were performed, with a description of each procedure provided in the following column.

793 at 60X magnification were acquired for the cells used in this work. The field of view of each image  
794 was restricted to 200x200  $\mu\text{m}$ , resulting in 2-11 image "stacks" per cell. The microscope step size  
795 was 0.2  $\mu\text{m}$  in the Z-plane, resulting in 150-200 images per stack. Variation in contrast between  
796 stacks were likely due to photobleaching, as stacks acquired later in the image acquisition process  
797 for each cell were more apparently bleached than the ones acquired earlier. Bleach correction  
798 was performed using ImageJ by normalizing the contrast of all stacks for each cell according to  
799 the average intensity value across all stacks per cell. Stacks were then stitched together to recover  
800 the volume information for the entire cell. Stitching was performed using the XuvTools software  
801 package (Emmenlauer et al., 2009). The algorithm implemented in XuvTools utilizes an approach  
802 that calculates the correlation between transformations of successive pairs of 3D images while  
803 performing a translation or displacement operation of each image. The transformations consist  
804 of phase information extracted from discrete Fourier transforms of the images. When displaced  
805 images are compared using the phase information from the Fourier transform – referred to as  
806 the phase-only correlation (POC) – there is a precise peak in the POC function that corresponds  
807 to the estimate of the magnitude of displacement and can thus serve as a marker for how much  
808 displacement is needed to allow for maximum overlap between the images (Emmenlauer et al.,  
809 2009; Ito et al., 2006). An efficient implementation in XuvTools takes advantage of the finding that  
810 even when downscaling the quality of the image when performing comparisons in order to save  
811 on computational runtime, the resulting POC still exhibits a clearly defined peak at the location  
812 of displacement with no local maxima close to the peak (Emmenlauer et al., 2009). Accordingly,  
813 the algorithm is supposed to be robust to noise and is invariant to linear changes in gray values.  
814 In terms of practical application, however, we found that the success of the XuvTools algorithm  
815 varied depending on whether bleach correction was performed or not. In the case of several cells,  
816 the confocal stacks could not be stitched prior to bleach correction. A possible explanation for  
817 this is that the bleaching may not result in a strictly linear shift in contrast but rather skews the  
818 histogram of intensity values towards brighter values. Thus, XuvTools would not be expected to find  
819 a well defined peak in the POC function between the images because the two images are then not



820 simply shifted versions of one another but in fact decorrelated with respect to the phase of image  
821 intensity extracted by the Fourier transform. This would result in an attenuated peak in the POC  
822 function, leading to less certainty in how much displacement is needed to find the optimal overlap  
823 between image pairs. We next performed volumetric reconstruction of the soma, dendrites, and  
824 axons. This was done using the freely-available Neuromantic software package that implements  
825 semi-automated tracing (Myatt *et al.*, 2012). The semi-automated tracing procedure resulted in  
826 successful tracing of several cells in the experimental dataset used here, but with a fundamental  
827 limitation being that 1  $\mu\text{m}$  was the minimum possible diameter hard-coded in Neuromantic. The  
828 resulting surface areas of the traced cells were too large, and distal dendritic diameters were clearly  
829 overestimated. Inhibitory interneurons may possess dendrites with thickness less than a micron,  
830 e.g., 0.4  $\mu\text{m}$  in cerebellar interneurons (Abrahamsson *et al.*, 2012). Accordingly, we performed full  
831 manual reconstructions using Neuromantic.

### 832 **Immunohistochemistry and confocal imaging**

833 Heterozygous *Chrna2-CRE<sup>+/+</sup>:td-Tomato<sup>+/+</sup>* mice (Mikulovic *et al.*, 2015; Leño *et al.*, 2012) were tran-  
834 scardially perfused with fresh 4% paraformaldehyde (PFA) in 0.1 M phosphate-buffered saline  
835 (PBS). The brains were post-fixed with the same fixative overnight and stored in 30% sucrose in  
836 PBS at 4°C for at least 48 hours or until fully submerged in 30% sucrose. Brains were then frozen  
837 with Fisher Healthcare™ Tissue-Plus™ O.C.T Compound 4585 (Fisher Scientific, cat# 23-730-571)  
838 using dry ice in 100% ethanol, and sectioned coronally at 45  $\mu\text{m}$  thickness using a HM430 sliding  
839 microtome (ThermoFisher). Free floating brain slices containing hippocampus were washed with  
840 PBS (3 x 10 min) and permeabilized with 0.3% Triton™ X-100 (Sigma-Aldrich, cat # X100) in PBS.  
841 Blocking was performed using a 30%/70% ratio of antibody diluent solution (ADS; 1% bovine serum  
842 albumin and 0.3% Triton™ X-100 in PBS) to 10% goat serum, respectively, for 2 hours at room  
843 temperature. Sections were then washed in PBS (3 x 10 min) and incubated with rabbit anti-HCN2  
844 primary antibody (0.8 mg/ml in ADS, Alomone Labs, cat# APC-030) overnight at 4°C using an or-  
845 bital shaker (Multi-Purpose Rotator, ThermoScientific). The following day, sections were washed  
846 in PBS (3 x 10 min) and incubated in goat anti-rabbit AlexaFluor 488 secondary antibody (1:500,  
847 ThermoFisher, cat# A-11008) for 2 hours in PBS on an orbital shaker. Finally, following PBS washes  
848 (3 x 10 min), sections were counterstained with Neurotrace 435/455 Blue Fluorescent Nissl Stain  
849 (1:100, ThermoFisher, cat# N21479) for 30 minutes at room temperature in a light-protected box (Yi  
850 *et al.*, 2014). Following PBS washes (3 x 10 min), sections were then mounted with VECTASHIELD®  
851 Hardset™ Antifade Mounting Medium (Vector Laboratories, cat# H-1400), dried overnight, and  
852 sealed with clear nail polish. Confocal images were acquired using a T1-E microscope with A1  
853 confocal (Nikon Instruments) at 10x, 40x, and 100x magnification.

### 854 **Criteria for selection of OLM cells**

855 Patch clamp recordings were performed on a total of 45 cells from the stratum oriens of YFP-  
856 positive cells from heterozygous *Chrna2-CRE<sup>+/+</sup>:td-Tomato<sup>+/+</sup>* mice. After histological processing  
857 was complete, neurons were classified as OLM cells if they possessed a horizontally-oriented  
858 cell body and dendrites within the oriens layer and a major axon projecting perpendicularly with  
859 ramifications in the lacunosum/moleculare layer. Additional criteria were developed for stability of  
860 access and input resistance, completeness of electrophysiological protocols, and signal-to-noise  
861 level in both current and voltage clamp recordings. Only those cells that exhibited <20% change in  
862 input resistance over the course of the experiment were considered for further modelling. The full  
863 suite of electrophysiological protocols, including wash-in of ZD7288 blocker to be able to determine  
864  $I_h$  currents, was required to fulfill selection criteria. Of the 45 cells recorded from in total, 11 OLM  
865 cells met electrophysiological criteria for stability, completeness, and noise level. An analysis of  
866 these 11 cells is given in **Table 1** in which the experimental data analysis was performed as in (Yi  
867 *et al.*, 2014)).

868 Of these 11 OLM cells, three (**Cell 1**, **Cell 2**, **Cell 3**) were advanced for subsequent detailed exper-  
869 imental analyses and multi-compartment computational model development. Over the course

870 of the recordings, the input resistances as determined from seal test recordings changed from:  
871 260.5 to 216.9  $M\Omega$  (-16.7%) for *Cell 1*; 147.3 to 175.1  $M\Omega$  (+15.8%) for *Cell 2*; and 458.7 to 390.6  
872  $M\Omega$  (-8.7%) for *Cell 3*. The sources of these modest changes in input resistance are not clear, but  
873 mechanical drift, activity-dependence (execution of many protocols), and intracellular dialysis are  
874 suspected to be contributing factors.

### 875 **Fitting passive properties in multi-compartment models**

876 Simulations of multi-compartment models of neurons were performed using the NEURON sim-  
877 ulation environment (*Hines and Carnevale, 2001*). We selected long current clamp steps for the  
878 fitting of passive membrane properties rather than shorter voltage clamp “seal test” protocols  
879 due to the incomplete clamping of the membrane by short voltage clamp steps (*Holmes, 2010*).  
880 Furthermore, these voltage traces minimize the contribution of active conductances. Recordings  
881 were performed with synaptic- and voltage-gated channels blocked, and was initially preferable  
882 for passive membrane property fitting in the models. Recordings obtained in the presence of  
883 h-channel blocker ZD7288 are referred to as “ZD traces” and are given by #7 in *Table 5*. Due to the  
884 possibility of changes in membrane responses as a function of the length of the recording session,  
885 we compared the membrane time constants ( $\tau_m$ ) during the charging portion of the current clamp  
886 step for the voltage traces obtained across recordings with synaptic- and voltage-gated blockers  
887 applied. We found that the -30pA ZD traces, being the last traces recorded in the session, showed  
888 noisier membrane responses compared to the -120pA ZD traces obtained earlier. This manifested  
889 as an “undershoot” of the -30pA ZD traces after normalization of the traces was done, so that the  
890 -30pA ZD traces showed a marked slowing of  $\tau_m$  compared to both the -120pA ZD as well as -30pA  
891 “TTX traces” (i.e., #4 in *Table 5*, referred to as such due to TTX application, in addition to potassium  
892 and synaptic blockers), the latter two being largely overlapping (*Figure 2-Figure Supplement 1A*).  
893 The noisier charging portion of the -30pA ZD traces could be seen more clearly if the time point  
894 of normalization of the traces occurred later, at 1000ms after the onset of the hyperpolarization  
895 current clamp step (*Figure 2-Figure Supplement 1A,b*). This demonstrated that in the case of the  
896 -30pA TTX current injection, few or no h-channels were activated as the  $V_m$  response was nearly  
897 identical to that of the ZD traces. This could be further confirmed quantitatively by fitting single  
898 exponential equations to the  $V_m$  responses from the time point of the onset of the hyperpolariza-  
899 tion current clamp step (1000ms) to the point at which the steady-state of the  $V_m$  response was  
900 approximately achieved (*Figure 2*). For all cells,  $\tau_m$  for the -30pA TTX trace was most closely matched  
901 by the -120pA ZD trace (dashed red line), with the subsequent ZD traces (-90pA, -60pA, and -30pA)  
902 exhibiting an increased, and hence slower, membrane response (*Figure 2*, bottom panels). The  
903 fact that the -120pA ZD trace exhibited a similar response as a current injection of one quarter  
904 magnitude and without h-channels being blocked indicated that in both cases, the response of the  
905 membrane was mostly passive.

906 Thus, given the lower signal-to-noise of the -30pA ZD traces, we considered that the passive  
907 properties obtained using the -120pA ZD traces would be better representations of the electrotonic  
908 features of the experimental cells. We thus fitted the passive membrane properties of multi-  
909 compartment models using a virtual current clamp and the Multiple Run Fitter (MRF) of the NEURON  
910 simulation environment (*Hines and Carnevale, 2001*). The -120pA ZD traces for each cell were used  
911 as the experimental recording for which the models’  $V_m$  trajectories needed to match in response to  
912 -120pA virtual current. To confirm that the -120pA ZD traces led to better fits of the cells’ passive  
913 properties, we compared the fits obtained using -120pA and -30pA ZD traces. The resulting fitted  
914 passive parameters of axial resistivity ( $R_a$ ), specific capacitance ( $C_m$ ), leak conductance ( $G_{pas}$ ) and leak  
915 reversal potential ( $E_{pas}$ ) are displayed in *Table 6*. For each cell, the cumulative root-mean-square  
916 error (RMSE) across all traces used for each fit was lower when the -120pA ZD trace was used for  
917 fitting the passive properties (*Table 6*, left column for each cell).

918 During use of the MRF in NEURON for the passive property fitting procedure, certain regions of the  
919 traces were discounted from fitting, such as the first 500ms portion so that initial model transients

**Table 6.** Fitted passive parameters and resulting goodness of fit of models to various current clamp step traces.

|                                      | <b>Cell 1</b>         | <b>Cell 1</b>         | <b>Cell 2</b>         | <b>Cell 2</b>         | <b>Cell 3</b>         | <b>Cell 3</b>         |
|--------------------------------------|-----------------------|-----------------------|-----------------------|-----------------------|-----------------------|-----------------------|
| <i>"ZD trace"</i>                    |                       |                       |                       |                       |                       |                       |
| used for fitting                     | -120 pA               | -30 pA                | -120 pA               | -30 pA                | -120 pA               | -30 pA                |
| $R_a$ ( $\Omega\text{cm}$ )          | 141.85                | 258.21                | 285.78                | 474.78                | 94.83                 | 329.99                |
| $C_m$ ( $\mu\text{F}/\text{cm}^2$ )  | 0.2698                | 0.2552                | 0.2799                | 0.4721                | 0.3057                | 0.4744                |
| $G_{pas}$ ( $\text{S}/\text{cm}^2$ ) | $7.93 \times 10^{-6}$ | $9.62 \times 10^{-6}$ | $9.24 \times 10^{-6}$ | $9.39 \times 10^{-6}$ | $7.48 \times 10^{-6}$ | $7.27 \times 10^{-6}$ |
| $E_{pas}$ (mV)                       | -49.0                 | -48.3                 | -54.7                 | -56.6                 | -69.1                 | -68.1                 |
| RMSE (-30 pA ZD)                     | 0.5058                | 0.3289                | 0.6594                | 0.1893                | 1.079                 | 0.0456                |
| RMSE (-60 pA ZD)                     | 7.458                 | 5.742                 | 0.9828                | 0.7092                | 2.410                 | 1.398                 |
| RMSE (-90 pA ZD)                     | 1.945                 | 3.393                 | 0.6155                | 3.829                 | 2.194                 | 16.89                 |
| RMSE (-120 pA ZD)                    | 0.3602                | 3.440                 | 0.9818                | 9.875                 | 0.5199                | 50.38                 |
| RMSE (-30 pA TTX)                    | 0.6596                | 0.2048                | 0.3108                | 0.6234                | 1.679                 | 9.021                 |
| Cumul. RMSE (mV)                     | 10.92                 | 13.10                 | 3.550                 | 15.22                 | 7.881                 | 77.73                 |

920 did not affect the fitting. Furthermore, because the charging portion of  $V_m$  was very short – on the  
 921 order of 100ms – it was given a greater weight value (10X) compared to the rest of the trace, in the  
 922 MRF. Only the initial portion of the steady-state response after the hyperpolarizing current clamp  
 923 step was used for fitting. This was because for some cells, a small depolarization was present even  
 924 under ZD7288 block, which could have been due to noise or the presence of another, unidentified  
 925 inward current that was not blocked.

### 926 **Passive membrane model and experiment comparisons**

927 Input resistance ( $R_{in}$ ) in the passive models computed using a current clamp protocol of -120 pA,  
 928 i.e., the same protocol used to fit the passive properties, is given by values of  $V_m$  taken at the start  
 929 and end of the current clamp step:  $R_{in} = (V_{start} - V_{end}) / (-120 \text{ pA})$ . Using experimental -120pA ZD traces,  
 930 the input resistance is also computed. These input resistance values are shown in **Table 7**.

**Table 7.** Computed surface areas, model discretizations, input resistances and time constants.

| <b>Parameter</b>                                 | <b>Cell 1</b> | <b>Cell 2</b> | <b>Cell 3</b> |
|--------------------------------------------------|---------------|---------------|---------------|
| Soma surface area ( $\mu\text{m}^2$ )            | 7,651         | 13,035        | 6,911         |
| Somatodendritic surface area ( $\mu\text{m}^2$ ) | 29,378        | 35,159        | 21,990        |
| Number of compartments (model with $I_h$ )       | 303           | 632           | 837           |
| $R_{in}$ (M $\Omega$ ) (passive model)           | 411           | 332           | 550           |
| $R_{in}$ (M $\Omega$ ) (expt with ZD7288)        | 363           | 326           | 531           |
| $\tau_m$ (ms) (passive model)                    | 30.4          | 27.4          | 36.4          |
| $\tau_m$ (ms) (using -30pA TTX trace)            | 32.8          | 29.1          | 40.5          |
| $\tau_m$ (ms) (using -120pA ZD trace)            | 32.3          | 33.8          | 39.3          |

931 We note that for the comparison of membrane time constants of the OLM cells used, we fitted  
 932 exponential curves to the charging portion of  $V_m$  for each cell at various time points of the recording  
 933 session using a nonlinear least squares regression (**Figure 2**). The amplitude of the traces were  
 934 normalized at the time point at which depolarizing responses in the *"TTX traces"* (i.e., #4 in **Table 5**  
 935 when TTX/4-AP/TEA applied), due to the h-channel current ( $I_h$ ) cause the membrane potential to  
 936 deviate from the (putatively) passive response under the *"ZD traces"* (i.e., #7 in **Table 5** when ZD7288

937 also applied). For each cell, both the -30pA and -120pA ZD traces were used to compare to the  
938 TTX traces, as these should both reflect largely passive membrane responses. We note that for  
939 most cells, the -30pA TTX trace followed the -30pA ZD trace (left) as well as the -120pA ZD trace  
940 (right), **Figure 2**. *Cell 1* in particular exhibited a very good match between the -30pA TTX and -120pA  
941 ZD traces. The fitted  $\tau_m$  values for the -120pA ZD trace and -30pA TTX trace are given in **Table 7**.  
942 We also fitted the membrane time constant for the models, using a -120pA current clamp step  
943 in the models without  $I_h$  included (see **Table 7**). Resulting  $V_m$  traces were fit in the same way as  
944 the experimental traces, except that the  $V_m$  data points were weighted by the relative time step of  
945 integration in the NEURON simulations such that data points in the  $V_m$  vector closely spaced in time  
946 would be weighed less. This ensured that the fit was not disproportionately weighed by the early,  
947 rapidly changing charging portion with many more data points.  
948 Compartmentalization of the models was done in NEURON using the  $d_\lambda$  rule where compartment  
949 lengths are set to a fraction of the length constant  $\lambda_f$ , where  $f=100\text{Hz}$ . We set the fraction of  $d_\lambda$   
950 to be 0.1 for all models. **Table 7** gives the resulting number of compartments in each of the cells,  
951 along with their surface areas in the finalized models, that is, after staggered re-fitting.

### 952 **Mathematical equations for h-channels**

953 The specification of the current for h-channels,  $I_h$ , was taken from our previous work (**Lawrence**  
954 **et al., 2006b; Sekulić et al., 2014**). However, the kinetics for activation and deactivation, the steady-  
955 state activation curves, and the conductance densities were defined on a per-cell basis in the  
956 present work (see Results). This required moving the relevant variables in the  $I_h$  MOD-file into the  
957 PARAMETER block to allow per-cell configuration in the NEURON code.

958 The conductance-based mathematical formulation used to represent current flow through h-  
959 channels is given by:

$$I_h = G_h \cdot r (V - E_h) \quad (1)$$

$$\frac{dr}{dt} = \frac{r_\infty - r}{\tau_h} \quad (2)$$

$$r_\infty = \frac{1}{1 + \exp\left(\frac{V - V_{1/2}}{k}\right)} \quad (3)$$

960 where  $G_h$  is the maximal synaptic conductance for the h-channels,  $r$  is the activation variable,  $E_h$  is  
961 the h-channel reversal potential,  $r_\infty$  is the steady-state activation,  $k$  is the slope of activation and  
962  $V_{1/2}$  is the potential of half-maximal activation of  $I_h$ ,  $\tau_h$  is the time constant of activation,  $V$  is the  
963 membrane potential, and  $t$  is time. The voltage dependence of  $\tau_h$  is given by a double exponential  
964 expression with parameters  $t_1, t_2, t_3, t_4, t_5$  as follows:

$$\tau_h(V) = \frac{1}{\exp(-t_1 - t_2 V) + \exp(-t_3 + t_4 V)} + t_5 \quad (4)$$

### 965 **Extraction of h-channel characteristics from voltage and current clamp traces**

966 Given our experimental protocol (see **Table 5**), we were able to obtain h-channel current ( $I_h$ ) reversal  
967 potentials, activation kinetics, and steady-state activation for each of the three chosen cells.

968 *Reversal potential:* To obtain the reversal potential for  $I_h$ , we first removed the leak components  
969 and capacitive transients from the voltage clamp recordings in order to isolate the  $I_h$  components.  
970 This was done by taking the traces obtained by the reversal potential protocol (#6 in **Table 5**) and  
971 subtracting from them the capacitive response generated by an equivalent magnitude voltage  
972 clamp deflection from the  $I_h$  activation protocol with ZD7288 application (#7 in **Table 5**), resulting  
973 in  $I_h$  tail currents **Figure 3-Figure Supplement 1A**). The traces were then smoothed using the  
974 *rl*oess smoothing function in MATLAB, which performs local linear regression over a window, using  
975 weighted linear least squares. The smoothing window was set to 25ms so that only noise in the  
976 recordings was removed, and not time-dependent changes attributable to ion channel currents.

977 To create the current-voltage (I-V) plot, a fixed time point after the capacitive transient ended was  
978 determined by eye, which allowed us to obtain the time point of maximum deflection after the  
979 voltage clamp step (*Magee, 1998; Molleman, 2003*). We refer to this as the “fixed” time point for  
980 determining the I-V plot. The validity of this technique relies on the assumption that the maximal  
981 number of h-channels are still open by the time the capacitive transient is abolished, so that the  
982 resulting current does not depend on changes in the conductance, only on the driving force. The  
983 fact that  $I_h$  deactivates slowly means that this assumption is likely to be a safe one. However, to  
984 account for the possibility of early channel closure, a second method for extracting the current  
985 values and constructing an I-V plot was used. This consisted of fitting single exponential functions  
986 to the time course of the decay of current upon the step relaxation of the voltage clamp, which  
987 is used primarily to determine the voltage-dependent time constants of deactivation. The fitted  
988 exponential functions were then evaluated at the time of the relaxation of the voltage clamp step.  
989 In this way, we could deduce the amount of current that is masked by the capacitive transient  
990 by extrapolating the value from the exponential functions that were fitted on the non-capacitive  
991 portions of the current trace. That is, the functions were fitted to a window corresponding to the  
992 fixed point as the start time, and the end of the voltage clamp step as the end time. We refer to  
993 the current values and resulting I-V plot as the “extrapolated” method. We note that the smoothed  
994 traces were only used for the fixed method so that noisy fluctuations in the current traces did  
995 not unduly influence the resulting I-V plot; however, for the extrapolated method the exponential  
996 functions were fitted using the original, non-smoothed subtracted traces. The current traces with  
997 fitted exponentials are shown in *Figure 3-Figure Supplement 1A*, and I-V plots for both fixed and  
998 extrapolated methods are shown in *Figure 3A*. The resulting reversal potential ( $E_h$ ) values for each  
999 cell were determined by fitting a first-order polynomial to the linear portion of the I-V curve only. For  
1000 *Cell 1* and *Cell 2*, the linear portion of the extrapolated I-V curve overlapped with the fixed I-V curve,  
1001 and the resulting  $E_h$  values were similar between the two methods. For these cells, we therefore  
1002 took  $E_h$  from the extrapolated I-V curves. For *Cell 3*, however, the capacitive transients disrupted  
1003 the response and affected the fitting so that the extrapolated I-V values did not exhibit as strong of  
1004 a linear relationship as the fixed I-V values. One possible explanation for the distorted (non-linear)  
1005 measurements of I-V values with *Cell 3* is that the current traces for  $I_h$  deactivation, from which the  
1006 reversal potential I-V plots were determined, did not match fully between the control case (with only  
1007 TTX/4-AP/TEA blockers) and the later protocol with the  $I_h$  blocker ZD7288, due to the effects of noise.  
1008 Thus, the subtraction of the two to remove the leak components introduced some distortion in the  
1009 resulting current traces. As a result, although the resulting  $E_h$  values between extrapolated and  
1010 fixed points were similar, we took  $E_h$  for *Cell 3* from the fixed I-V curve instead, to minimize possible  
1011 error from using the line fitted with only 4 out of the 8 possible I-V datapoints (*Figure 3A, Cell 3*).  
1012 The resulting  $E_h$  values for all cells are given in *Table 8*. These values are in general agreement with  
1013 literature values of  $I_h$  reversal potentials in OLM cells (*Maccaferri and McBain, 1996*).

1014 *Voltage-dependent time constant of activation and deactivation and steady-state activation:* To obtain the  
1015 time constants of activation/deactivation for  $I_h$  ( $\tau_h$ ) we used the recordings where a voltage clamp  
1016 protocol with an initial clamp at a holding potential was then stepped to various hyperpolarized  
1017 potentials, measuring the resulting transmembrane current (#3 in *Table 5*). The identical protocol  
1018 was then performed with the  $I_h$ -specific blocker ZD7288 (#8 in *Table 5*). Using this data, we  
1019 subtracted the ZD7288 traces from the control traces to isolate  $I_h$ . Then, single exponential  
1020 functions were fitted to the time-varying change in current upon each voltage step.  $I_h$  showed no  
1021 voltage-dependent inactivation (*Figure 3-Figure Supplement 1B*). To construct the curve of voltage-  
1022 dependent activation and deactivation kinetics, the time constants of activation were combined with  
1023 the deactivation time constants obtained from the tail currents (*Figure 3-Figure Supplement 1A*).  
1024 The time course of activation and deactivation was then described using a double exponential  
1025 function of the form given by Equation (4) in the Methods, with parameters  $t_1, t_2, t_3, t_4, t_5$  to be fit.  
1026 Fitting of the double exponential functions was done using the Curve Fitting toolbox in MATLAB. The

**Table 8.**  $I_h$  parameter values obtained from fits to experimental data of each cell and computed conductance densities for somatic or somatodendritic distributions.

| <b>Parameter</b>                                 | <b>Cell 1</b>         | <b>Cell 2</b>         | <b>Cell 3</b> |
|--------------------------------------------------|-----------------------|-----------------------|---------------|
| $E_h$ (mV)                                       | -34.0                 | -27.9                 | -25.2         |
| $V_{1/2}$ (mV)                                   | -103.4                | -100.1                | -111.3        |
| $k$ (slope factor)                               | 8.63                  | 11.16                 | 6.88          |
| $t_1$ (ms)                                       | 8.03                  | 8.98                  | 35.09         |
| $t_2$ (ms)                                       | 0.025                 | 0.035                 | 0.24          |
| $t_3$ (ms)                                       | -4.40                 | -8.49                 | -4.28         |
| $t_4$ (ms)                                       | 0.15                  | 0.19                  | 0.088         |
| $t_5$ (ms)                                       | $7.32 \times 10^{-6}$ | $3.57 \times 10^{-7}$ | 69.72         |
| Total $G_h$ (nS)                                 | 4.17                  | 3.64                  | 2.20          |
| Soma surface area ( $\mu\text{m}^2$ )            | 7,650.9               | 13,034.5              | 6,910.5       |
| Somatodendritic surface area ( $\mu\text{m}^2$ ) | 29,378.1              | 35,158.5              | 21,990.3      |
| $G_h$ (pS/ $\mu\text{m}^2$ ), $H_{dist}=0$       | 0.546                 | 0.279                 | 0.380         |
| $G_h$ (pS/ $\mu\text{m}^2$ ), $H_{dist}=1$       | 0.142                 | 0.104                 | 0.120         |

1027 resulting fitted values for the voltage-dependent time constant of activation and deactivation are  
 1028 given in **Table 8** and plotted in **Figure 3B**. We note that the shape of the time constant of activation  
 1029 function is roughly similar across the three cells, with particular overlap between *Cell 1* and *Cell 2*. In  
 1030 all three cases, the slowest component of the time constant activation function is around 300 ms,  
 1031 whereas the fast component is less than 100 ms for all three cells.

1032 **Steady-state activation:** The steady-state activation curves,  $r_\infty$ , for the OLM cells were constructed  
 1033 by measuring the current amplitude in the ZD7288-subtracted traces at the end of each step  
 1034 of the voltage clamp protocol for  $I_h$  activation (**Figure 3-Figure Supplement 1B**). The current at  
 1035 each voltage step was plotted and normalized to the greatest recorded current value which for  
 1036 h-channels is at the most hyperpolarized range. Then, a Boltzmann function for  $r_\infty$  (Equation (3) in  
 1037 Methods) with parameters  $V_{1/2}$  for the voltage at half-activation and slope factor  $k$  for the steepness  
 1038 of the sigmoidal curve, was fitted to each cell's voltage-dependent activation data. The fitted values  
 1039 are given in **Table 8**, and the resulting activation curves for the three cells are shown in **Figure 3C**.

1040 **Maximal conductances:** To determine the maximal conductance for  $I_h$ ,  $G_h$ , we used the tail currents  
 1041 from the reversal potential step protocol as this corresponded to the point in time when  $I_h$  was  
 1042 fully activated (**Dougherty et al., 2013; Magee, 1998**). These currents were thus measured when  
 1043 all h-channels are opened, and thus describe the ratio of maximum current to voltage needed to  
 1044 obtain I-V plots for determining  $G_h$  (**Molleman, 2003**). The slope of the linear portion of the I-V plot  
 1045 for the tail currents, with the reversal potential as origin (denoting zero current flow), was used as  
 1046 the measure of  $G_h$ . As described above, a line was fitted to the linear portion of the I-V plots for  
 1047 all three cells to determine the reversal potential. The slope of the line gives  $G_h$  and the resulting  
 1048 values for the three cells are given in **Table 8**. When scaled by the surface area, we obtain an  $G_h$  as  
 1049 a conductance density that is used in the model code.

### 1050 **Staggered model re-fitting considerations with h-channels**

1051 In consideration of a re-fitting procedure, we noted that if we wanted to judiciously tune individual  
 1052 parameters in such a manner that for a given portion of each  $V_m$  trace, the parameters that can be  
 1053 responsible for affecting that portion of the trace should be tuned in the order from those with  
 1054 the greatest uncertainty to those with the least uncertainty. Using as an example the (passive  
 1055 property) scenario of the initial charging portion of the membrane upon step hyperpolarizing  
 1056 current, although we would expect all of  $C_m$ ,  $R_a$ ,  $\tau_h$  and  $r_\infty$  to affect this portion of the trace to

1057 various degrees, it would have been a mistake to fit, say,  $r_\infty$  prior to fitting  $C_m$ . This is not only  
1058 because  $I_h$  wouldn't yet be fully activated but also because the fitted function for  $r_\infty$  exhibits a  
1059 very good match to the recorded steady state current values for multiple voltage steps (**Figure 3C**),  
1060 whereas the fit for  $C_m$  has more uncertainty due to the issues of dendritic diameter estimation as  
1061 well as cell rundown seen in the recordings used for fitting, as previously described. If we were  
1062 to have fitted  $r_\infty$  first, we would have attributed an undue source of error of the mismatch in  $V_m$   
1063 to  $r_\infty$ . The disproportionate change in  $r_\infty$  curve would then have manifested in inappropriate  $V_m$   
1064 output elsewhere. Therefore, the criterion for whether we had selected an appropriate parameter  
1065 for re-fitting was that if the re-fitted parameter resulted in a better fit to the portion of  $V_m$  trace  
1066 under consideration but a worse fit elsewhere, then we had not selected the correct parameter  
1067 for which the error in  $V_m$  mismatch should be attributed to. In practice we could perform this test  
1068 by fitting to one set of current clamp traces and validating the model's correctness by testing its  
1069 output to another current clamp step trace without re-fitting the parameter.  
1070 The approach of inappropriately attributing errors to parameters, taken to its extreme, would be  
1071 to allow all parameters to be adjusted simultaneously. We demonstrate the results of this "naïve"  
1072 scheme by allowing the passive properties (4 parameters) and  $I_h$  properties (9 parameters) to  
1073 simultaneously vary while using the PRAXIS fitting procedure in NEURON to minimize the error in  
1074  $V_m$  response between model and experiment. Let us use *Cell 3* as an example. When first fitted  
1075 to the -120pA current clamp step TTX trace, the model exhibited a remarkably good fit to the  
1076 experimental  $V_m$  trace (**Figure 4-Figure Supplement 1A**, left) which, at first glance, would indicate  
1077 that the OLM cell's output had been captured. However, when we then injected a -90pA current  
1078 clamp step in the model with these fitted parameters as a test and compared its output to that  
1079 of the experimental cell, we saw that it was very poor at matching the -90pA TTX current trace  
1080 response (**Figure 4-Figure Supplement 1A**, right). If we instead fitted to the -90pA current clamp TTX  
1081 trace, we found that the model could also match the experimental  $V_m$  output quite well (**Figure 4-**  
1082 **Figure Supplement 1B**, right) but then it failed to capture the -120pA output when used as a test  
1083 (**Figure 4-Figure Supplement 1B**, left). It is important to note that in doing the fits and tests, we  
1084 ensured that the holding current applied to the model was always in line with what was used for  
1085 the particular cell at the given current step, although fitted parameters were not changed between  
1086 fits and tests. This "overfitting" of the experimental data used for adjusting the parameters was thus  
1087 inappropriate, and a more judicious procedure was required, where only a subset of parameters  
1088 were considered at any given time and for any given feature of the  $V_m$  mismatch between model  
1089 and experiment.

### 1090 **Full spiking multi-compartment model optimizations**

1091 In creating full spiking models, we used the final passive model backbone with h-channels in the  
1092 dendrites, and used the same complement of ion channel types that had been used in previous  
1093 instantiations of the OLM cell model (**Lawrence et al., 2006b; Sekulić et al., 2014**). The equations  
1094 used are all given in the Appendix of **Lawrence et al. (2006b)**. They include transient sodium,  
1095 fast and slow delayed rectifier potassium, A-type potassium, M-type, T- and L-type calcium, and  
1096 calcium-dependent potassium channels. Their conductances in soma (*s*), axon (*a*) or dendrites (*d*)  
1097 are represented respectively as  $G_{NaT}$ ,  $G_{Kdrf}$ ,  $G_{Kdrs}$ ,  $G_{KA}$ ,  $G_M$ ,  $G_{CaT}$ ,  $G_{CaL}$ ,  $G_{KCa}$  as given in **Table 9**.

1098 In our optimizations, we allowed  $G_{NaT}$ ,  $G_{Kdrf}$ ,  $G_{Kdrs}$  to vary independently in the soma, dendrites,  
1099 and axon, and we also allowed the sodium channel to have some flexibility by allowing alterations  
1100 in its voltage dependency, i.e., introducing a free parameter,  $V_{shift}$  that could change by  $\pm 7$  mV.  
1101 Note that soma, dendrites, and axon each have an independent  $V_{shift}$  parameter, but the  $V_{shift}$   
1102 value remains the same across forward and backward rate activations and inactivations such  
1103 that activation and inactivation curves shift by the same amount and the "activation/inactivation  
1104 window" stays constant. Except for the inclusion of  $V_{shift}$ , the activation and inactivation equations  
1105 underlying the sodium current are the same as used previously (**Lawrence et al., 2006b**), and as  
1106 based on experimental data of **Martina et al. (2000)**. For completeness, the equations for the

**Table 9.** Location and optimization ranges for ion channel types.

| <b>Conductance type</b> | <b>Distribution location</b> | <b>Cell 1 range (pS/<math>\mu\text{m}^2</math>)</b> | <b>Cell 2 range (pS/<math>\mu\text{m}^2</math>)</b> |
|-------------------------|------------------------------|-----------------------------------------------------|-----------------------------------------------------|
| $G_{NaT,s}$             | soma                         | 10-100                                              | 10-100                                              |
| $G_{NaT,d}$             | dendrites                    | 40-200                                              | 40-200                                              |
| $G_{NaT,a}$             | axon                         | 40-200                                              | 40-200                                              |
| $G_{Kdrf,s}$            | soma                         | 3-200                                               | 50-200                                              |
| $G_{Kdrf,d}$            | dendrites                    | 3-200                                               | 50-200                                              |
| $G_{Kdrf,a}$            | axon                         | 3-200                                               | 50-200                                              |
| $G_{Kdrs,s}$            | soma                         | 0-0.01                                              | 0-0.01                                              |
| $G_{Kdrs,d}$            | dendrites                    | 0-0.01                                              | 0-0.01                                              |
| $G_{Kdrs,a}$            | axon                         | 0-0.01                                              | 0-0.01                                              |
| $G_{KA}$                | soma, dendrites              | 1.25-120                                            | 1.25-120                                            |
| $G_M$                   | soma, dendrites              | 0.05-1.5                                            | 0.05-1.5                                            |
| $G_{CaT}$               | dendrites                    | 0.625-5                                             | 0.625-5                                             |
| $G_{CaL}$               | dendrites                    | 6.25-50                                             | 6.25-50                                             |
| $G_{KCa}$               | dendrites                    | 1.375-11                                            | 1.375-11                                            |

1107 sodium current,  $I_{NaT}$ , are shown below:

$$I_{NaT} = G_{NaT} \cdot m^3 h (V - E_h) \quad (5)$$

$$\frac{dm}{dt} = \alpha_m(1 - m) - \beta_m m \quad (6)$$

$$\frac{dh}{dt} = \alpha_h(1 - h) - \beta_h h \quad (7)$$

(8)

1108 where, for somatic compartments,

$$\alpha_m(V) = \frac{-0.1(V + 38 - V_{shift})}{\exp(-(V + 38 - V_{shift})/10) - 1} \quad (9)$$

$$\beta_m(V) = 4 \exp(-(V + 63 - V_{shift})/18) \quad (10)$$

$$\alpha_h(V) = 0.07 \exp(-(V + 63 - V_{shift})/20) \quad (11)$$

$$\beta_h(V) = \frac{1}{1 + \exp(-(V + 33 - V_{shift})/10)} \quad (12)$$

1109 and for dendritic and axonal compartments,

$$\alpha_m(V) = \frac{-0.1(V + 45 - V_{shift})}{\exp(-(V + 45 - V_{shift})/10) - 1} \quad (13)$$

$$\beta_m(V) = 4 \exp(-(V + 70 - V_{shift})/18) \quad (14)$$

$$\alpha_h(V) = 0.07 \exp(-(V + 70 - V_{shift})/20) \quad (15)$$

$$\beta_h(V) = \frac{1}{1 + \exp(-(V + 40 - V_{shift})/10)} \quad (16)$$

1110 Optimization Approach and Parameter Details

1111 For the optimizations, we did the following:

- 1112 1. Performed multi-objective optimizations using the BluePyOpt module in Python (**Van Geit**  
 1113 **et al., 2016**) and high performance computing resources via the Neuroscience Gateway  
 1114 (**Sivagnanam et al., 2013**) to find ion channel conductances in order to minimize the error  
 1115 across multiple features in the electrophysiology - see **Table 10**.



**Table 10.** Descriptions of the eFEL measurements that were used as objective features in the spiking model optimizations. AP: Action Potential; AHP: After-Spike Hyperpolarization. Consult the eFEL manual for more details on these measurements: <https://media.readthedocs.org/pdf/efel/latest/efel.pdf>

| <b>Name</b>                           | <b>Description</b>                                                                                                                                              |
|---------------------------------------|-----------------------------------------------------------------------------------------------------------------------------------------------------------------|
| 1. AP_amplitude_from_voltagebase (mV) | The height of the AP measured from voltage base.                                                                                                                |
| 2. AP_width (ms)                      | Width of each peak at the value of threshold.                                                                                                                   |
| 3. AP_amplitude (mV)                  | The relative height of the AP between the peak voltage and the voltage where the first derivative is higher than 12 V/s, for at least 5 points.                 |
| 4. AHP_time_from_peak (ms)            | Time between AP peaks and AHP depths.                                                                                                                           |
| 5. time_to_first_spike (ms)           | Time from the start of the stimulus to the maximum of the first peak.                                                                                           |
| 6. voltage_base (mV)                  | The resting membrane potential before the current step.                                                                                                         |
| 7. AP_amplitude_change                | Difference of the amplitudes of the second and the first AP divided by the amplitude of the first AP.                                                           |
| 8. AP_duration_half_width (ms)        | Full width at half maximum of each action potential.                                                                                                            |
| 9. AHP_depth (mV)                     | Relative voltage difference between the minimum AHP voltage and the voltage base.                                                                               |
| 10. mean_frequency (Hz)               | The mean frequency of the firing rate.                                                                                                                          |
| 11. AHP_slow_time                     | Time difference between absolute voltage values at the first after-hyperpolarization starting 5 ms after the peak and the peak, divided by interspike interval. |
| 12. adaptation_index                  | Normalized average difference of two consecutive ISIs.                                                                                                          |

1116 2. Fine-tuned the parameter ranges and objectives to avoid areas of the parameter space that  
 1117 generate undesirable results and keep re-doing the optimizations using this approach until  
 1118 the top models consistently generate appropriate electrophysiologies. The parameter ranges  
 1119 used that produced the final models are shown in **Table 9**.

1120 The top five optimized models for *Cell 1* and *Cell 2* are presented in **Figure 7** and **Figure 7, Figure**  
 1121 **Supplement 3**. Their fitness values are: (*Cell 1*: 411.53, 425.38, 430.68, 430.93, 438.65; *Cell 2*: 660.96,  
 1122 665.49, 669.06, 678.58, 684.60.).

1123 In order of model rankings (i.e. [1<sup>st</sup>, ..., 5<sup>th</sup>]), the values below are the  $V_{shift}$  parameters (in mV) for  
 1124 the top five full spiking models (see **Figure 7, Figure Supplement 4C** to see the resulting voltage-  
 1125 dependencies).

1126 *Cell 1*:  $V_{shift,s} = [-4.83, -6.55, -6.70, -6.46, -6.68]$ ,  $V_{shift,d} = [4.85, 6.37, 3.71, 2.86, 4.17]$ ,

1127  $V_{shift,a} = [2.49, 2.82, 2.84, 5.70, 2.82]$ .

1128 *Cell 2*:  $V_{shift,s} = [-4.36, -4.69, -4.88, -4.36, -4.36]$ ,  $V_{shift,d} = [-1.26, -1.12, -0.54, -1.46, -1.41]$ ,

1129  $V_{shift,a} = [6.57, 6.57, 6.30, 6.57, 6.57]$ .

1130 After performing several optimizations and adjusting the parameters to improve the optimization  
 1131 outputs, we used the following optimization parameters for both models: Number of Offspring =  
 1132 100, Number of Generations = 200, Mutation Rate = 0.15, Crossover Rate = 0.85, Eta (i.e. learning  
 1133 rate) = 0.5, Optimizer = 'IBEA', Random Seed = 61 (*Cell 1*) and 9 (*Cell 2*)

1134 All of the objective features that were used in the optimization are listed in **Table 10**, and the  
 1135 parameter ranges are given in **Table 9**. Features 1-10 were used for the +30 pA, +60 pA, and +90  
 1136 pA current injection protocols. Features 11-12 were only used for the +60 pA and +90 pA current  
 1137 injection protocols, since the +30 pA current injection did not always generate a sufficient number  
 1138 of spikes for those features to be calculated. Since we were fitting the models to single current  
 1139 injection traces, standard deviation values were chosen manually for each objective feature, in  
 1140 order to weight each objective feature by hand. Since standard deviation is used in computing the  
 1141 fitness for each model (i.e. fitness is quantified as the sum of standard deviations away from the

1142 experimental target efeature values), manipulating these values offered a way to weight particular  
1143 target measurements. More specifically, we initially chose standard deviations that were 1-2 order  
1144 of magnitudes smaller than the largest significant digit for each measurement. For example,  
1145 AP\_duration\_half\_width in the somatic area of a neuron is usually a small value between 0.5-2  
1146 ms, and we used a standard deviation of 0.01 ms for this efeature. If the optimization ended  
1147 up under-performing on any specific efeature measurements, we would sometimes attempt to  
1148 improve it by using smaller standard deviation values for those measurements. Though this had  
1149 some mild effects on improving the optimizations, constraining the free parameter ranges ended up  
1150 showing much better improvements in the optimization results. We also added a heavy penalization  
1151 on models that generated spikes during the baseline periods. Finally, in order to make BluePyOpt  
1152 compatible with the OLM cell model compartmentalization, we adjusted BluePyOpt's method for  
1153 compartmentalization such that it uses the  $d_\lambda$  rule.

1154 To check if axonal properties were appropriate for what is known experimentally (*Martina et al.,*  
1155 *2000*), we performed simulations with our final optimized spiking models of *Cell 1* and *Cell 2* to  
1156 investigate morphological sites of action potential (AP) initiation. Specifically, *Martina et al. (2000)*  
1157 previously showed that depending on whether a short high-intensity current or a long low-intensity  
1158 current was injected into the soma, an AP would occur initially in the soma or axon-bearing dendrite,  
1159 respectively. For both models of *Cell 1* and *Cell 2*, short high-intensity current evoked action potential  
1160 initiation in the soma, but long low-intensity current evoked action potential initiation in axon-lacking  
1161 dendrites. This suggests that specialized distributions of spike-initiating channels are missing in the  
1162 axon of the model and are necessary for correctly setting the action potential initiation site. Given  
1163 that OLM cell axonal channel properties are unknown, we did not venture further into specializing  
1164 axonal properties in our models.

### 1165 **Code and data availability**

1166 NEURON code for all the models are available on <https://github.com/FKSkinnerLab/OLMng> and  
1167 associated experimental data available on <https://osf.io/qvnu9/>.

### 1168 **Acknowledgments**

1169 Work on the Chrna2-CRE:tdTomato mice was performed under an established Material Transfers  
1170 Agreement between Uppsala University and Texas Tech University Health Sciences University under  
1171 Dr. Klas Kullander. We thank Drs. Sanja Mikulovic and Klas Kullander for their help at early stages  
1172 of immunocytochemical experiments. Preliminary studies of this work have appeared in the form  
1173 of several published Society for Neuroscience poster abstracts. FKS thanks Dr. Scott Rich for an  
1174 overall reading of this work.

### 1175 **References**

- 1176 **Abbas AI**, Sundiang MJM, Henoch B, Morton MP, Bolkan SS, Park AJ, Harris AZ, Kellendonk C, Gordon JA.  
1177 Somatostatin Interneurons Facilitate Hippocampal-Prefrontal Synchrony and Prefrontal Spatial Encoding.  
1178 *Neuron*. 2018 Nov; 100(4):926–939.e3. doi: [10.1016/j.neuron.2018.09.029](https://doi.org/10.1016/j.neuron.2018.09.029).
- 1179 **Abrahamsson T**, Cathala L, Matsui K, Shigemoto R, DiGregorio D. Thin Dendrites of Cerebellar Interneurons  
1180 Confer Sublinear Synaptic Integration and a Gradient of Short-Term Plasticity. *Neuron*. 2012 Mar; 73(6):1159–  
1181 1172. doi: [10.1016/j.neuron.2012.01.027](https://doi.org/10.1016/j.neuron.2012.01.027).
- 1182 **Almog M**, Korngreen A. Is realistic neuronal modeling realistic? *Journal of Neurophysiology*. 2016 Aug; p.  
1183 jn.00360.2016. doi: [10.1152/jn.00360.2016](https://doi.org/10.1152/jn.00360.2016).
- 1184 **Alonso LM**, Marder E. Visualization of currents in neural models with similar behavior and different conductance  
1185 densities. *eLife*. 2019 Jan; 8. doi: [10.7554/eLife.42722](https://doi.org/10.7554/eLife.42722).
- 1186 **Angelo K**, London M, Christensen SR, Hausser M. Local and Global Effects of Ih Distribution in Dendrites of  
1187 Mammalian Neurons. *Journal of Neuroscience*. 2007 Aug; 27(32):8643–8653. doi: [10.1523/JNEUROSCI.5284-  
1188 06.2007](https://doi.org/10.1523/JNEUROSCI.5284-06.2007).

- 1189 **Bassett DS**, Zurn P, Gold JJ. On the nature and use of models in network neuroscience. *Nature Reviews*  
1190 *Neuroscience*. 2018 Sep; 19(9):566–578. doi: 10.1038/s41583-018-0038-8.
- 1191 **Beaulieu-Laroche L**, Toloza EHS, van der Goes MS, Lafourcade M, Barnagian D, Williams ZM, Eskandar EN,  
1192 Frosch MP, Cash SS, Harnett MT. Enhanced Dendritic Compartmentalization in Human Cortical Neurons. *Cell*.  
1193 2018 Oct; 175(3):643–651.e14. doi: 10.1016/j.cell.2018.08.045.
- 1194 **Biel M**, Wahl-Schott C, Michalakis S, Zong X. Hyperpolarization-Activated Cation Channels: From Genes to  
1195 Function. *Physiological Reviews*. 2009 Jul; 89(3):847–885. doi: 10.1152/physrev.00029.2008.
- 1196 **Bischofberger J**, Engel D, Li L, Geiger JR, Jonas P. Patch-clamp recording from mossy fiber terminals in hip-  
1197 pocampal slices. *Nature Protocols*. 2006; 1(4):2075–2081. <http://www.nature.com/articles/nprot.2006.312>,  
1198 doi: 10.1038/nprot.2006.312.
- 1199 **Blasco-Ibáñez JM**, Freund TF. Synaptic input of horizontal interneurons in stratum oriens of the hippocampal  
1200 CA1 subfield: structural basis of feed-back activation. *Eur J Neurosci*. 1995; 7(10):2170–2180.
- 1201 **Borhegyi Z**, Varga V, Szilágyi N, Fabo D, Freund TF. Phase segregation of medial septal GABAergic neurons during  
1202 hippocampal theta activity. *The Journal of Neuroscience: The Official Journal of the Society for Neuroscience*.  
1203 2004 Sep; 24(39):8470–8479. doi: 10.1523/JNEUROSCI.1413-04.2004.
- 1204 **Boyce R**, Glasgow SD, Williams S, Adamantidis A. Causal evidence for the role of REM sleep theta rhythm in  
1205 contextual memory consolidation. *Science*. 2016 May; 352(6287):812–816. doi: 10.1126/science.aad5252.
- 1206 **Brown HF**, DiFrancesco D, Noble SJ. How does adrenaline accelerate the heart? *Nature*. 1979 Jul; 280(5719):235.  
1207 doi: 10.1038/280235a0.
- 1208 **Bucher D**, Prinz AA, Marder E. Animal-to-Animal Variability in Motor Pattern Production in Adults and during  
1209 Growth. *Journal of Neuroscience*. 2005 Feb; 25(7):1611–1619. doi: 10.1523/JNEUROSCI.3679-04.2005.
- 1210 **Cardin JA**. Inhibitory Interneurons Regulate Temporal Precision and Correlations in Cortical Circuits. *Trends in*  
1211 *Neurosciences*. 2018 Oct; 41(10):689–700. doi: 10.1016/j.tins.2018.07.015.
- 1212 **Cembrowski MS**, Spruston N. Heterogeneity within classical cell types is the rule: lessons from hippocampal  
1213 pyramidal neurons. *Nature Reviews Neuroscience*. 2019 Feb; p. 1. doi: 10.1038/s41583-019-0125-5.
- 1214 **Cembrowski M**, Bachman J, Wang L, Sugino K, Shields B, Spruston N. Spatial Gene-Expression Gradients  
1215 Underlie Prominent Heterogeneity of CA1 Pyramidal Neurons. *Neuron*. 2016 Jan; 89(2):351–368. doi:  
1216 10.1016/j.neuron.2015.12.013.
- 1217 **Chamberland S**, Salesse C, Topolnik D, Topolnik L. Synapse-specific inhibitory control of hippocampal feedback  
1218 inhibitory circuit. *Frontiers in Cellular Neuroscience*. 2010; 4:130. doi: 10.3389/fncel.2010.00130.
- 1219 **Chatzikalymniou AP**, Skinner FK. Deciphering the Contribution of Oriens-Lacunosum/Moleculare (OLM) Cells to  
1220 Intrinsic  $\theta$  Rhythms Using Biophysical Local Field Potential (LFP) Models. *eNeuro*. 2018 Jul; 5(4):ENEURO.0146-  
1221 18.2018. doi: 10.1523/ENEURO.0146-18.2018.
- 1222 **Chittajallu R**, Craig MT, Ashley M, Yuan X, Gerfen S, Tricoire L, Erkkila B, Barron SC, Lopez CM, Liang BJ, Jeffries  
1223 BW, Pelkey KA, J MC. Dual origins of functionally distinct O-LM interneurons revealed by differential 5-HT3AR  
1224 expression. . 2013; 16(11):1598–1607. doi: 10.1038/nn.3538.
- 1225 **Cutsuridis V**, Graham B, Cobb S, Vida I. *Hippocampal Microcircuits: A Computational Modeler's Resource Book*.  
1226 1st edition. ed. Springer; 2010.
- 1227 **Dougherty KA**, Nicholson DA, Diaz L, Buss EW, Neuman KM, Chetkovich DM, Johnston D. Differential expression  
1228 of HCN subunits alters voltage-dependent gating of h-channels in CA1 pyramidal neurons from dorsal and  
1229 ventral hippocampus. *Journal of Neurophysiology*. 2013 Apr; 109(7):1940–1953. doi: 10.1152/jn.00010.2013.
- 1230 **Ecker JR**, Geschwind DH, Kriegstein AR, Ngai J, Osten P, Polioudakis D, Regev A, Sestan N, Wickersham IR, Zeng  
1231 H. The BRAIN Initiative Cell Census Consortium: Lessons Learned toward Generating a Comprehensive Brain  
1232 Cell Atlas. *Neuron*. 2017 Nov; 96(3):542–557. doi: 10.1016/j.neuron.2017.10.007.
- 1233 **Emmenlauer M**, Ronneberger O, Ponti A, Schwarb P, Griffa A, Filippi A, Nitschke R, Driever W, Burkhardt H.  
1234 XuvTools: free, fast and reliable stitching of large 3D datasets. *Journal of Microscopy*. 2009 Jan; 233(1):42–60.  
1235 doi: 10.1111/j.1365-2818.2008.03094.x.

- 1236 **Eyal G**, Verhoog MB, Testa-Silva G, Deitcher Y, Lodder JC, Benavides-Piccione R, Morales J, DeFelipe J, Kock CPd,  
1237 Mansvelter HD, Segev I. Unique membrane properties and enhanced signal processing in human neocortical  
1238 neurons. *eLife*. 2016 Oct; 5:e16553. doi: [10.7554/eLife.16553](https://doi.org/10.7554/eLife.16553).
- 1239 **Fanselow MS**, Dong HW. Are the Dorsal and Ventral Hippocampus Functionally Distinct Structures? *Neuron*.  
1240 2010 Jan; 65(1):7–19. doi: [10.1016/j.neuron.2009.11.031](https://doi.org/10.1016/j.neuron.2009.11.031).
- 1241 **Fuhrmann F**, Justus D, Sosulina L, Kaneko H, Beutel T, Friedrichs D, Schoch S, Schwarz MK, Fuhrmann M, Remy S.  
1242 Locomotion, Theta Oscillations, and the Speed-Correlated Firing of Hippocampal Neurons Are Controlled by a  
1243 Medial Septal Glutamatergic Circuit. *Neuron*. 2015 Mar; 86(5):1253–1264. doi: [10.1016/j.neuron.2015.05.001](https://doi.org/10.1016/j.neuron.2015.05.001).
- 1244 **Gettet LJ**, Stuart GJ, Clements JD. Direct Measurement of Specific Membrane Capacitance in Neurons. *Biophys-*  
1245 *ical Journal*. 2000 Jul; 79(1):314–320. doi: [10.1016/S0006-3495\(00\)76293-X](https://doi.org/10.1016/S0006-3495(00)76293-X).
- 1246 **Glovelli T**, Dugladze T, Rotstein HG, Traub RD, Monyer H, Heinemann U, Whittington MA, Kopell NJ. Orthogonal  
1247 arrangement of rhythm-generating microcircuits in the hippocampus. *Proceedings of the National Academy*  
1248 *of Sciences of the United States of America*. 2005 Sep; 102(37):13295–13300. doi: [10.1073/pnas.0506259102](https://doi.org/10.1073/pnas.0506259102).
- 1249 **Goaillard JM**, Taylor AL, Schulz DJ, Marder E. Functional consequences of animal-to-animal variation in circuit  
1250 parameters. *Nature Neuroscience*. 2009 Nov; 12(11):1424–1430. doi: [10.1038/nn.2404](https://doi.org/10.1038/nn.2404).
- 1251 **Golowasch J**, Goldman MS, Abbott LF, Marder E. Failure of Averaging in the Construction of a Conductance-  
1252 Based Neuron Model. *Journal of Neurophysiology*. 2002 Feb; 87(2):1129–1131. doi: [10.1152/jn.00412.2001](https://doi.org/10.1152/jn.00412.2001).
- 1253 **Guet-McCreight A**, Skinner FK. Using computational models to predict in vivo synaptic inputs to interneuron  
1254 specific 3 (IS3) cells of CA1 hippocampus that also allow their recruitment during rhythmic states. *PLOS ONE*.  
1255 2019 Jan; 14(1):e0209429. doi: [10.1371/journal.pone.0209429](https://doi.org/10.1371/journal.pone.0209429).
- 1256 **Gulyás AI**, Görcs TJ, Freund TF. Innervation of different peptide-containing neurons in the hippocampus by  
1257 GABAergic septal afferents. *Neuroscience*. 1990; 37(1):31–44.
- 1258 **Harris KD**, Hochgerner H, Skene NG, Magno L, Katona L, Gonzales CB, Somogyi P, Kessaris N, Linnarsson  
1259 S, Hjerling-Leffler J. Classes and continua of hippocampal CA1 inhibitory neurons revealed by single-cell  
1260 transcriptomics. *PLOS Biology*. 2018 Jun; 16(6):e2006387. doi: [10.1371/journal.pbio.2006387](https://doi.org/10.1371/journal.pbio.2006387).
- 1261 **Hay E**, Hill S, Schürmann F, Markram H, Segev I. Models of Neocortical Layer 5b Pyramidal Cells Capturing a Wide  
1262 Range of Dendritic and Perisomatic Active Properties. *PLOS Computational Biology*. 2011 Jul; 7(7):e1002107.  
1263 doi: [10.1371/journal.pcbi.1002107](https://doi.org/10.1371/journal.pcbi.1002107).
- 1264 **Hines ML**, Carnevale NT. NEURON: a tool for neuroscientists. *The Neuroscientist: A Review Journal Bringing*  
1265 *Neurobiology, Neurology and Psychiatry*. 2001 Apr; 7(2):123–135.
- 1266 **Holmes WR**, Ambros-Ingerson J, Grover LM. Fitting experimental data to models that use morphological data  
1267 from public databases. *Journal of Computational Neuroscience*. 2006 Jun; 20(3):349–365. doi: [10.1007/s10827-006-7189-8](https://doi.org/10.1007/s10827-006-7189-8).
- 1269 **Holmes W R**. Passive Cable Modeling. In: De Schutter E, editor. *Computational Modeling Methods for Neuroscien-*  
1270 *tists* Cambridge, MA: MIT Press; 2010.p. 233–258.
- 1271 **Hughes D**, Boyle K, Kinnon C, Bilisland C, Quayle J, Callister R, Graham B. HCN4 subunit expression in  
1272 fast-spiking interneurons of the rat spinal cord and hippocampus. *Neuroscience*. 2013; 237:7–18. doi:  
1273 [10.1016/j.neuroscience.2013.01.028](https://doi.org/10.1016/j.neuroscience.2013.01.028).
- 1274 **Ito K**, Morita A, Aoki T, Nakajima H, Kobayashi K, Higuchi T. A fingerprint recognition algorithm combining  
1275 phase-based image matching and feature-based matching. In: *International Conference on Biometrics* Springer;  
1276 2006. p. 316–325. [http://link.springer.com/chapter/10.1007/11608288\\_43](http://link.springer.com/chapter/10.1007/11608288_43).
- 1277 **Jacobs G**, Claiborne B, Harris K. Reconstruction of Neuronal Morphology. In: De Schutter E, editor. *Computational*  
1278 *Modeling Methods for Neuroscientists* Cambridge, MA: MIT Press; 2010.p. 187–210.
- 1279 **Jaeger D**. Accurate reconstruction of neuronal morphology. In: De Schutter E, editor. *Computational Neuroscience:*  
1280 *Realistic Modeling for Experimentalists* Boca Raton, Fla: CRC Press; 2001.p. 159–178.
- 1281 **Katona L**, Lapray D, Viney TJ, Oulhaj A, Borhegyi Z, Micklem BR, Klausberger T, Somogyi P. Sleep and Movement  
1282 Differentiates Actions of Two Types of Somatostatin-Expressing GABAergic Interneuron in Rat Hippocampus.  
1283 *Neuron*. 2014 Apr; doi: [10.1016/j.neuron.2014.04.007](https://doi.org/10.1016/j.neuron.2014.04.007).

- 1284 **Kepecs A**, Fishell G. Interneuron cell types are fit to function. *Nature*. 2014 Jan; 505(7483):318–  
1285 326. [http://www.nature.com/myaccess.library.utoronto.ca/nature/journal/v505/n7483/full/nature12983.html?](http://www.nature.com/myaccess.library.utoronto.ca/nature/journal/v505/n7483/full/nature12983.html?WT.ec_id=NATURE-20140116#outlook)  
1286 [WT.ec\\_id=NATURE-20140116#outlook](http://www.nature.com/myaccess.library.utoronto.ca/nature/journal/v505/n7483/full/nature12983.html?WT.ec_id=NATURE-20140116#outlook), doi: 10.1038/nature12983.
- 1287 **Kispersky TJ**, Fernandez FR, Economo MN, White JA. Spike Resonance Properties in Hippocampal O-LM  
1288 Cells Are Dependent on Refractory Dynamics. *Journal of Neuroscience*. 2012 Mar; 32(11):3637–3651. doi:  
1289 [10.1523/JNEUROSCI.1361-11.2012](https://doi.org/10.1523/JNEUROSCI.1361-11.2012).
- 1290 **Klausberger T**. GABAergic interneurons targeting dendrites of pyramidal cells in the CA1 area of the hippocam-  
1291 pus. *European Journal of Neuroscience*. 2009; 30(6):947–957. doi: [10.1111/j.1460-9568.2009.06913.x](https://doi.org/10.1111/j.1460-9568.2009.06913.x).
- 1292 **Klausberger T**, Magill PJ, Márton LF, Roberts JDB, Cobden PM, Buzsáki G, Somogyi P. Brain-state- and cell-type-  
1293 specific firing of hippocampal interneurons in vivo. *Nature*. 2003 Feb; 421(6925):844–848. doi: 10.1038/na-  
1294 ture01374.
- 1295 **Klausberger T**, Somogyi P. Neuronal Diversity and Temporal Dynamics: The Unity of Hippocampal Circuit  
1296 Operations. *Science*. 2008 Jul; 321(5885):53–57. <http://www.sciencemag.org/content/321/5885/53.abstract>,  
1297 doi: [10.1126/science.1149381](https://doi.org/10.1126/science.1149381).
- 1298 **Kopell NJ**, Gritton HJ, Whittington MA, Kramer MA. Beyond the Connectome: The Dynome. *Neuron*. 2014 Sep;  
1299 83(6):1319–1328. doi: [10.1016/j.neuron.2014.08.016](https://doi.org/10.1016/j.neuron.2014.08.016).
- 1300 **Kramis R**, Vanderwolf CH, Bland BH. Two types of hippocampal rhythmical slow activity in both the rabbit and  
1301 the rat: Relations to behavior and effects of atropine, diethyl ether, urethane, and pentobarbital. *Experimental*  
1302 *Neurology*. 1975 Oct; 49(1):58–85. doi: 10.1016/0014-4886(75)90195-8.
- 1303 **Lawrence JJ**, Grinspan ZM, Statland JM, McBain CJ. Muscarinic receptor activation tunes mouse stratum  
1304 oriens interneurons to amplify spike reliability. *The Journal of Physiology*. 2006 Mar; 571(Pt 3):555–562.  
1305 <http://www.ncbi.nlm.nih.gov/pubmed/16439425>, doi: [10.1113/jphysiol.2005.103218](https://doi.org/10.1113/jphysiol.2005.103218).
- 1306 **Lawrence JJ**, Saraga F, Churchill JF, Statland JM, Travis KE, Skinner FK, McBain CJ. Somatodendritic Kv7/KCNQ/M  
1307 channels control interspike interval in hippocampal interneurons. *The Journal of Neuroscience: The Official*  
1308 *Journal of the Society for Neuroscience*. 2006 Nov; 26(47):12325–12338. [http://www.ncbi.nlm.nih.gov/pubmed/](http://www.ncbi.nlm.nih.gov/pubmed/17122058)  
1309 [17122058](http://www.ncbi.nlm.nih.gov/pubmed/17122058), doi: [10.1523/JNEUROSCI.3521-06.2006](https://doi.org/10.1523/JNEUROSCI.3521-06.2006).
- 1310 **Lawrence JJ**, Statland JM, Grinspan ZM, McBain CJ. Cell type-specific dependence of muscarinic signalling in  
1311 mouse hippocampal stratum oriens interneurons. *The Journal of Physiology*. 2006 Feb; 570(Pt 3):595–610.  
1312 <http://www.ncbi.nlm.nih.gov/pubmed/16322052>, doi: [10.1113/jphysiol.2005.100875](https://doi.org/10.1113/jphysiol.2005.100875).
- 1313 **Leão RN**, Mikulovic S, Leão KE, Munguba H, Gezelius H, Enjin A, Patra K, Eriksson A, Loew LM, Tort ABL, Kullander  
1314 K. OLM interneurons differentially modulate CA3 and entorhinal inputs to hippocampal CA1 neurons. *Nature*  
1315 *Neuroscience*. 2012; 15(11):1524–1530. doi: [10.1038/nn.3235](https://doi.org/10.1038/nn.3235).
- 1316 **Lörincz A**, Notomi T, Tamás G, Shigemoto R, Nusser Z. Polarized and compartment-dependent distribution of  
1317 HCN1 in pyramidal cell dendrites. *Nature Neuroscience*. 2002; 5(11):1185–1193. doi: 10.1038/nn962.
- 1318 **Lovett-Barron M**, Kaifosh P, Kheirbek MA, Danielson N, Zaremba JD, Reardon TR, Turi GF, Hen R, Zemelman  
1319 BV, Losonczy A. Dendritic Inhibition in the Hippocampus Supports Fear Learning. *Science*. 2014 Feb;  
1320 343(6173):857–863. doi: [10.1126/science.1247485](https://doi.org/10.1126/science.1247485).
- 1321 **Lovett-Barron M**, Losonczy A. Behavioral consequences of GABAergic neuronal diversity. *Current Opinion in*  
1322 *Neurobiology*. 2014 Jun; 26:27–33. doi: [10.1016/j.conb.2013.11.002](https://doi.org/10.1016/j.conb.2013.11.002).
- 1323 **Luo L**, Callaway EM, Svoboda K. Genetic Dissection of Neural Circuits: A Decade of Progress. *Neuron*. 2018 Apr;  
1324 98(2):256–281. doi: [10.1016/j.neuron.2018.03.040](https://doi.org/10.1016/j.neuron.2018.03.040).
- 1325 **Maccaferri G**, McBain CJ. The hyperpolarization-activated current (I<sub>h</sub>) and its contribution to pacemaker activity  
1326 in rat CA1 hippocampal stratum oriens-alveus interneurons. *The Journal of Physiology*. 1996 Nov; 497 ( Pt  
1327 1):119–130.
- 1328 **Maccaferri G**, David J, Roberts B, Szucs P, Cottingham CA, Somogyi P. Cell surface domain specific postsynaptic  
1329 currents evoked by identified GABAergic neurones in rat hippocampus in vitro. *The Journal of Physiology*.  
1330 2000 Apr; 524(1):91–116. doi: [10.1111/j.1469-7793.2000.t01-3-00091.x](https://doi.org/10.1111/j.1469-7793.2000.t01-3-00091.x).
- 1331 **Maccaferri G**, Lacaille JC. Interneuron Diversity series: Hippocampal interneuron classifications – mak-  
1332 ing things as simple as possible, not simpler. *Trends in Neurosciences*. 2003 Oct; 26(10):564–571. doi:  
1333 [10.1016/j.tins.2003.08.002](https://doi.org/10.1016/j.tins.2003.08.002).

- 1334 **Magee JC.** Dendritic Hyperpolarization-Activated Currents Modify the Integrative Properties of Hippocampal  
1335 CA1 Pyramidal Neurons. *Journal of Neuroscience*. 1998 Oct; 18(19):7613–7624.
- 1336 **Marder E, Goaillard JM.** Variability, compensation and homeostasis in neuron and network function. *Nature*  
1337 *Reviews Neuroscience*. 2006 Jul; 7(7):563–574. <http://www.ncbi.nlm.nih.gov/pubmed/16791145>, doi:  
1338 10.1038/nrn1949.
- 1339 **Marder E, Taylor AL.** Multiple models to capture the variability in biological neurons and networks. *Nat*  
1340 *Neurosci*. 2011 Feb; 14(2):133–138. <http://dx.doi.org/myaccess.library.utoronto.ca/10.1038/nn.2735>, doi:  
1341 10.1038/nn.2735.
- 1342 **Martina M, Vida I, Jonas P.** Distal initiation and active propagation of action potentials in interneuron dendrites.  
1343 *Science (New York, NY)*. 2000 Jan; 287(5451):295–300.
- 1344 **Marín O.** Interneuron dysfunction in psychiatric disorders. *Nature Reviews Neuroscience*. 2012 Feb; 13(2):107–  
1345 120. doi: 10.1038/nrn3155.
- 1346 **Matt L, Michalakis S, Hofmann F, Hammelmann V, Ludwig A, Biel M, Kleppisch T.** HCN2 channels in local  
1347 inhibitory interneurons constrain LTP in the hippocampal direct perforant path. *Cellular and Molecular Life*  
1348 *Sciences*. 2011 Jan; 68(1):125–137. doi: 10.1007/s00018-010-0446-z.
- 1349 **Mikulovic S, Restrepo CE, Hilscher MM, Kullander K, Leão RN.** Novel markers for OLM interneurons in the  
1350 hippocampus. *Frontiers in Cellular Neuroscience*. 2015; 9:201. doi: 10.3389/fncel.2015.00201.
- 1351 **Mikulovic S, Restrepo CE, Siwani S, Bauer P, Pupe S, Tort ABL, Kullander K, Leão RN.** Ventral hippocampal OLM  
1352 cells control type 2 theta oscillations and response to predator odor. *Nature Communications*. 2018 Sep;  
1353 9(1):3638. doi: 10.1038/s41467-018-05907-w.
- 1354 **Molleman A.** Patch clamping: an introductory guide to patch clamp electrophysiology. New York: J. Wiley; 2003.
- 1355 **Myatt D, Hadlington T, Ascoli G, Nasuto S.** Neuromantic – from Semi-Manual to Semi-Automatic Reconstruction  
1356 of Neuron Morphology. *Frontiers in Neuroinformatics*. 2012; 6. doi: 10.3389/fninf.2012.00004.
- 1357 **Müller C, Remy S.** Dendritic inhibition mediated by O-LM and bistratified interneurons in the hippocampus.  
1358 *Frontiers in Synaptic Neuroscience*. 2014; 6. doi: 10.3389/fnsyn.2014.00023.
- 1359 **Narayanan R, Johnston D.** Functional maps within a single neuron. *Journal of neurophysiology*. 2012 Nov;  
1360 108(9):2343–2351. doi: 10.1152/jn.00530.2012.
- 1361 **O’Leary T, Sutton AC, Marder E.** Computational models in the age of large datasets. *Current Opinion in*  
1362 *Neurobiology*. 2015 Jun; 32:87–94. <http://www.sciencedirect.com/science/article/pii/S095943881500015X>, doi:  
1363 10.1016/j.conb.2015.01.006.
- 1364 **Rall W, Burke RE, Holmes WR, Jack JJ, Redman SJ, Segev I.** Matching dendritic neuron models to experimental  
1365 data. *Physiological Reviews*. 1992 Oct; 72(suppl\_4):S159–S186. doi: 10.1152/physrev.1992.72.suppl\_4.S159.
- 1366 **Ransdell JL, Nair SS, Schulz DJ.** Neurons within the Same Network Independently Achieve Conserved Output by  
1367 Differentially Balancing Variable Conductance Magnitudes. *Journal of Neuroscience*. 2013 Jun; 33(24):9950–  
1368 9956. doi: 10.1523/JNEUROSCI.1095-13.2013.
- 1369 **Roth A, Bahl A.** Divide et impera: optimizing compartmental models of neurons step by step. *The Journal of*  
1370 *Physiology*. 2009 Apr; 587(Pt 7):1369–1370. doi: 10.1113/jphysiol.2009.170944.
- 1371 **Rotstein HG, Pervouchine DD, Acker CD, Gillies MJ, White JA, Buhl EH, Whittington MA, Kopell N.** Slow and  
1372 Fast Inhibition and an H-Current Interact to Create a Theta Rhythm in a Model of CA1 Interneuron Network.  
1373 *Journal of Neurophysiology*. 2005 Aug; 94(2):1509–1518. doi: 10.1152/jn.00957.2004.
- 1374 **Roux L, Buzsáki G.** Tasks for inhibitory interneurons in intact brain circuits. *Neuropharmacology*. 2015 Jan;  
1375 88:10–23. doi: 10.1016/j.neuropharm.2014.09.011.
- 1376 **Santoro B, Chen S, Luthi A, Pavlidis P, Shumyatsky GP, Tibbs GR, Siegelbaum SA.** Molecular and functional  
1377 heterogeneity of hyperpolarization-activated pacemaker channels in the mouse CNS. *J Neurosci*. 2000;  
1378 20(14):5264–5275.
- 1379 **Santoro B, Baram TZ.** The multiple personalities of h-channels. *Trends in Neurosciences*. 2003 Oct; 26(10):550–  
1380 554. doi: 10.1016/j.tins.2003.08.003.

- 1381 **Saraga F**, Wu CP, Zhang L, Skinner FK. Active dendrites and spike propagation in multi-compartment models  
1382 of oriens-lacunosum/moleculare hippocampal interneurons. *The Journal of Physiology*. 2003 Nov; 552(Pt  
1383 3):673–689. <http://www.ncbi.nlm.nih.gov/pubmed/12923216>, doi: 10.1113/jphysiol.2003.046177.
- 1384 **Schneider CA**, Rasband WS, Eliceiri KW. NIH Image to ImageJ: 25 years of image analysis. *Nature Methods*. 2012  
1385 Jul; 9(7):671–675. doi: 10.1038/nmeth.2089.
- 1386 **Schulz DJ**, Goillard JM, Marder E. Variable channel expression in identified single and electrically coupled  
1387 neurons in different animals. *Nature Neuroscience*. 2006 Mar; 9(3):356–362. doi: 10.1038/nn1639.
- 1388 **Sekulić V**, Chen TC, Lawrence JJ, Skinner FK. Dendritic distributions of Ih channels in experimentally-derived  
1389 multi-compartment models of oriens-lacunosum/moleculare (O-LM) hippocampal interneurons. *Frontiers in*  
1390 *Synaptic Neuroscience*. 2015; 7:2. <http://journal.frontiersin.org.myaccess.library.utoronto.ca/article/10.3389/fnsyn.2015.00002/abstract>, doi: 10.3389/fnsyn.2015.00002.
- 1392 **Sekulić V**, Lawrence JJ, Skinner FK. Using multi-compartment ensemble modeling as an investigative tool of  
1393 spatially distributed biophysical balances: application to hippocampal oriens-lacunosum/moleculare (O-LM)  
1394 cells. *PLoS One*. 2014; 9(10):e106567. doi: 10.1371/journal.pone.0106567.
- 1395 **Sekulić V**, Skinner FK. Computational models of O-LM cells are recruited by low or high theta frequency  
1396 inputs depending on h-channel distributions. *eLife*. 2017 Mar; 6:e22962. <https://elifesciences.org/content/6/e22962v1>, doi: 10.7554/eLife.22962.
- 1398 **Sekulić V**, Skinner FK. Experiment-Modelling Cycling with Populations of Multi-Compartment Models: Applica-  
1399 tion to Hippocampal Interneurons. In: Cutsuridis V, et al, editors. *Hippocampal Microcircuits, Springer Series in*  
1400 *Computational Neuroscience* Cambridge, MA: Springer; 2018.
- 1401 **Sivagnanam S**, Majumdar A, Yoshimoto K, Astakhov V, B A, Martone M, Carnevale NT. Introducing The Neuro-  
1402 science Gateway, vol. 993 of CEUR Workshop Proceedings of CEUR Workshop Proceedings; 2013.
- 1403 **Siwani S**, França ASC, Mikulovic S, Reis A, Hilscher MM, Edwards SJ, Leão RN, Tort ABL, Kullander K. OLM $\alpha$ 2 Cells  
1404 Bidirectionally Modulate Learning. *Neuron*. 2018 Jul; 99(2):404–412.e3. doi: 10.1016/j.neuron.2018.06.022.
- 1405 **Skinner FK**, Ferguson KA. Hippocampus, Model Inhibitory Cells. In: Jaeger D, Jung R, editors. *Encyclopedia of*  
1406 *Computational Neuroscience* New York, NY: Springer; 2018.
- 1407 **Soofi W**, Archila S, Prinz A. Co-variation of ionic conductances supports phase maintenance in stomatogastric  
1408 neurons. *Journal of Computational Neuroscience*. 2012; 33(1):77–95. <http://www.springerlink.com/content/t57805006qu12385/abstract/>, doi: 10.1007/s10827-011-0375-3.
- 1410 **Stuart GJ**, Spruston N. Dendritic integration: 60 years of progress. *Nature Neuroscience*. 2015 Dec; 18(12):1713–  
1411 1721. doi: 10.1038/nn.4157.
- 1412 **Swensen AMA**, Bean BPB. Robustness of burst firing in dissociated purkinje neurons with acute or long-term  
1413 reductions in sodium conductance. *J Neurosci*. 2005; 25(14):3509–3520.
- 1414 **Tang LS**, Taylor AL, Rinberg A, Marder E. Robustness of a Rhythmic Circuit to Short- and Long-Term Temperature  
1415 Changes. *The Journal of Neuroscience*. 2012 Jul; 32(29):10075–10085. doi: 10.1523/JNEUROSCI.1443-12.2012.
- 1416 **Tennøe S**, Halnes G, Einevoll GT. Uncertainpy: A Python Toolbox for Uncertainty Quantification and Sensi-  
1417 tivity Analysis in Computational Neuroscience. *Frontiers in Neuroinformatics*. 2018; 12. doi: 10.3389/fn-  
1418 inf.2018.00049.
- 1419 **Ulens C**, Tytgat J. Functional Heteromerization of HCN1 and HCN2 Pacemaker Channels. *J Biol Chem*. 2001;  
1420 276(9):6069–6072. doi: 10.1074/jbc.C000738200.
- 1421 **Urban-Ciecko J**, Barth AL. Somatostatin-expressing neurons in cortical networks. *Nature Reviews Neuroscience*.  
1422 2016 Jul; 17(7):401–409. doi: 10.1038/nrn.2016.53.
- 1423 **Vaidya SP**, Johnston D. Temporal synchrony and gamma-to-theta power conversion in the dendrites of CA1  
1424 pyramidal neurons. *Nature Neuroscience*. 2013 Dec; 16(12):1812–1820. doi: 10.1038/nn.3562.
- 1425 **Van Geit W**, Gevaert M, Chindemi G, Rössert C, Courcol JD, Muller EB, Schürmann F, Segev I, Markram H.  
1426 BluePyOpt: Leveraging Open Source Software and Cloud Infrastructure to Optimise Model Parameters in  
1427 Neuroscience. *Frontiers in Neuroinformatics*. 2016; 10:17. doi: 10.3389/fninf.2016.00017.

- 1428 **Varga C**, Golshani P, Soltesz I. Frequency-invariant temporal ordering of interneuronal discharges during  
1429 hippocampal oscillations in awake mice. *Proceedings of the National Academy of Sciences*. 2012 Oct;  
1430 109(40):E2726–E2734. doi: [10.1073/pnas.1210929109](https://doi.org/10.1073/pnas.1210929109).
- 1431 **Wilson RI**. It takes all kinds to make a brain. *Nature Neuroscience*. 2010 Oct; 13(10):1158–1160. <http://www.nature.com/articles/nn1010-1158>, doi: 10.1038/nn1010-1158.
- 1433 **Yi F**, Ball J, Stoll KE, Satpute VC, Mitchell SM, Pauli JL, Holloway BB, Johnston AD, Nathanson NM, Deisseroth K,  
1434 Gerber DJ, Tonegawa S, Lawrence JJ. Direct excitation of parvalbumin positive interneurons by M1 muscarinic  
1435 acetylcholine receptors: roles in cellular excitability, inhibitory transmission and cognition. *The Journal of*  
1436 *Physiology*. 2014; 592(16):3463–3494. doi: [10.1113/jphysiol.2014.275453](https://doi.org/10.1113/jphysiol.2014.275453).
- 1437 **Zemankovics R**, Káli S, Paulsen O, Freund TF, Hájos N. Differences in subthreshold resonance of hippocampal  
1438 pyramidal cells and interneurons: the role of h-current and passive membrane characteristics: Impedance  
1439 characteristics and h-current of hippocampal neurons. *The Journal of Physiology*. 2010 Jun; 588(12):2109–2132.  
1440 doi: [10.1113/jphysiol.2009.185975](https://doi.org/10.1113/jphysiol.2009.185975).



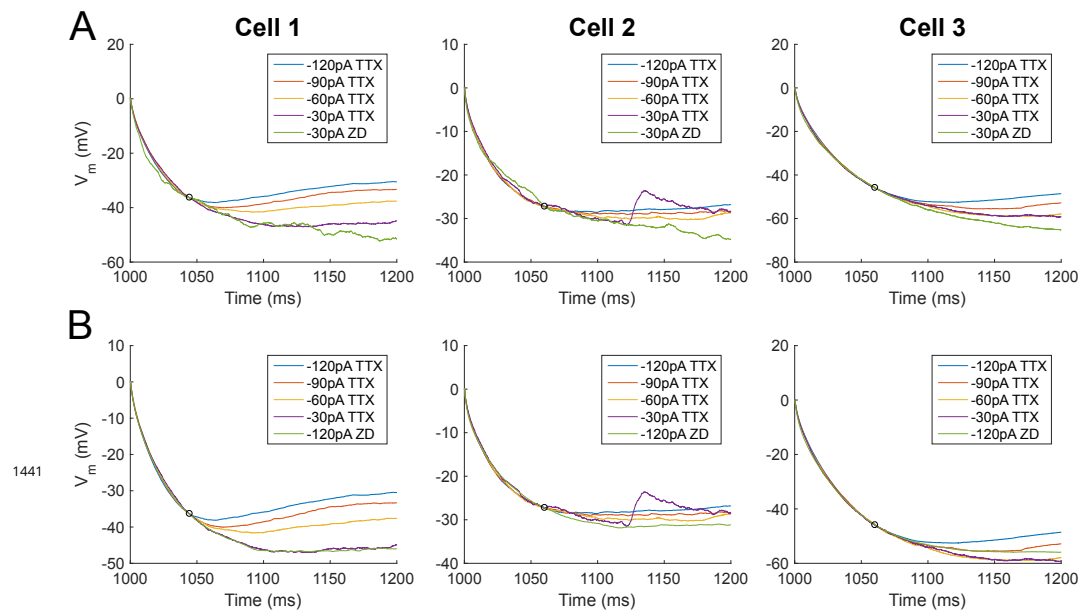

**Figure 2-Figure supplement 1. Comparison of charging portions of membrane potential ( $V_m$ ) for fitting model passive responses. A.** Traces for all hyperpolarizing current injection steps with synaptic and voltage-gated channel blockers, except ZD7288 (“TTX”) and the -30pA trace with ZD7288 application (“ZD”) for *Cell 1*, *Cell 2*, and *Cell 3* (respectively left, middle, right - ordering of cells are the same for remainder of figure). Small circles represent the time point at which all traces were normalized and were determined by eye as the point at which depolarization due to activated h-channels caused TTX traces to deviate from the “passive” ZD condition. This value is unique per cell and relative to the time of step current injection (1000ms) as follows: 44 ms (*Cell 1*), 60 ms (*Cell 2*), 60 ms (*Cell 3*). **B.** As in **A.**, except the -120pA ZD trace is shown instead of the -30pA ZD trace.

1441

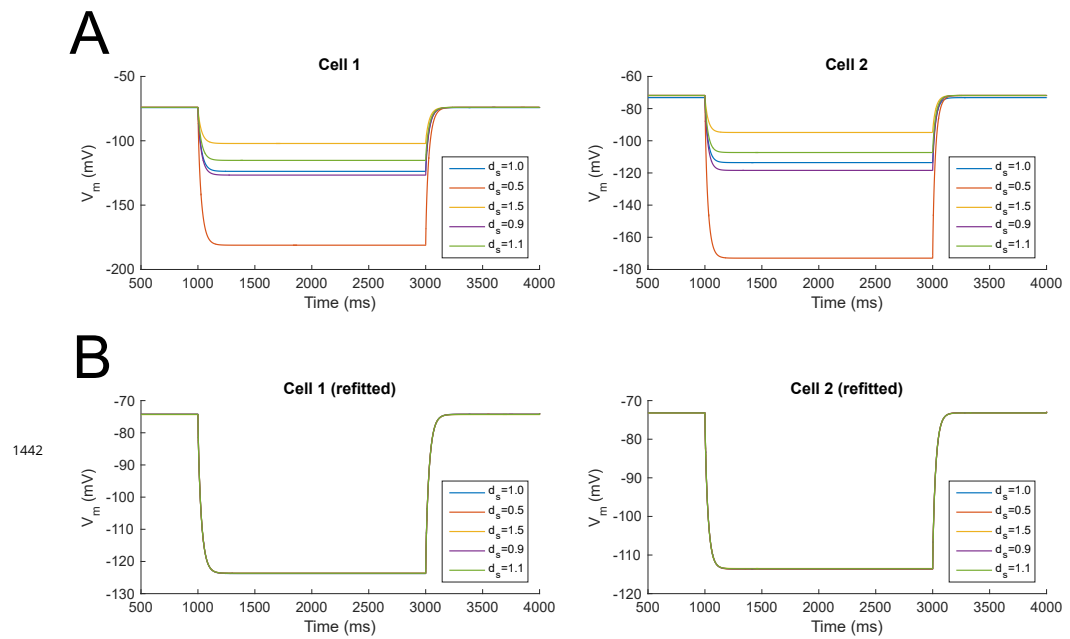

**Figure 2-Figure supplement 2. Model membrane potential ( $V_m$ ) responses with scaled dendritic diameters and both unchanged and refitted passive properties.** Responses of two models (*Cell 1*, left and *Cell 2*, right) to -120pA current clamp step commands and a wide range of rescaled dendritic diameters and with **A.** original (fixed) and **B.** refitted passive properties. The scaling factor,  $d_s$ , represents the constant scaling factor performed on each compartment's diameter in the respective cell reconstruction. The response of the original reconstructed model – i.e., with no scaling – is shown as  $d_s=1.0$  for all cases.

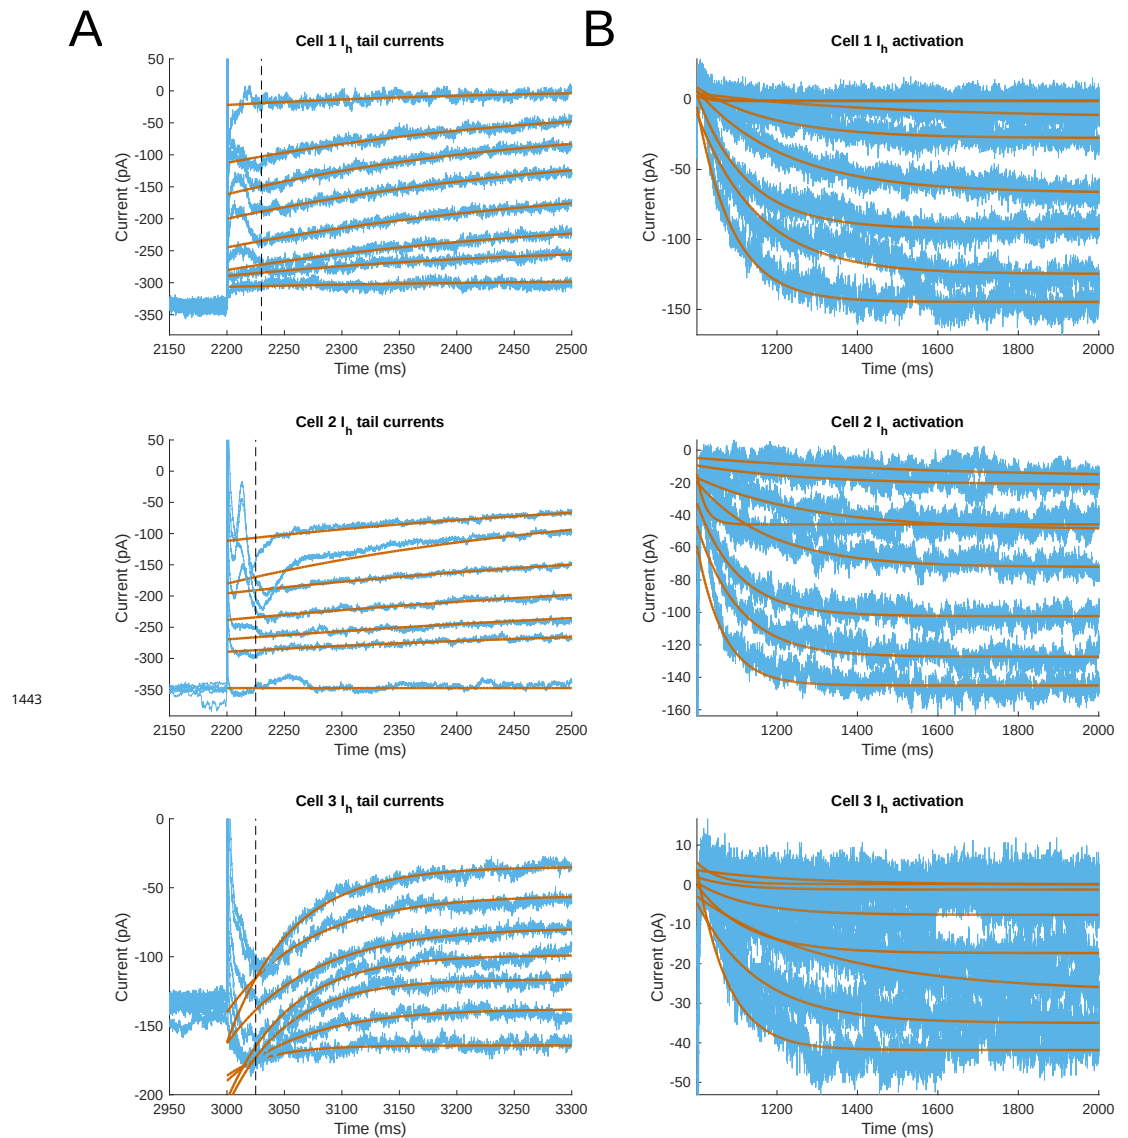

**Figure 3-Figure supplement 1. Experimental traces and fits for reversal potential and time constants of activation and deactivation. A.** Tail current fits. **B.**  $I_h$  activation fits. Tail current protocol with leak subtraction, and ZD-subtracted traces from a voltage-clamp hyperpolarizing step protocol to reveal kinetics of  $I_h$  activation (B), for *Cell 1* (top), *Cell 2* (middle), and *Cell 3* (bottom). Fitted single exponential functions for each trace are shown in the tail current plots (A). The vertical dashed lines denote the approximate point of termination of the capacitive transient, and hence maximum deflection of the  $I_h$  current after the relaxation step in the voltage clamp protocol.

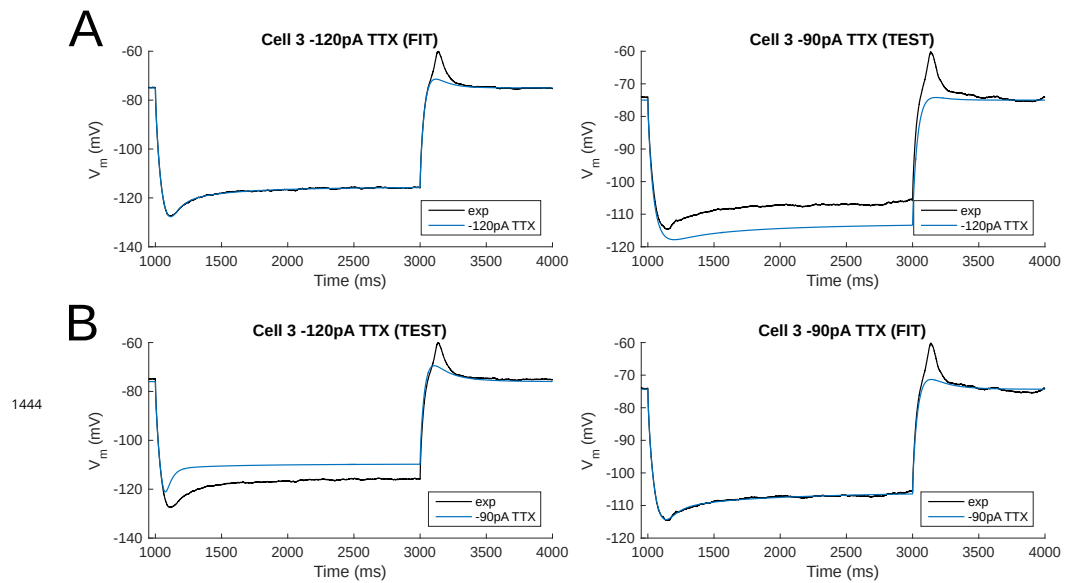

**Figure 4-Figure supplement 1. Simultaneous fitting of all passive and  $I_h$  parameters leads to overfitting of the experimental traces and poor model generalization - Cell 3 as an example.** **A.** Model fitted to a -120pA TTX current clamp trace (left) and tested against a -90pA current clamp trace (right). **B.** The reverse case, with model fitted to a -90pA TTX current clamp trace (right) but tested against a -120pA trace (left).  $H_{dist}=1$ . Holding current injections: 2.7 pA for -120pA step; 3.1 pA for -90pA step.

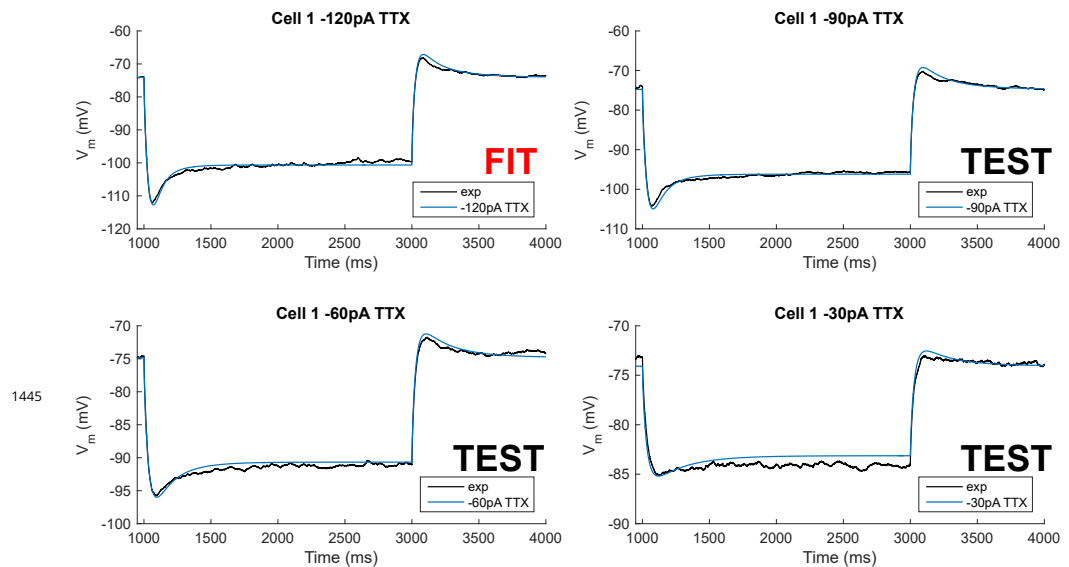

**Figure 4-Figure supplement 2. Traces for Cell 1 model compared to experiment after staggered re-fitting.** Model  $V_m$  traces compared to experiment for Cell 1 with staggered re-fitting procedure, where first passive properties are fitted, followed by total  $G_h$ ,  $r_\infty$  and  $\tau_h$ . Only the -120pA TTX trace was used for fitting; the other traces show validation of the model's parameters using different current clamp steps.  $H_{dist}=1$ . Holding current injections: -28 pA for all four steps of -120, -90, -60, -30 pA.

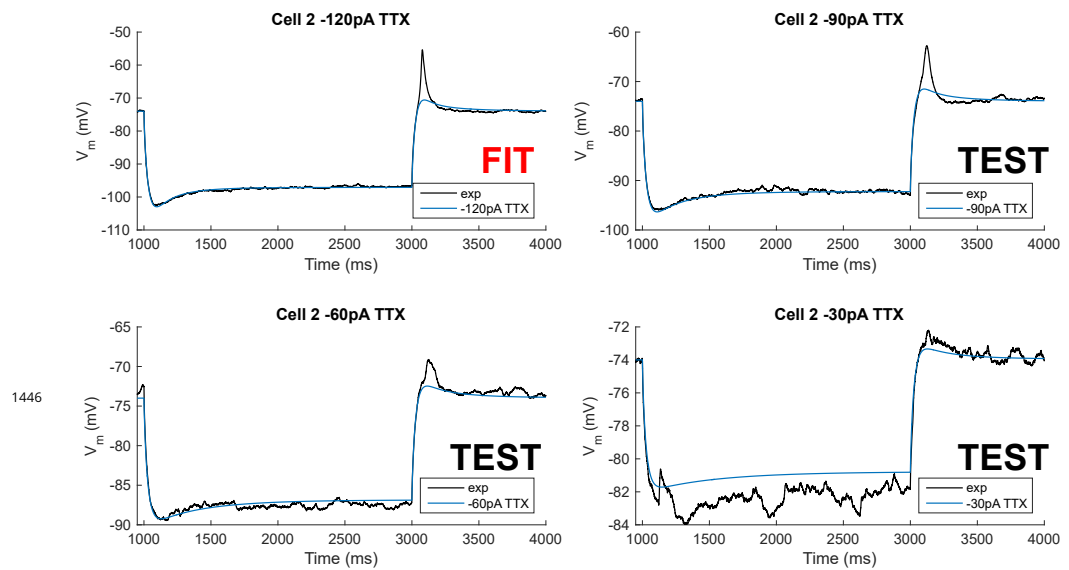

**Figure 4-Figure supplement 3. Traces for Cell 2 model compared to experiment after staggered re-fitting.** Model  $V_m$  traces compared to experiment for *Cell 2* with staggered re-fitting procedure, where first passive properties are fitted, followed by total  $G_h$ ,  $r_\infty$  and  $\tau_h$ . Only the -120pA TTX trace was used for fitting; the other traces show validation of the model's parameters using different current clamp steps.  $H_{dist}=1$ . Holding current injections: -5.1 pA for all four steps of -120, -90, -60, -30 pA.

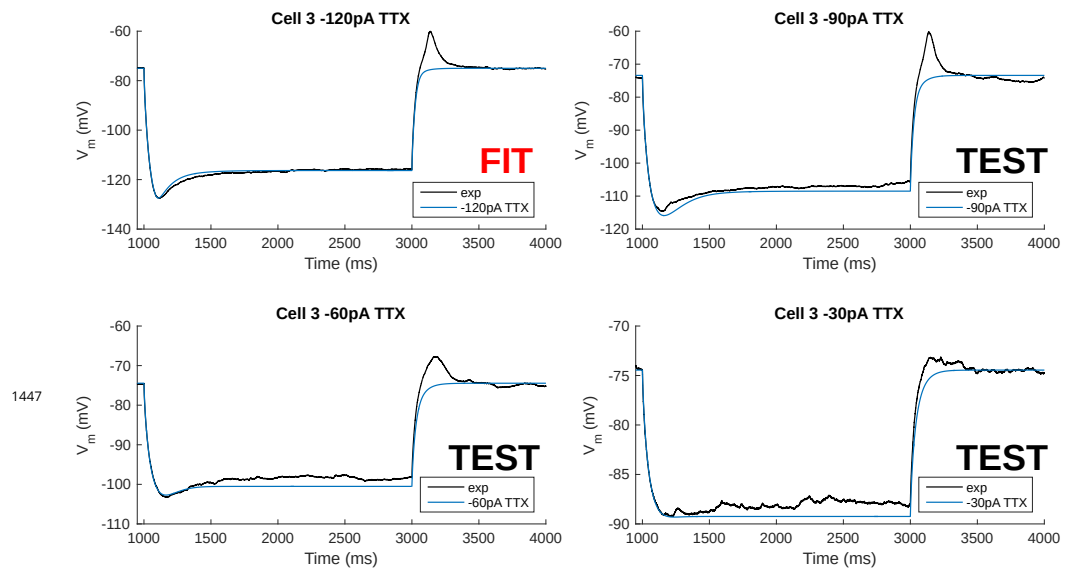

**Figure 4-Figure supplement 4. Traces for Cell 3 model compared to experiment after staggered re-fitting.** Model  $V_m$  traces compared to experiment for *Cell 3* with staggered re-fitting procedure, where first passive properties are fitted, followed by total  $G_h$ ,  $r_\infty$  and  $\tau_h$ . Only the -120pA TTX trace was used for fitting; the other traces show validation of the model's parameters using different current clamp steps.  $H_{dist}=1$ . Holding current injections: 2.7 pA for -120pA step; 3.1 pA for -90 and -60pA steps; 3.4 pA for -30pA step.

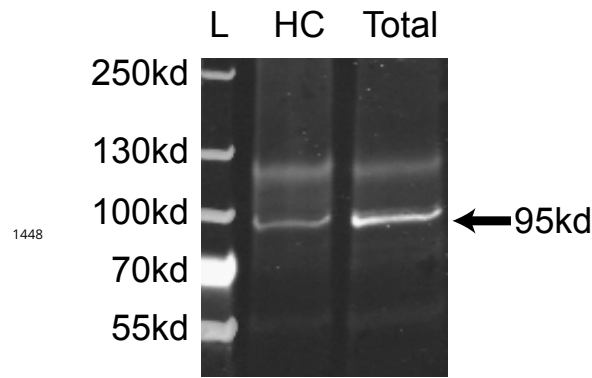

**Figure 6–Figure supplement 1. Western blots.** A specific band is shown in both hippocampal and total brain lysates, which is consistent with the predicted HCN2 molecular weight (95 kd).

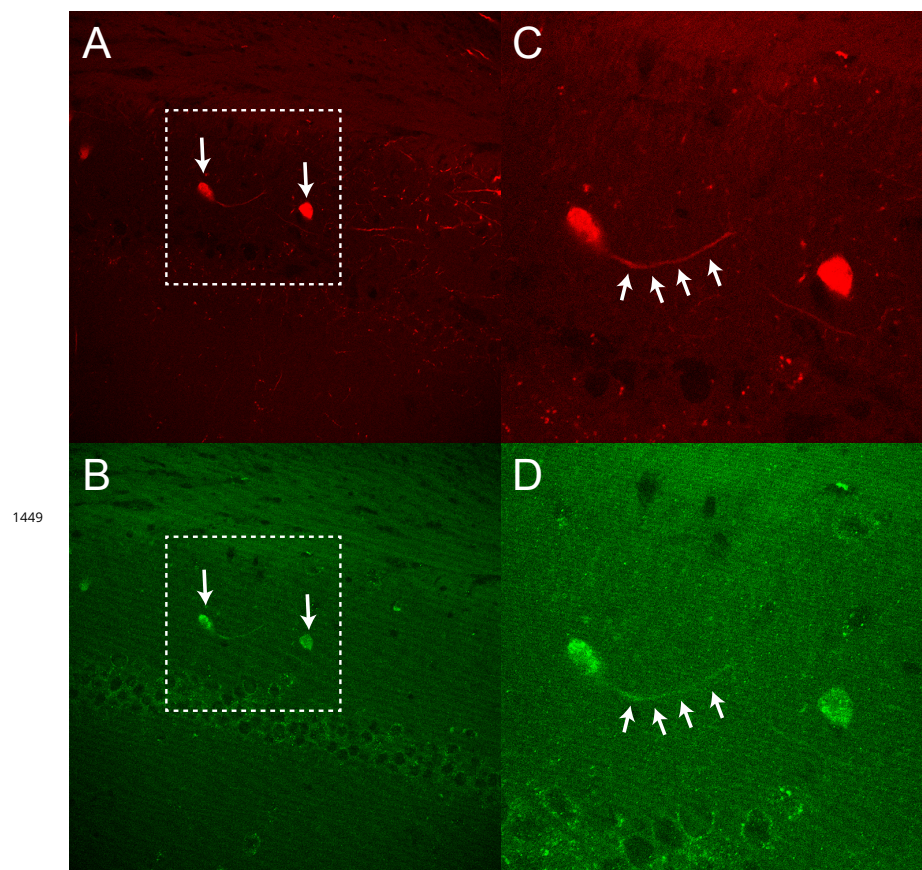

**Figure 6–Figure supplement 2. HCN2 in dorsal hippocampal OLM cells** **A.** Endogenous tdTomato and **B.** HCN2 immunofluorescence imaged in dorsal hippocampal slices from *Chrna2-CRE:tdTomato* mice. **C., D.** Expanded view of panels **A., B.**. Fewer tdTomato cells were found in dorsal compared to ventral slices.

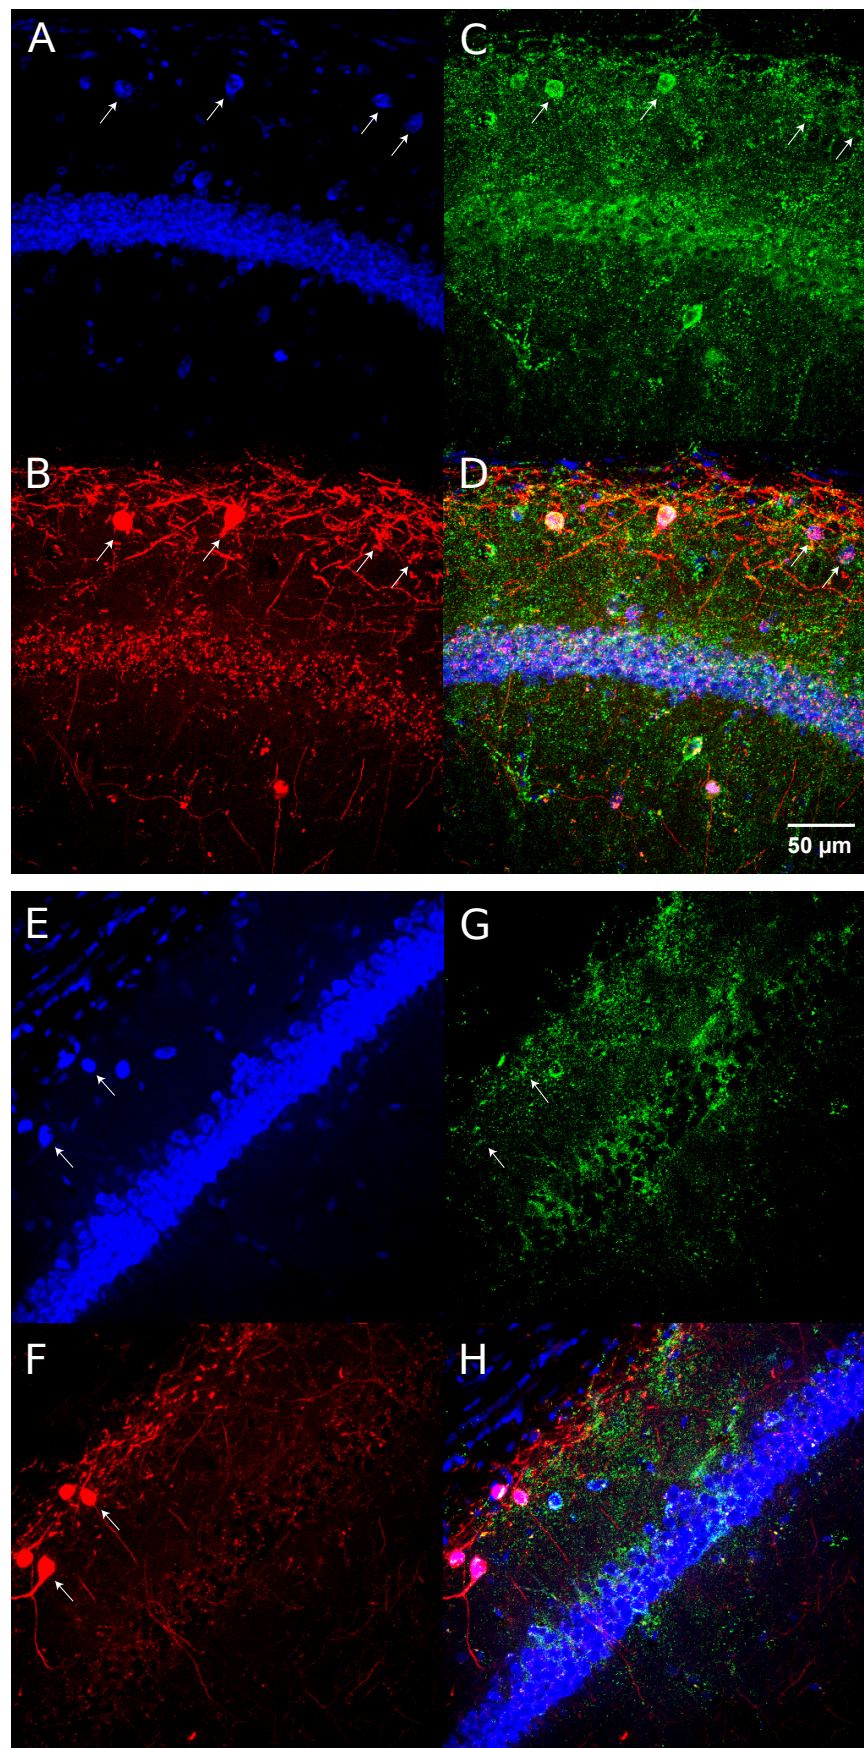

1450

**Figure 6-Figure supplement 3. HCN1 immunofluorescence in hippocampal OLM cells** **A.** Neurotrace 435, **B.** Endogenous tdTomato, **C.** HCN1 immunofluorescence, and **D.** Merged view imaged from dorsal hippocampal slices. **E.-G.** as in **A.-D.** HCN1 from ventral hippocampus.

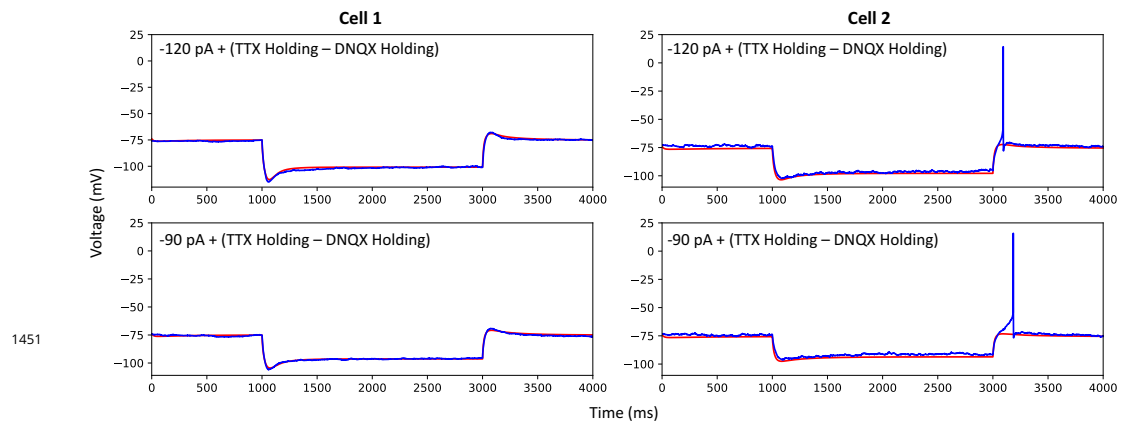

**Figure 7-Figure supplement 1. Adding spiking currents does not affect the fit to hyperpolarizing steps.** When injecting -90 pA and -120 pA current injections to the top spiking models, we accounted for differences in holding currents during experiment with TTX traces or traces from protocol #2 in **Table 5** - 'DNQX current traces'. The spiking models still generate appropriate hyperpolarization responses. *Cell 1* holding current injections: -28 pA for -90 and -120pA steps, TTX traces, and 4pA for DNQX traces; *Cell 2* holding current injections: -5.1 for -90 and -120pA steps, TTX traces, and -5pA for DNQX traces.

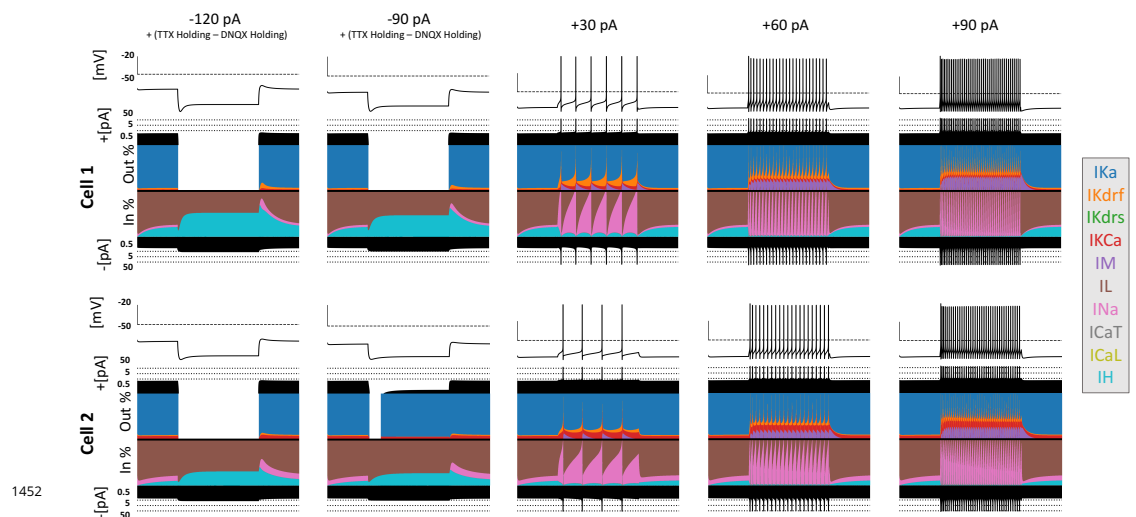

**Figure 7-Figure supplement 2. Currentscapes for top spiking models.** Using -120 pA, -90 pA, +30 pA, +60 pA, and +90 pA current injection steps, the currentscape plots (*Alonso and Marder, 2019*) indicate the relative current contributions (i.e. the color areas in the plots) of the total inward or outward channel currents (i.e. black areas at the top and bottom of each currentscape plot). Note that the recordings shown here are from the first dendritic compartment adjacent to the soma since calcium channels are not present in the somatic compartment. During hyperpolarizing steps, it is evident from these plots that  $I_h$  (IH) and the leak current (IL) are the primary contributors to the electrophysiological output. For depolarizing steps, we see the largest contributions are from A-type potassium current (IKa), fast delayed-rectifier current (IKdrf), sodium current (INa), and calcium-dependent potassium current (IKCa), with increasing contributions from M-type current (IM) as the current step magnitude gets larger. Slow delayed-rectifier current (IKdrs) contributes minimally.



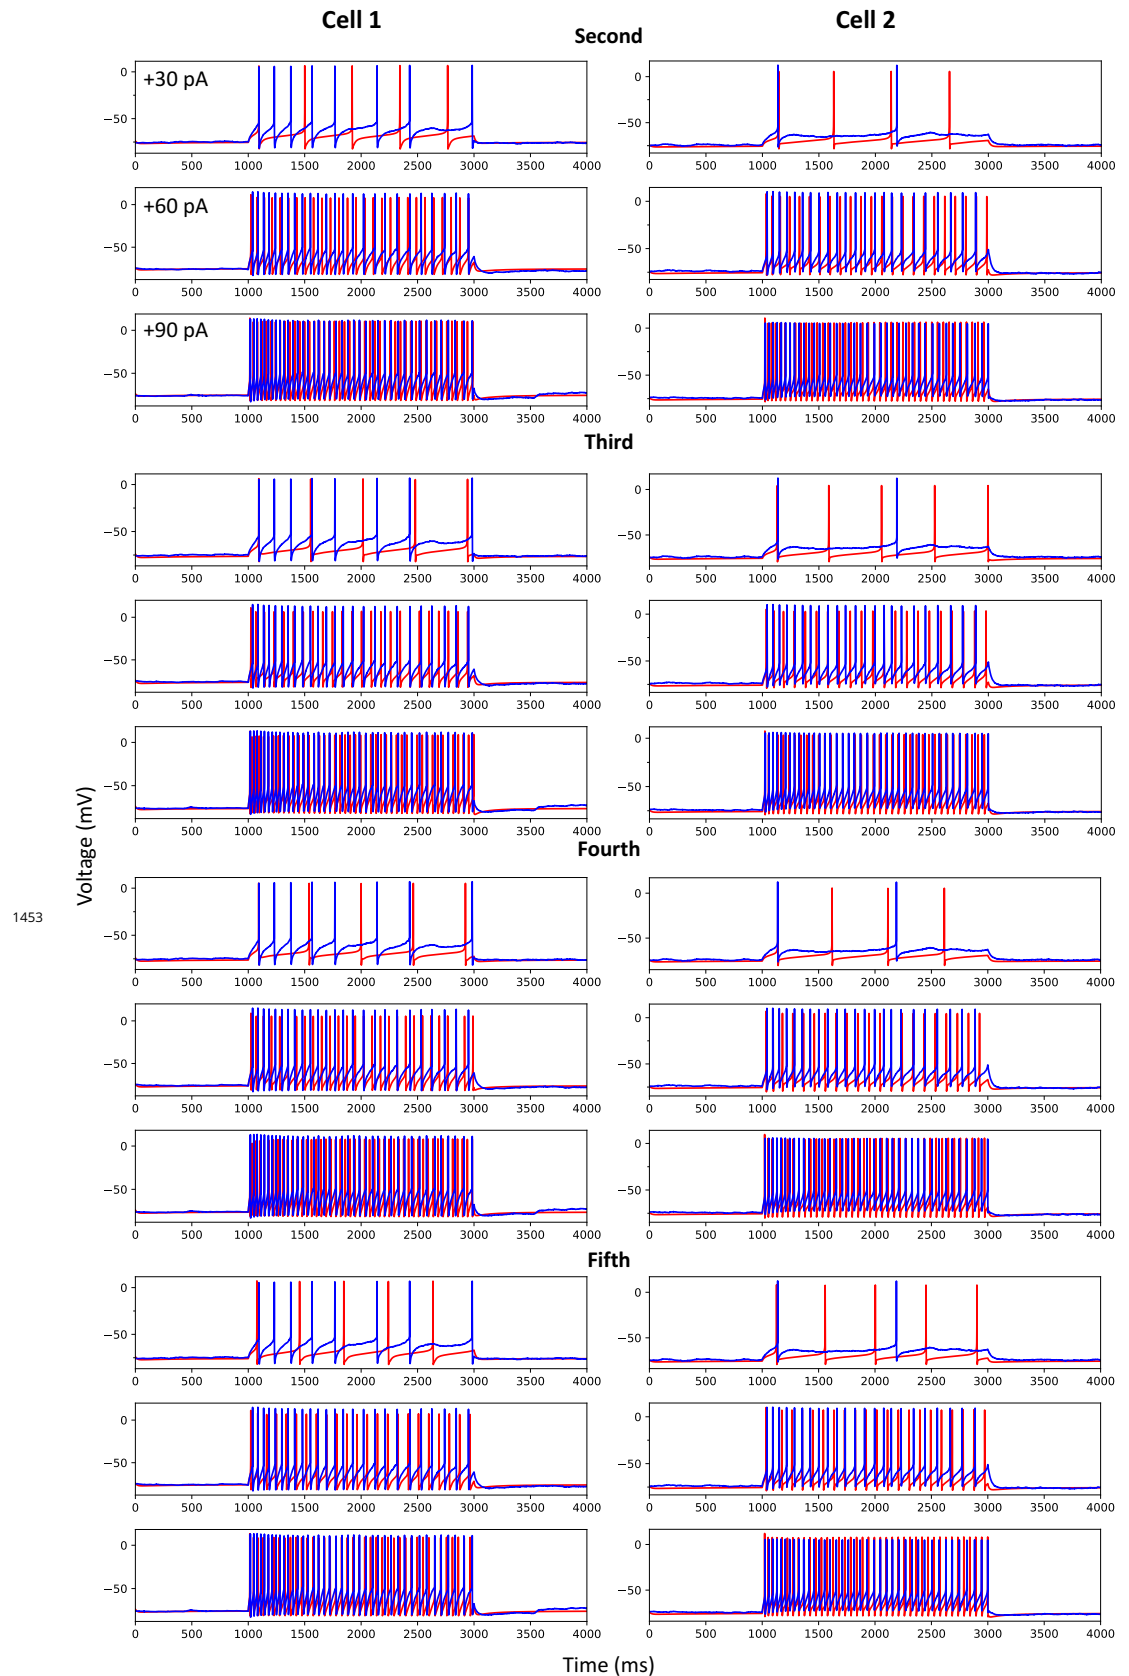

1453

**Figure 7-Figure supplement 3. Other top optimized spiking models.** As in Figure 7, we show the +30 pA, +60 pA, and +90 pA current injection steps for models (red) plotted against the corresponding experimental data (blue). Spiking models for *Cell 1* and *Cell 2* that were ranked second, third, fourth, and fifth are shown from top to bottom.

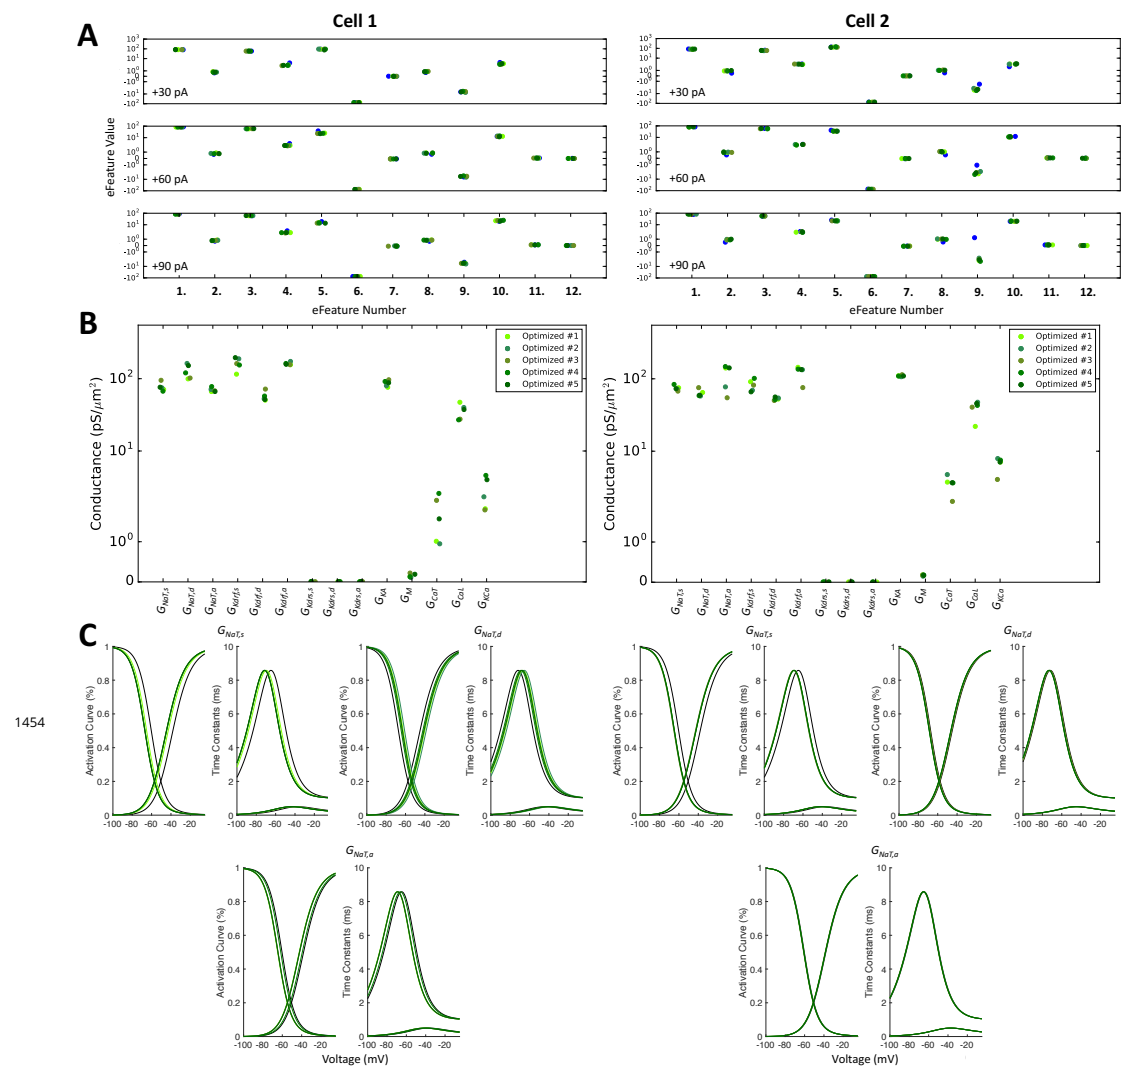

1454

**Figure 7-Figure supplement 4. Optimized spiking model features and parameters.** **A.** Measurements of objective e-features for each of the top five optimized models (shades of green) during the +30 pA, +60 pA, and +90 pA current injection steps. Each number on the x-axis corresponds to an e-feature. For corresponding e-feature names and descriptions, see **Table 10**. The corresponding target values obtained from the experimental data are shown as blue dots. **B.** Optimized conductance values in the top five spiking models. **C.** Voltage-dependency of somatic, dendritic, and axonal sodium channels were allowed to shift during the optimizations. Here we show the resulting voltage-dependent activation curves and time constants in the top five spiking models (shades of green) as compared to the activation curve used in previous instantiations of the OLM cell model (black curves). See Methods for specific numbers.
